# Supplementary material
Source: PubMed Central journal article supplement (PMC8939290)
Supplement: NIHMS1784084-supplement-supplement.pdf [file NIHMS1784084-supplement-supplement.pdf]

# Supporting Information for

## Development of Novel Mitochondrial Pyruvate Carrier Inhibitors to Treat Hair Loss

Xiaoguang Liu<sup>†</sup>, Aimee A. Flores<sup>‡, ⊥, #</sup>, Lisa Situ<sup>‡, ¶</sup>, Wen Gu<sup>§</sup>, Pete Mullen<sup>‡</sup>, Hui Ding,<sup>†</sup> Heather R. Christofk<sup>§, ¶, ⊥, ¶</sup>, William E. Lowry<sup>‡, ¶, ⊥, #</sup>, Michael E. Jung<sup>\*, †, §</sup>

<sup>†</sup>Department of Chemistry and Biochemistry, UCLA; <sup>‡</sup> Department of Molecular Cell and Developmental Biology, UCLA; <sup>§</sup>Department of Molecular and Medical Pharmacology, UCLA; <sup>¶</sup> Jonsson Comprehensive Cancer Center, UCLA; <sup>⊥</sup> Eli and Edythe Broad Center for Regenerative Medicine, UCLA; <sup>#</sup> Molecular Biology Institute, UCLA; <sup>\*</sup> Department of Biological Chemistry, UCLA

### <sup>1</sup>H NMR and <sup>13</sup>C NMR of JXL001–JXL096

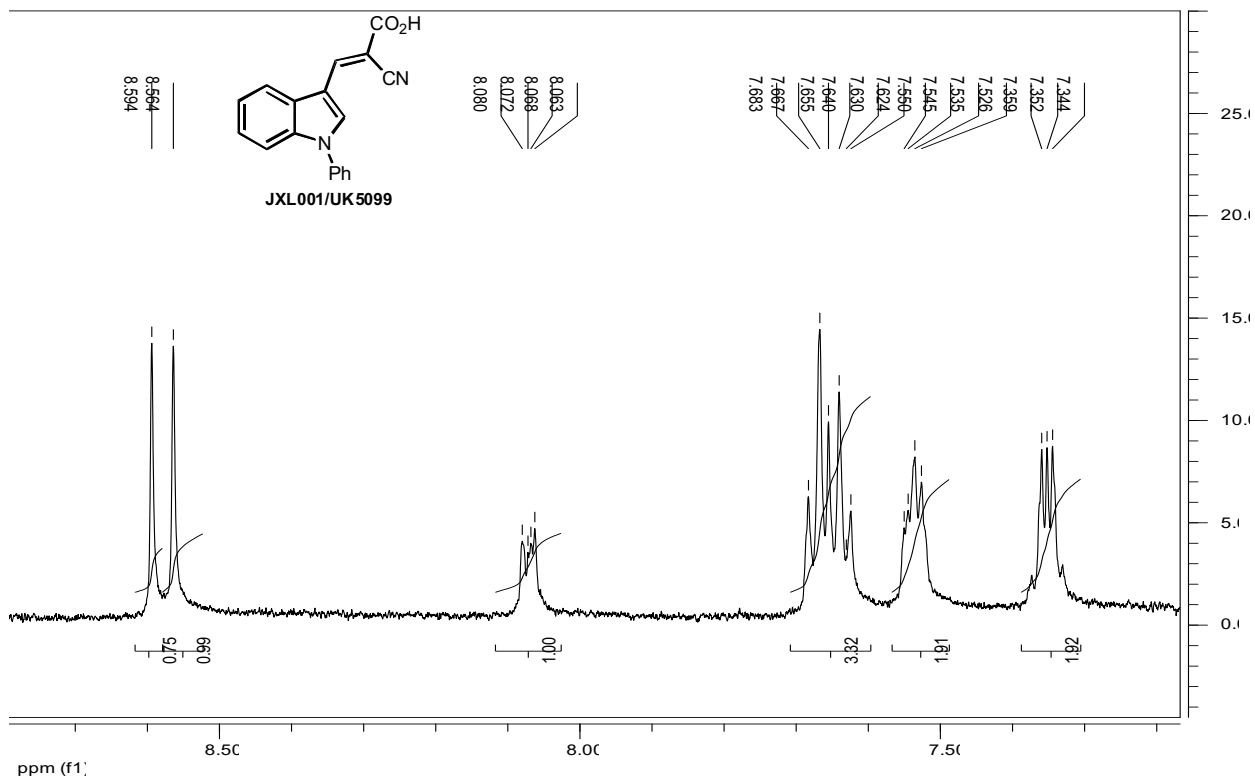

<sup>1</sup>H NMR (500 MHz, DMSO-d<sub>6</sub>)

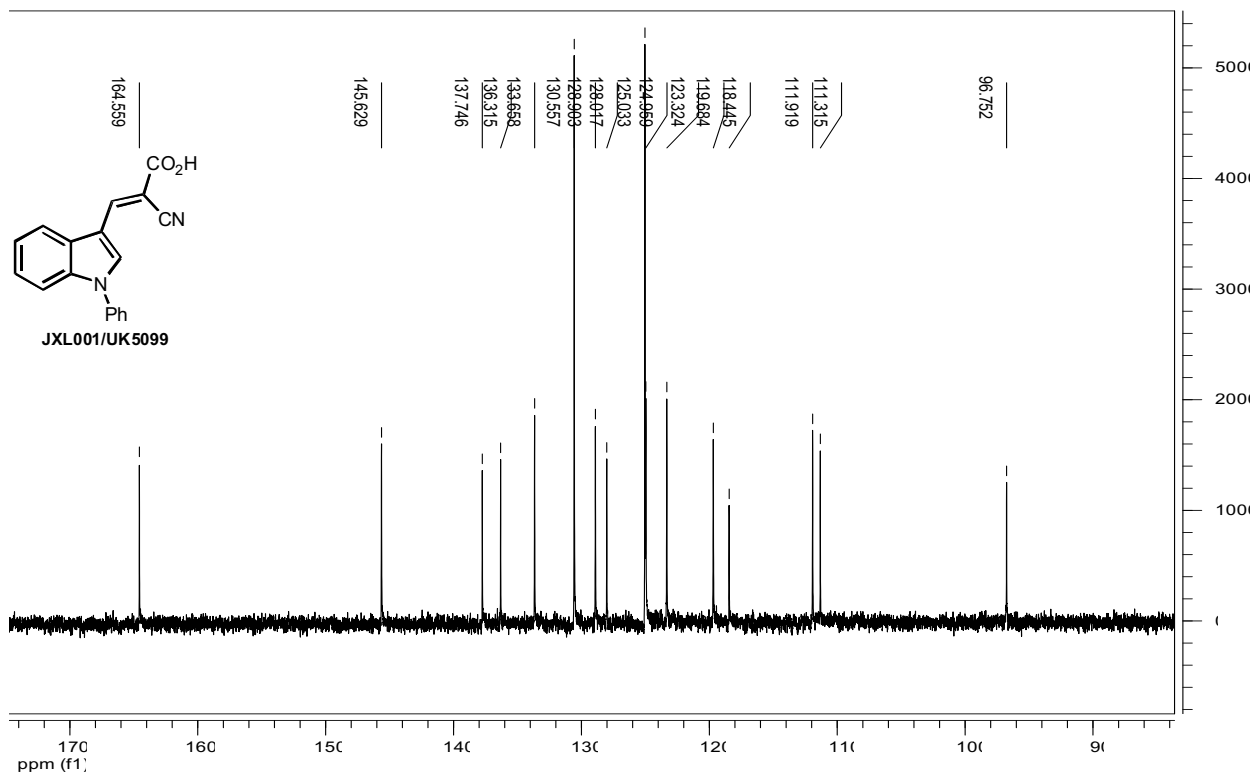

<sup>13</sup>C NMR (126 MHz, DMSO-d<sub>6</sub>)

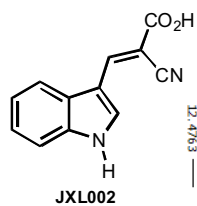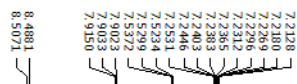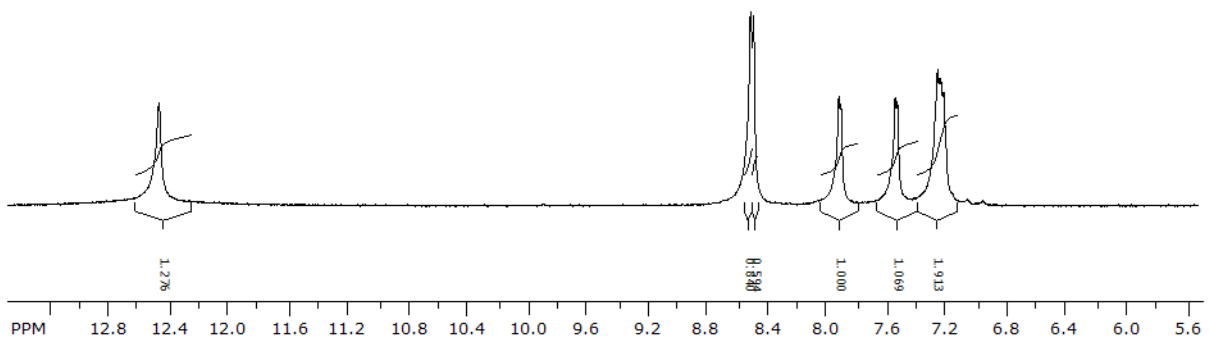

<sup>1</sup>H NMR (500 MHz, DMSO-d<sub>6</sub>)

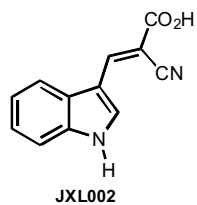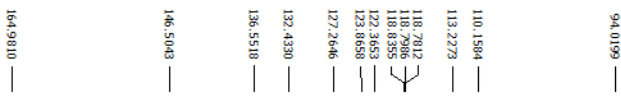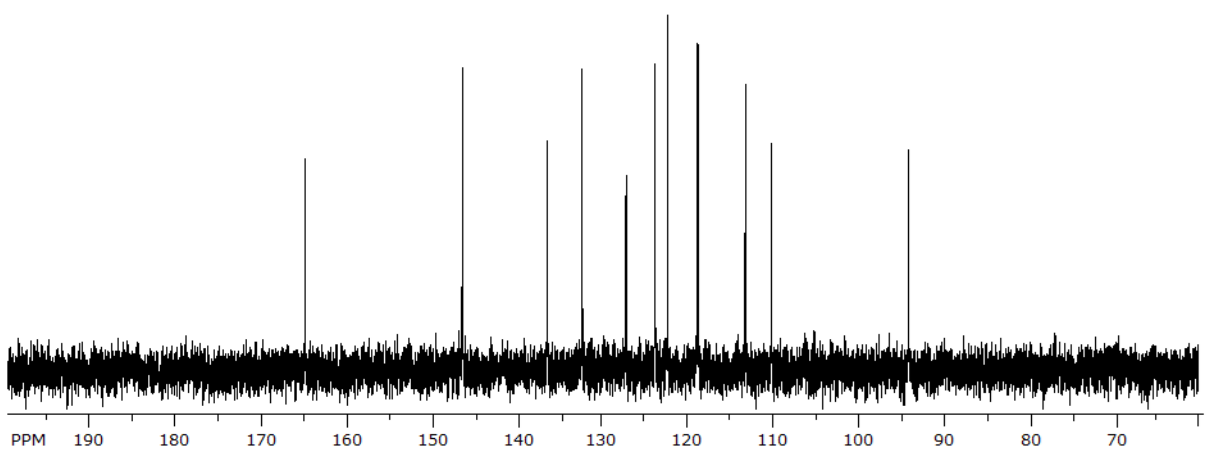

<sup>13</sup>C NMR (126 MHz, DMSO-d<sub>6</sub>)

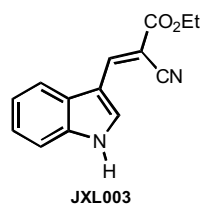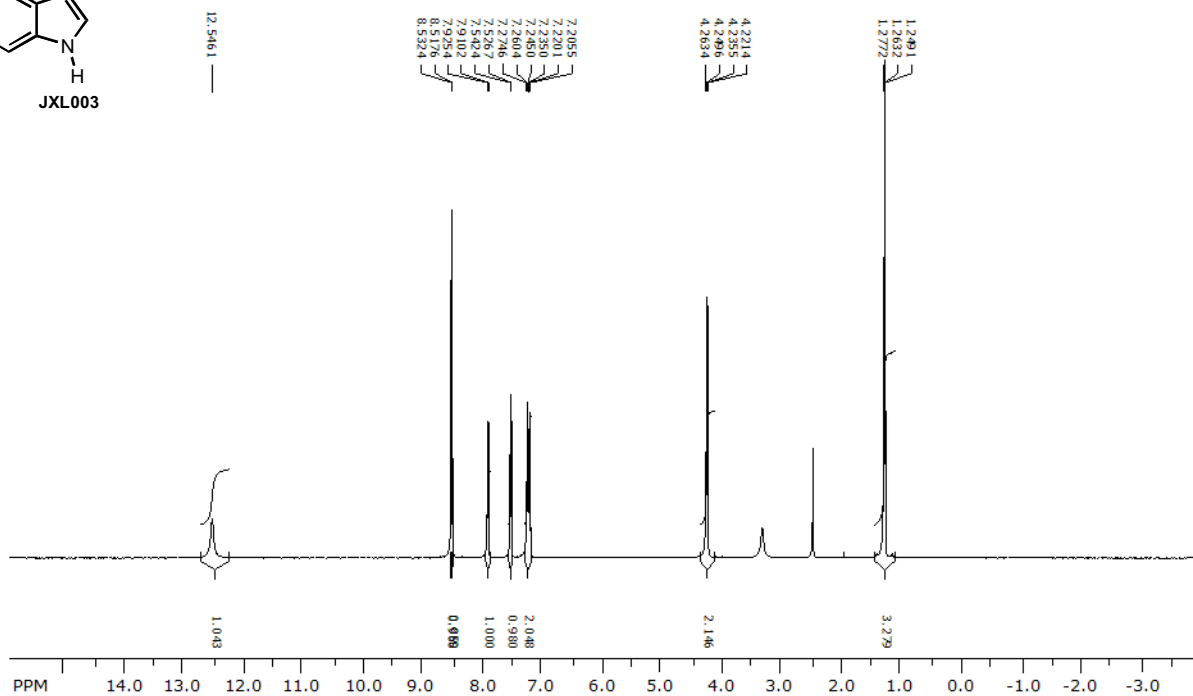

<sup>1</sup>H NMR (500 MHz, CDCl<sub>3</sub>)

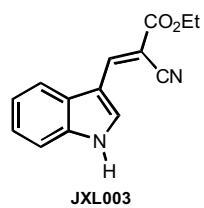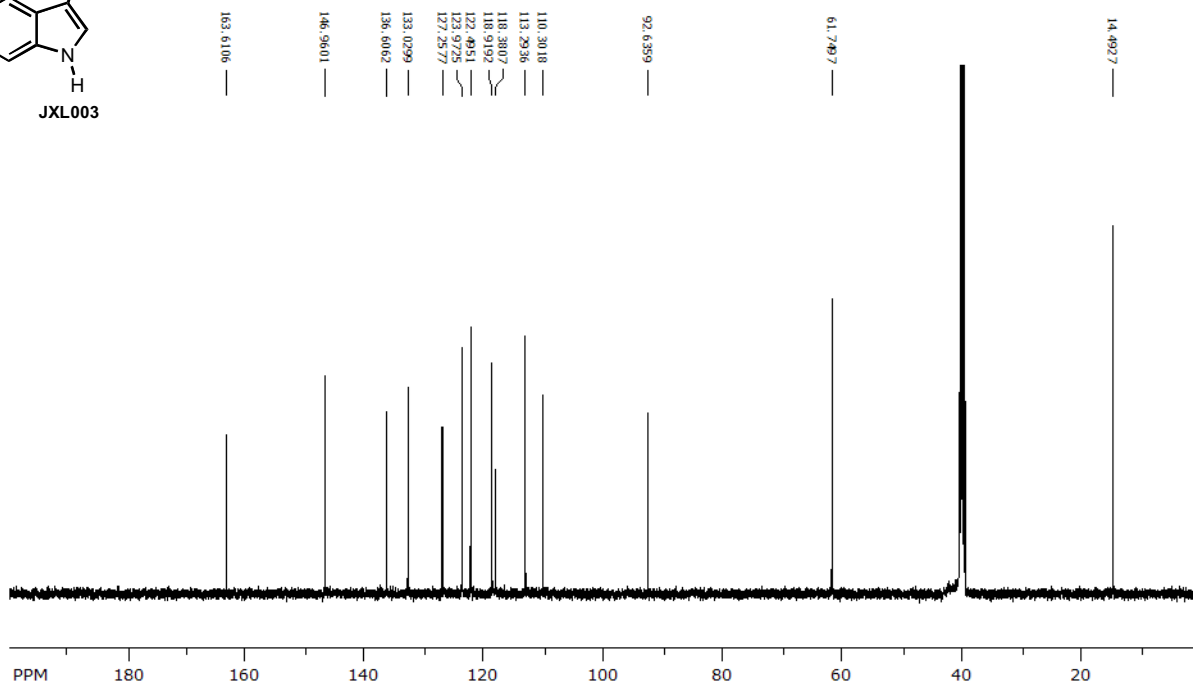

<sup>13</sup>C NMR (126 MHz, CDCl<sub>3</sub>)

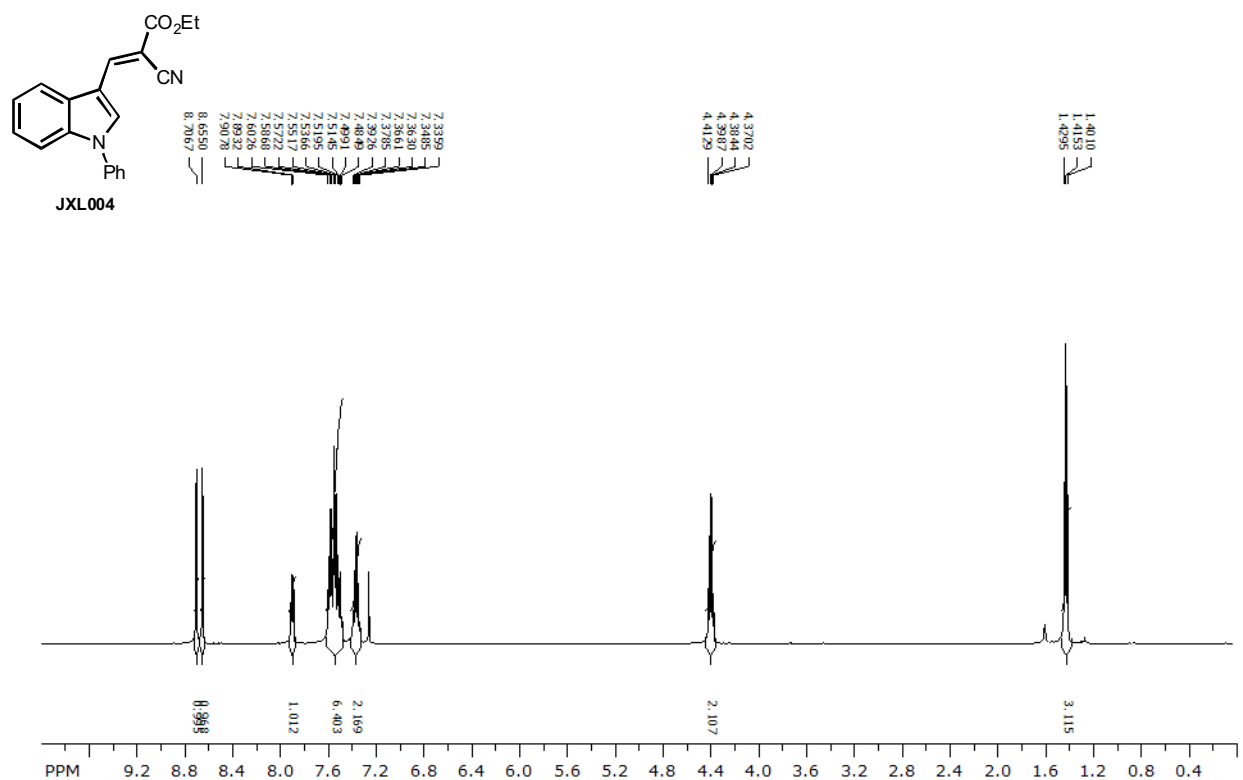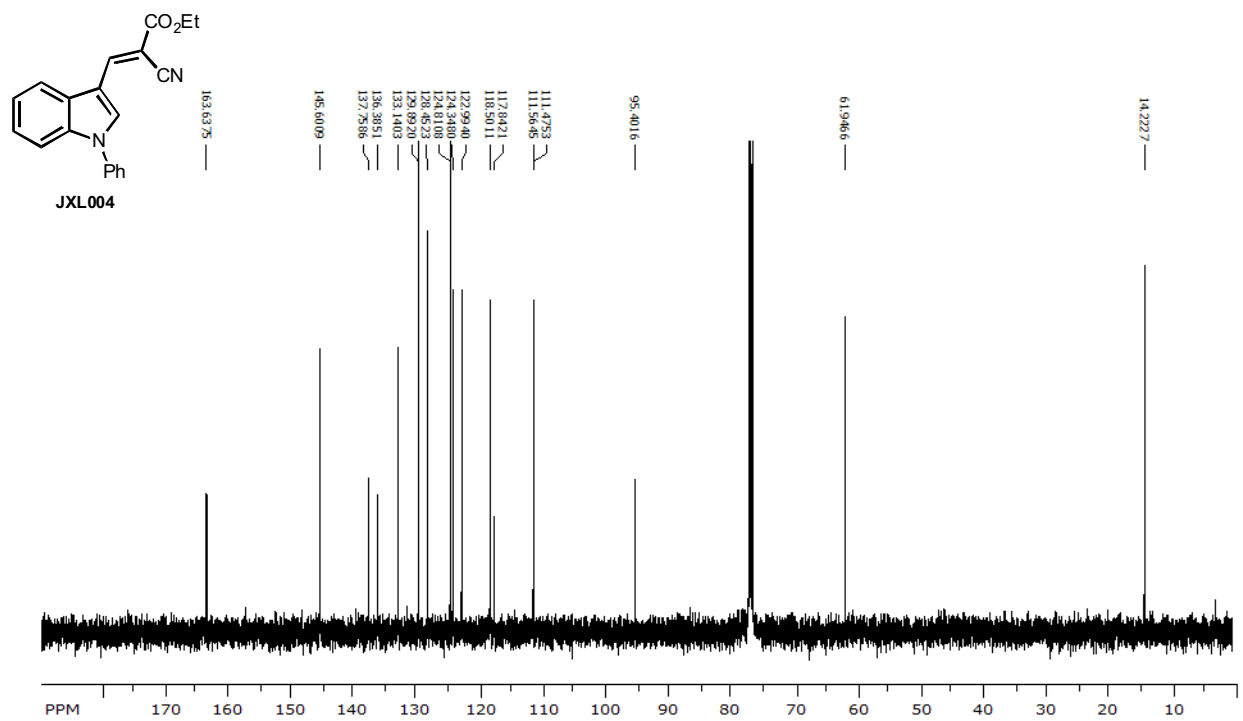

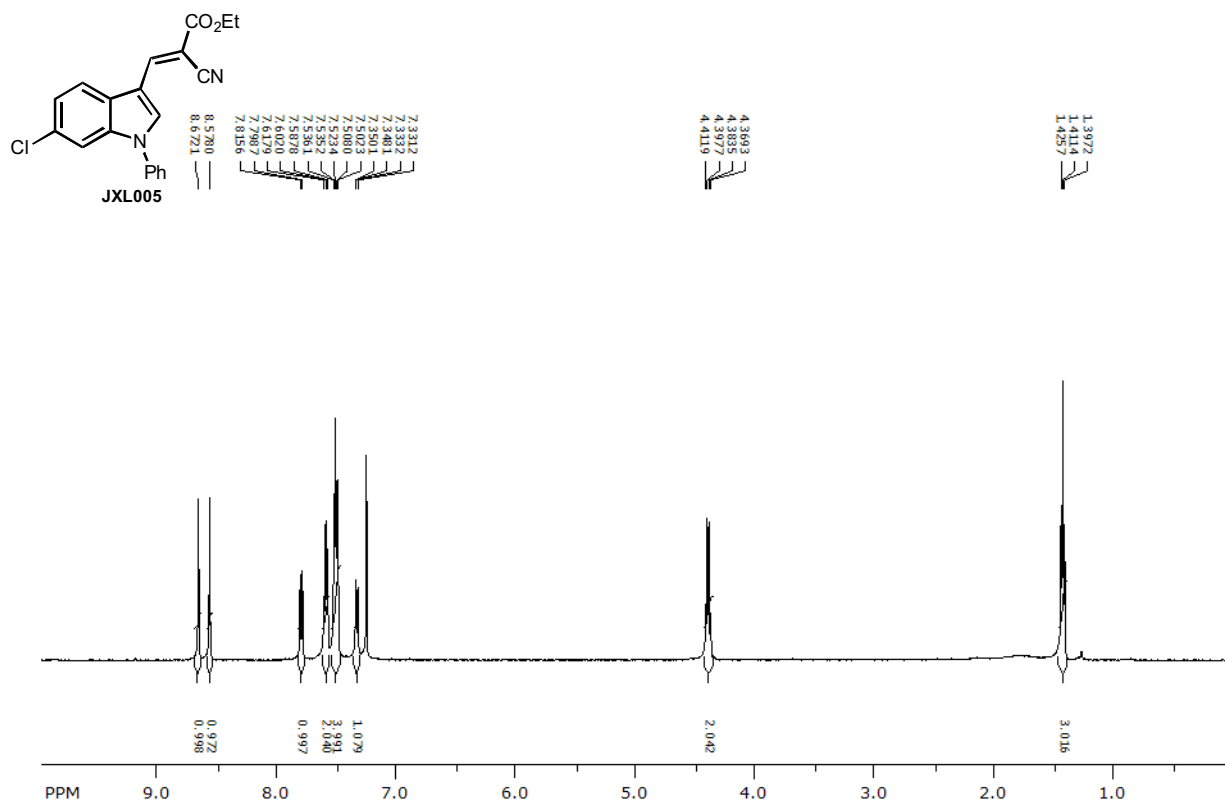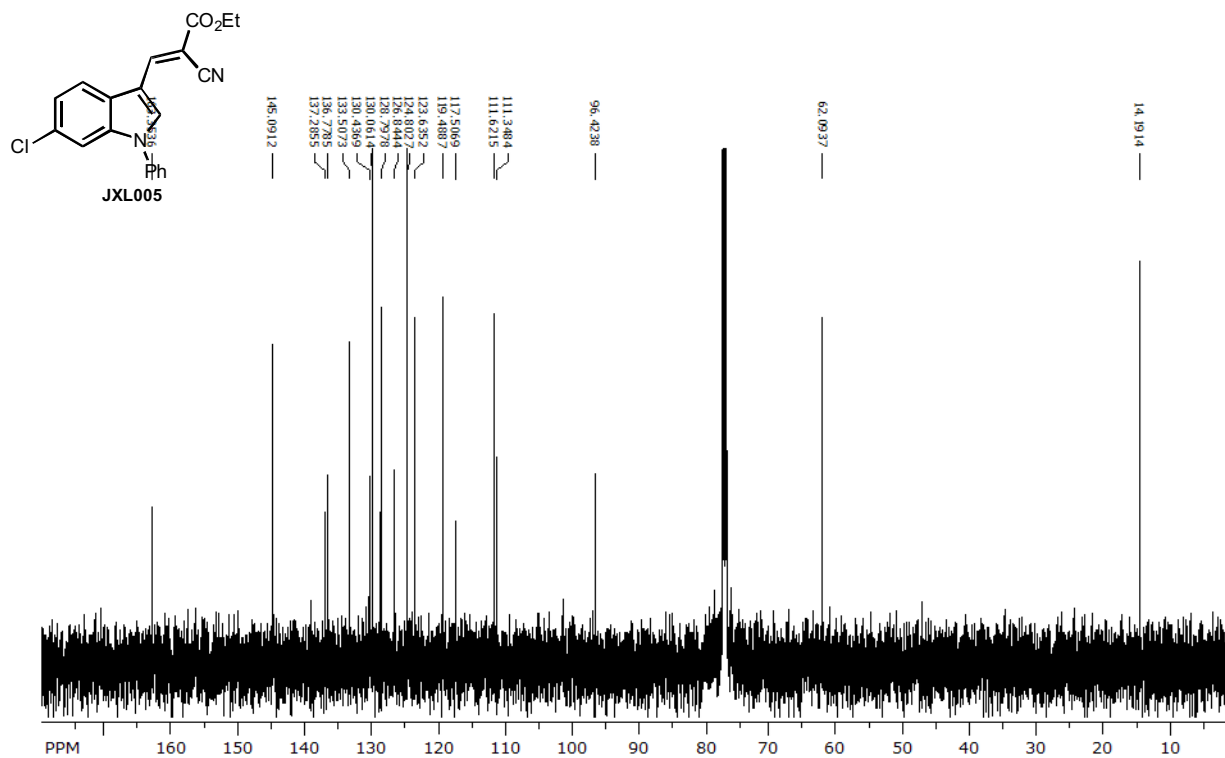

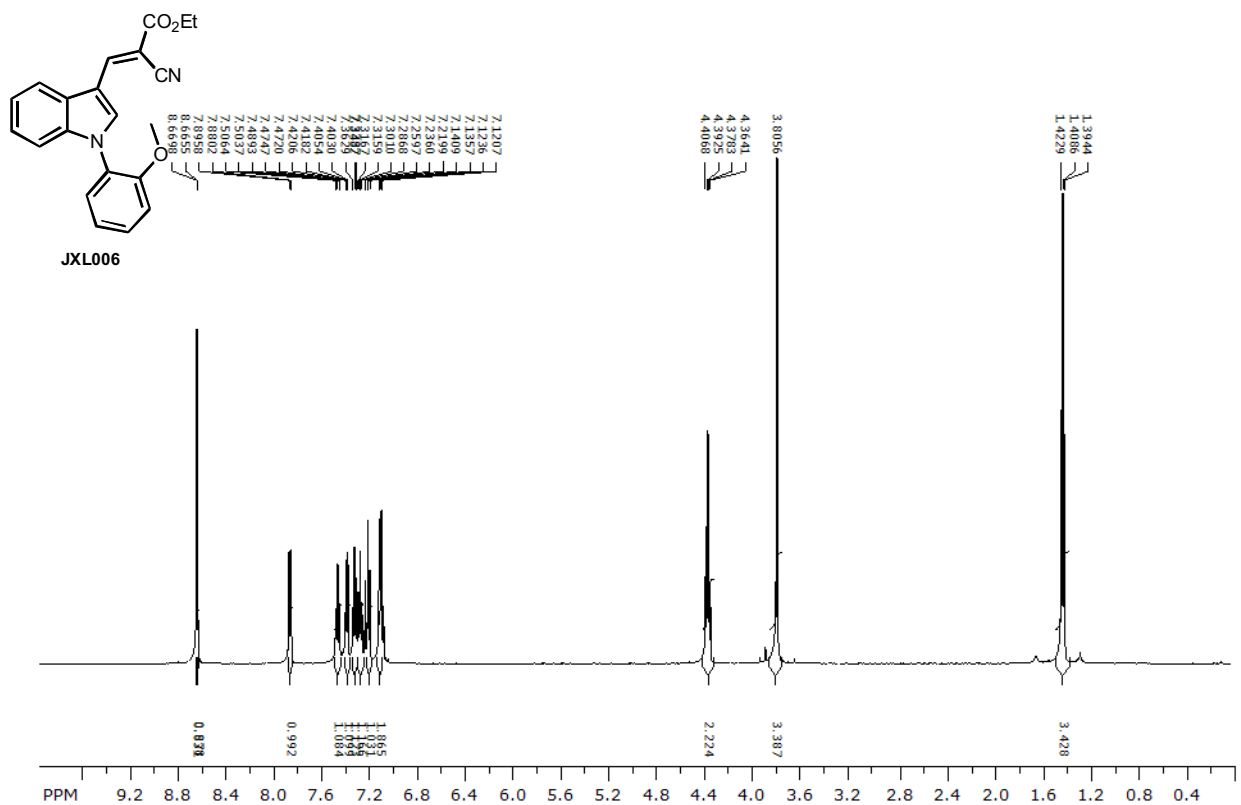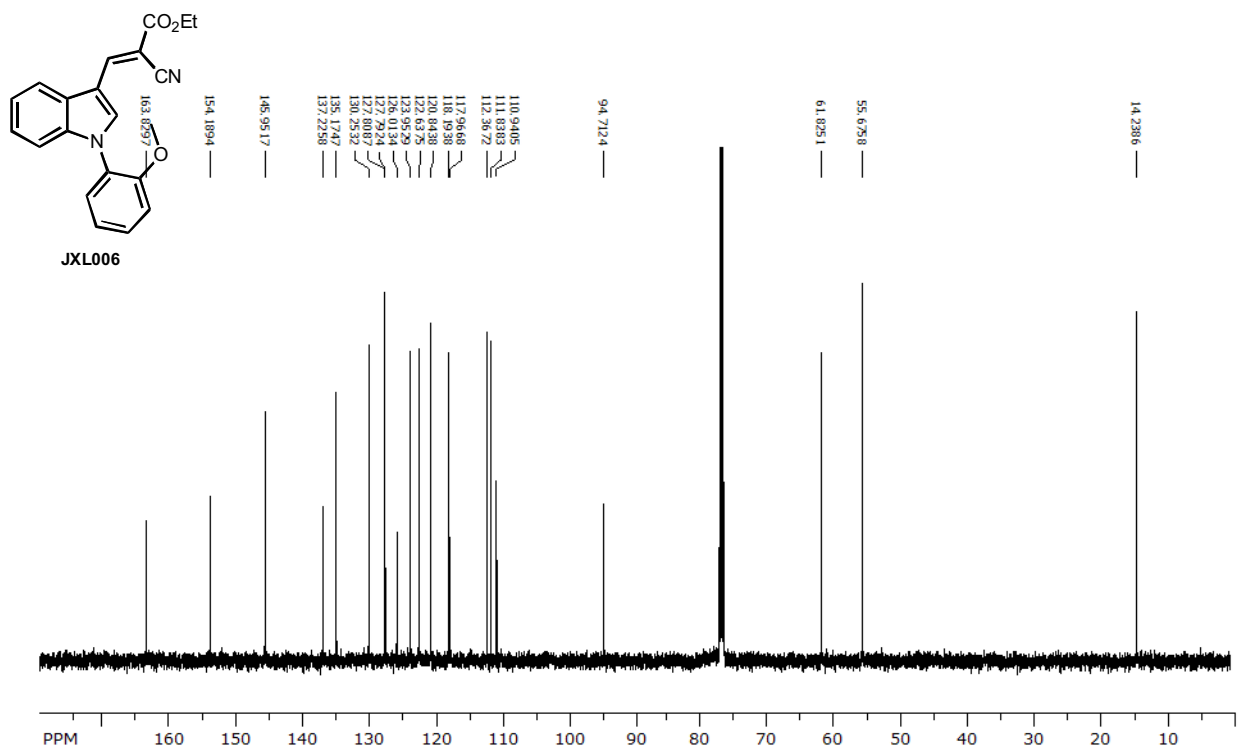

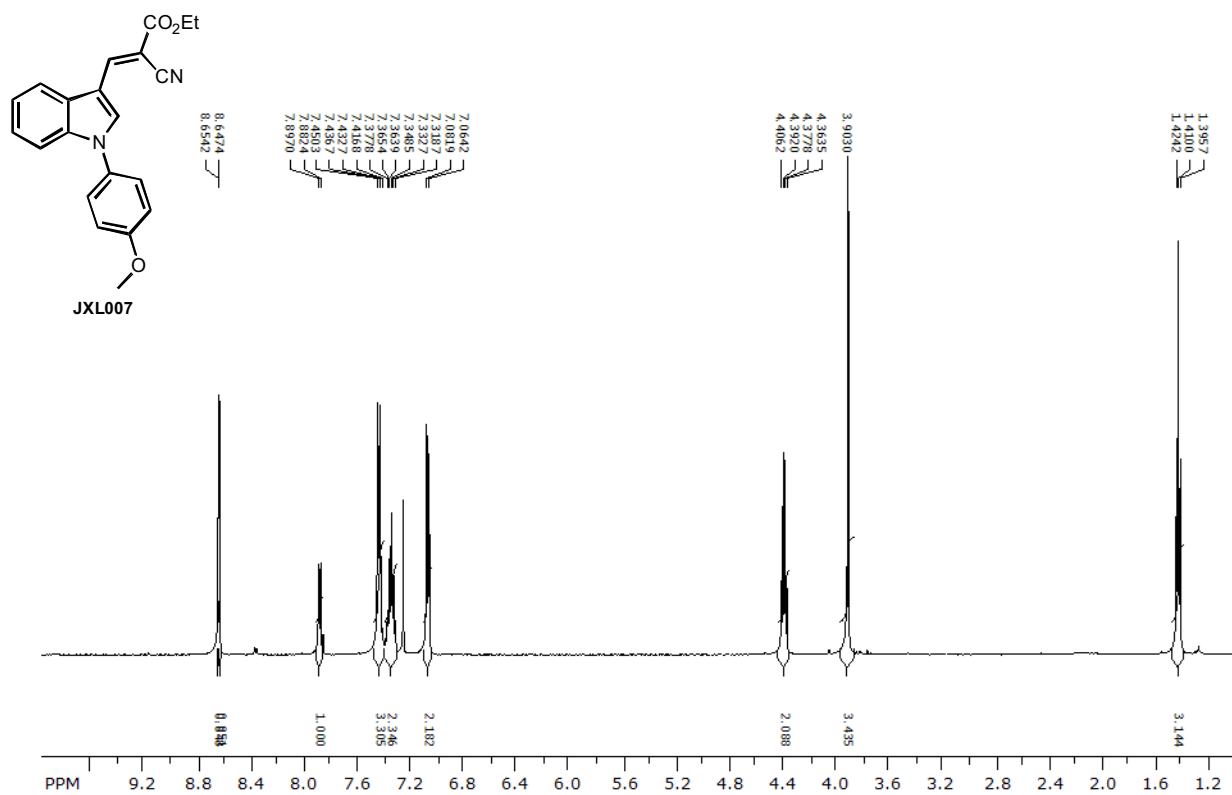

$^1\text{H}$  NMR (500 MHz,  $\text{CDCl}_3$ )

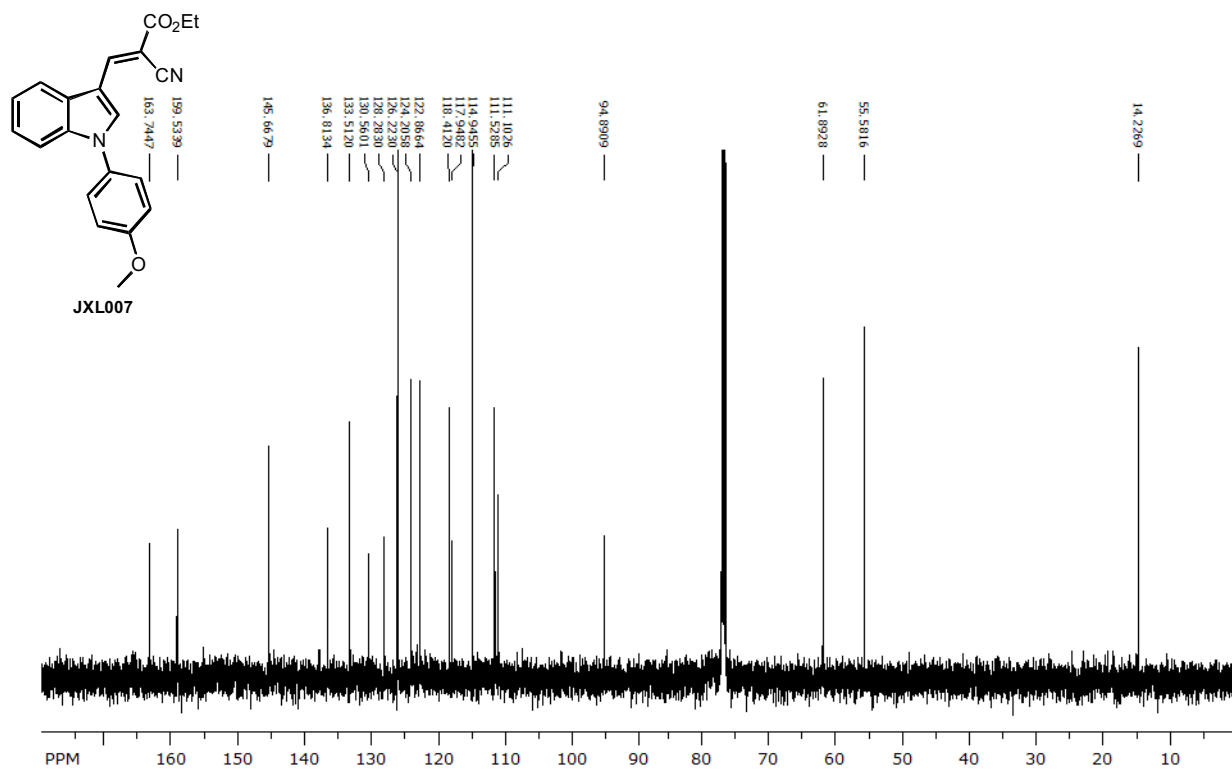

$^{13}\text{C}$  NMR (126 MHz,  $\text{CDCl}_3$ )



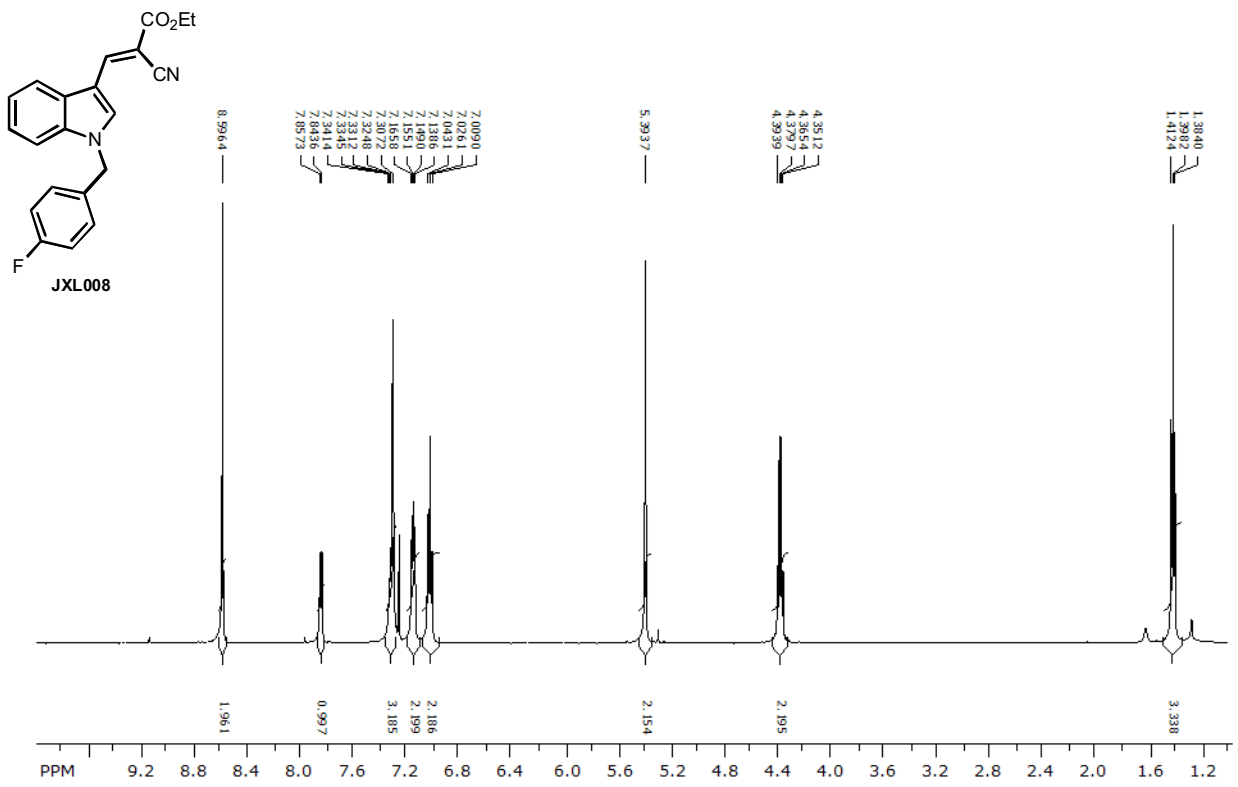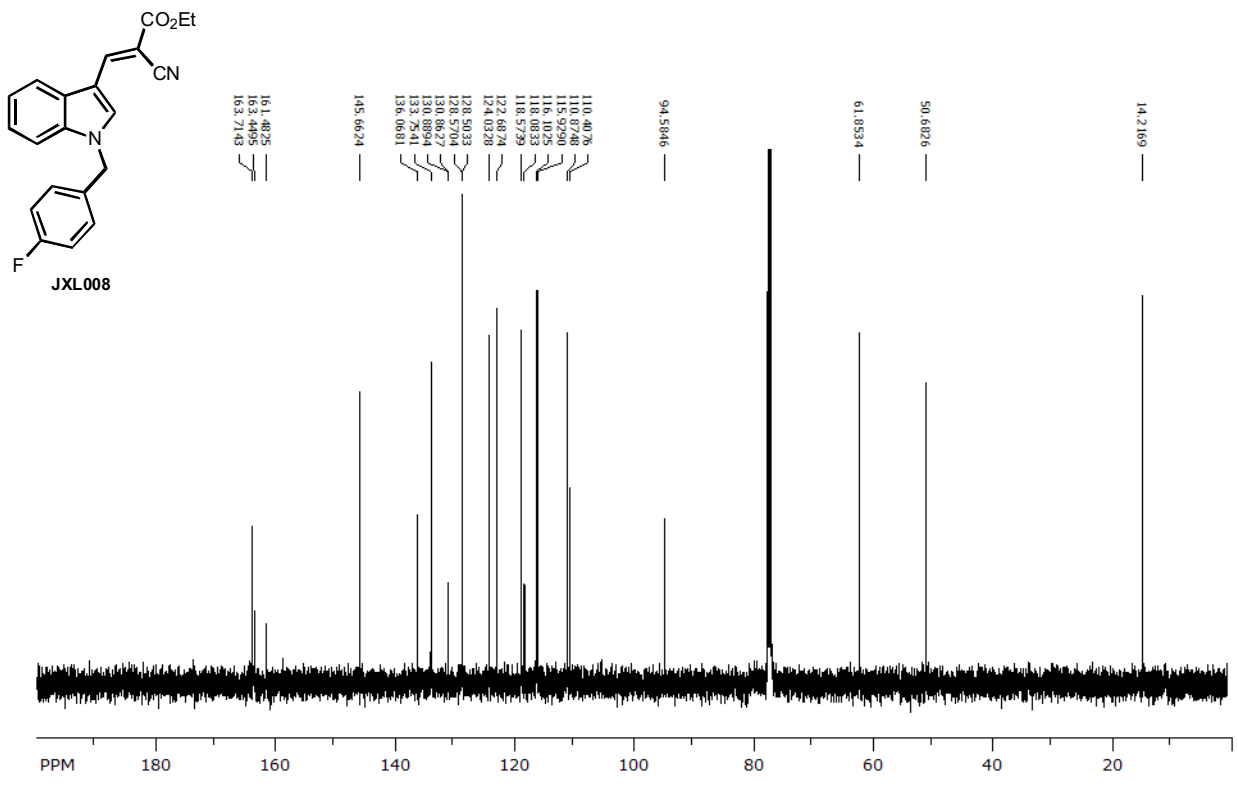

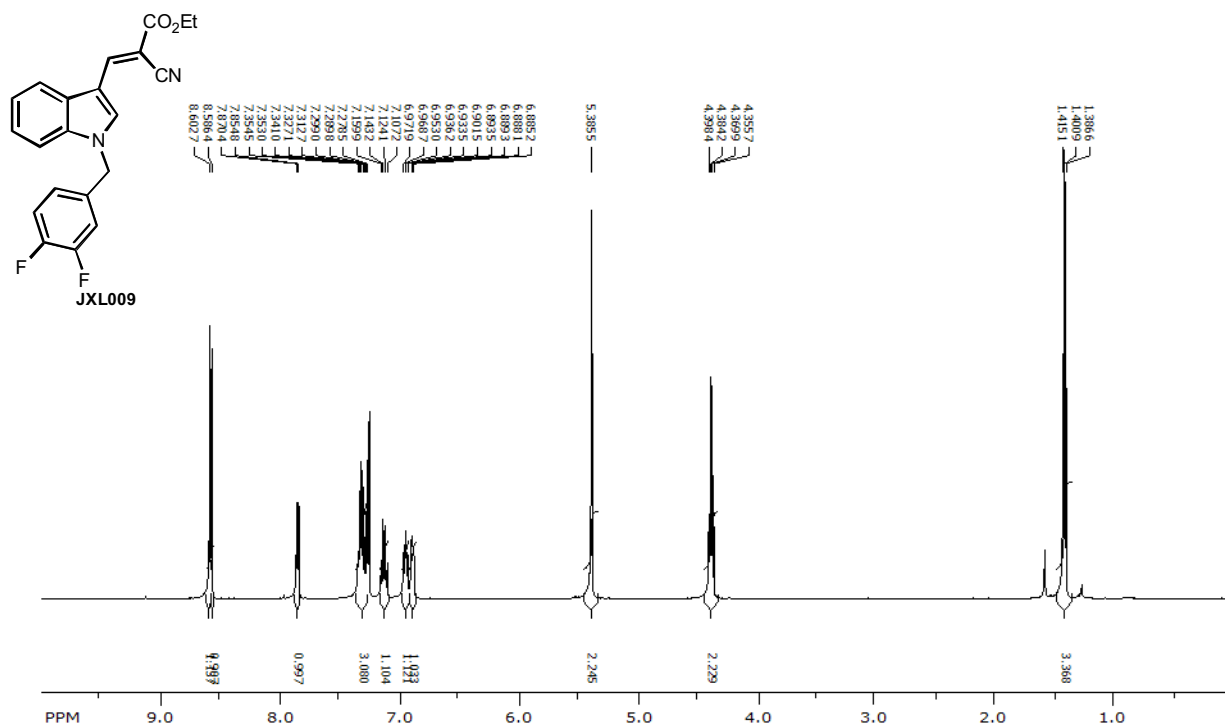

$^1\text{H}$  NMR (500 MHz,  $\text{CDCl}_3$ )

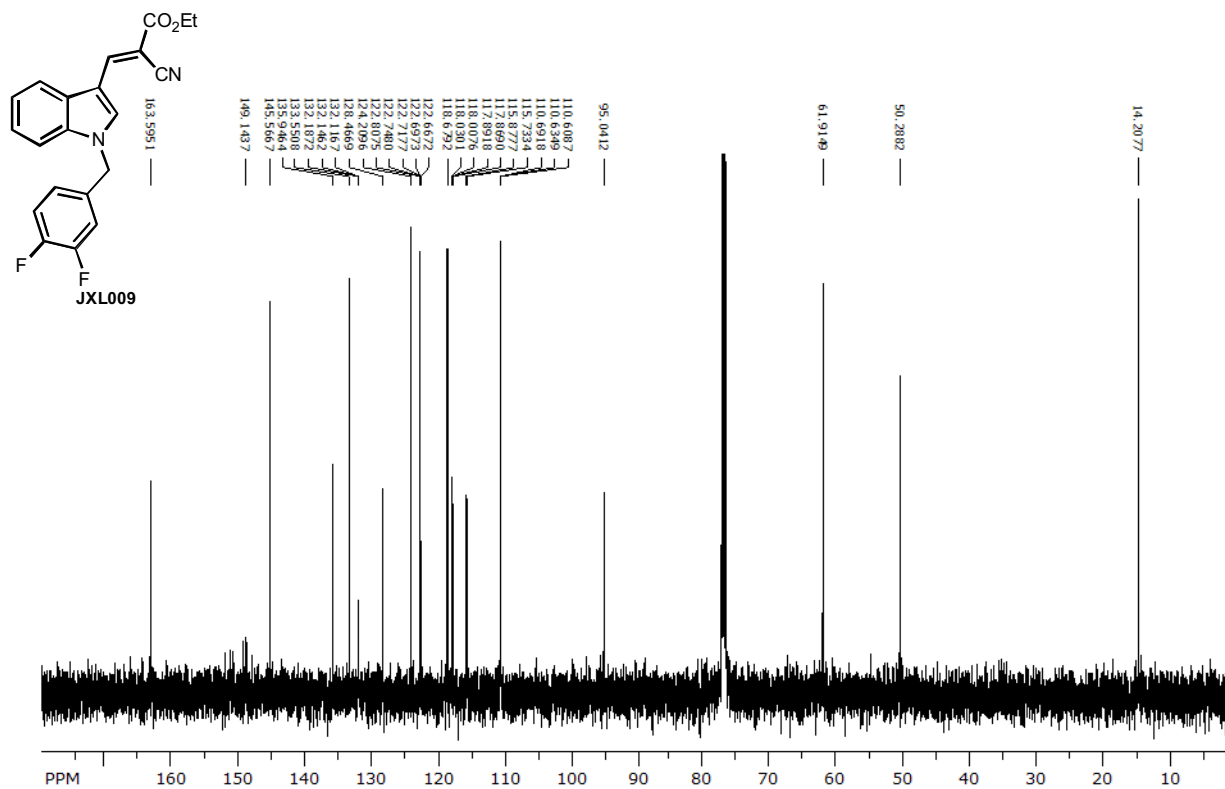

$^{13}\text{C}$  NMR (126 MHz,  $\text{CDCl}_3$ )

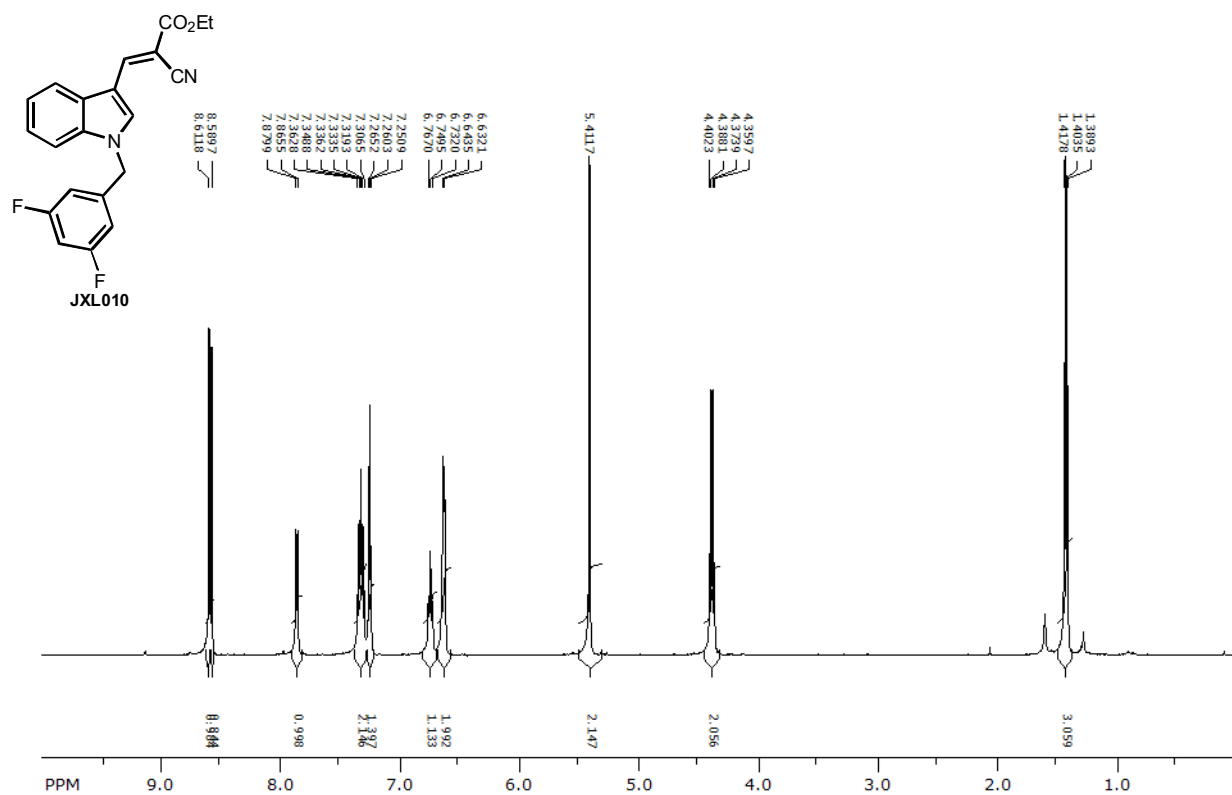

$^1\text{H}$  NMR (500 MHz,  $\text{CDCl}_3$ )

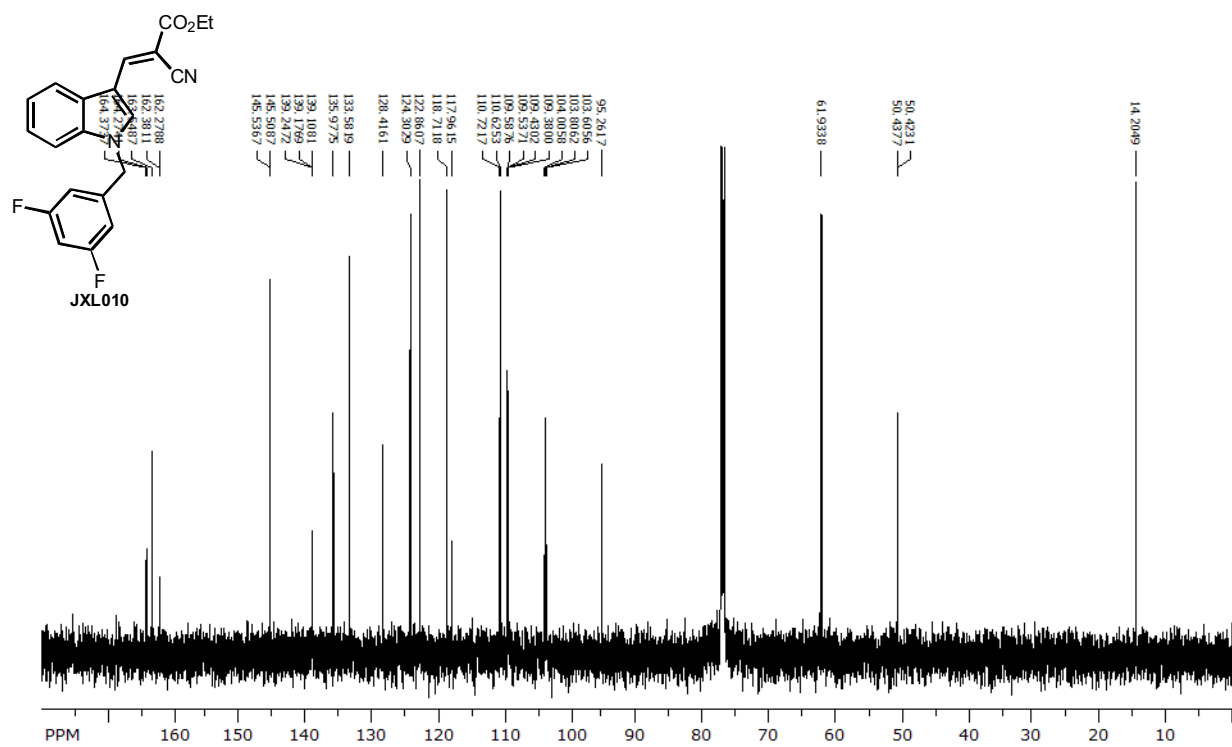

$^{13}\text{C}$  NMR (126 MHz,  $\text{CDCl}_3$ )

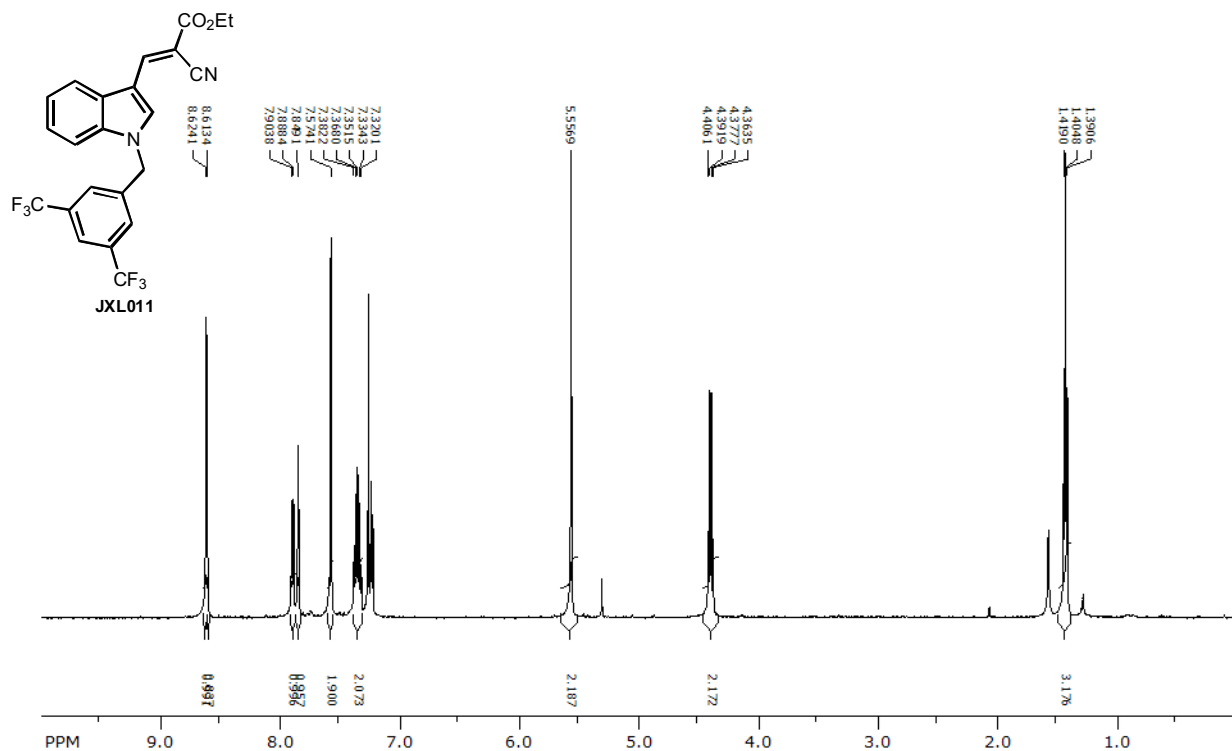

$^1\text{H}$  NMR (500 MHz,  $\text{CDCl}_3$ )

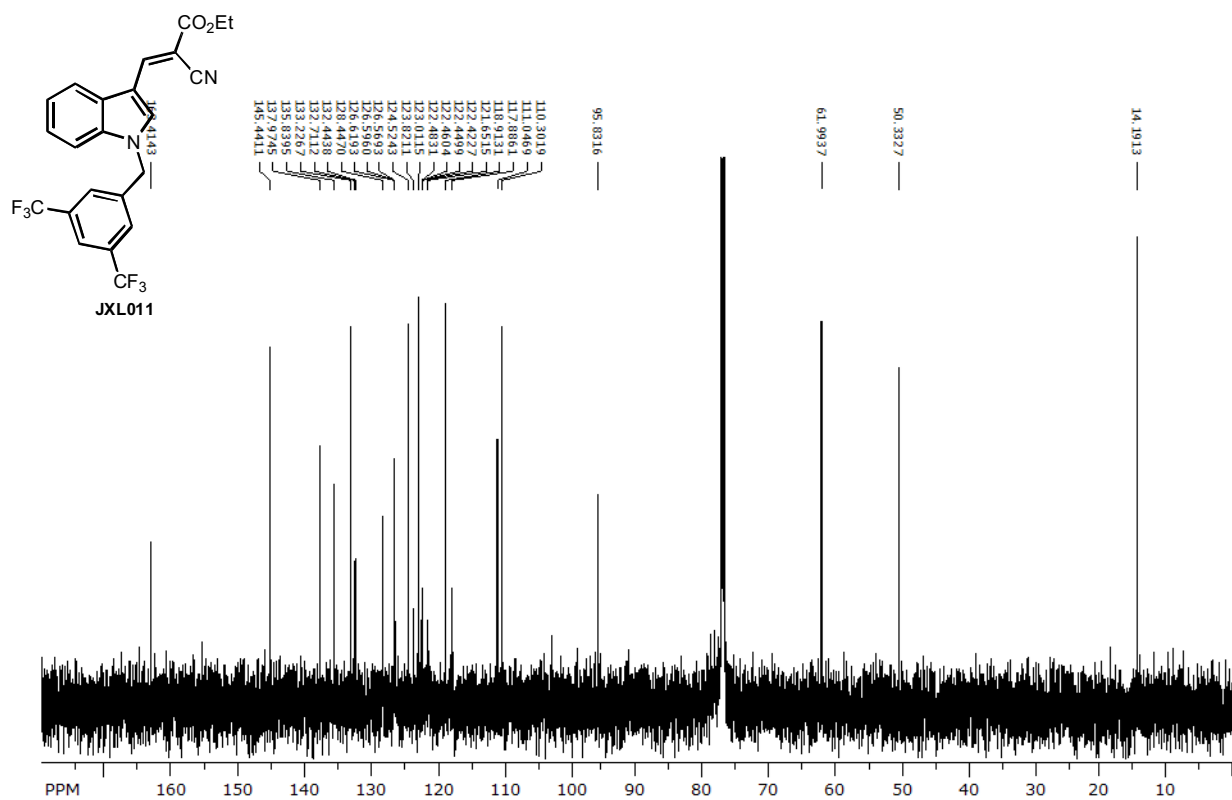

$^{13}\text{C}$  NMR (126 MHz,  $\text{CDCl}_3$ )

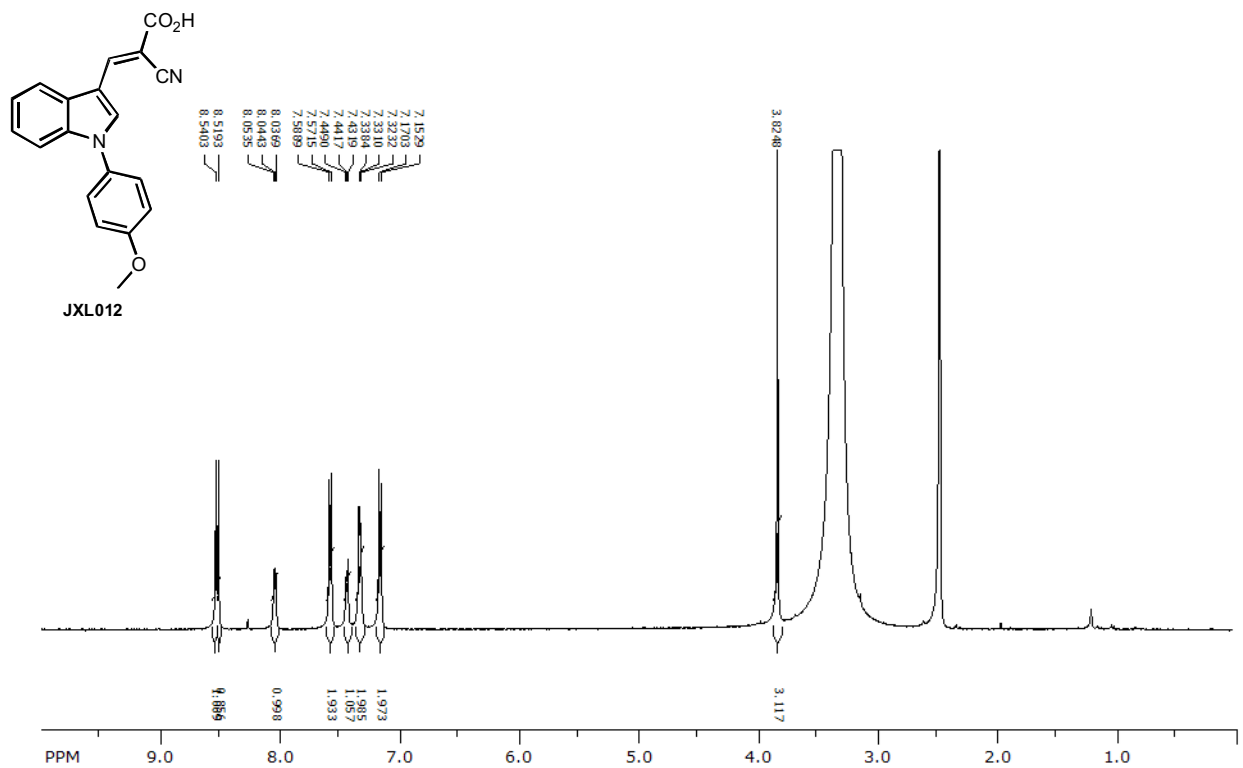

<sup>1</sup>H NMR (500 MHz, DMSO-d<sub>6</sub>)

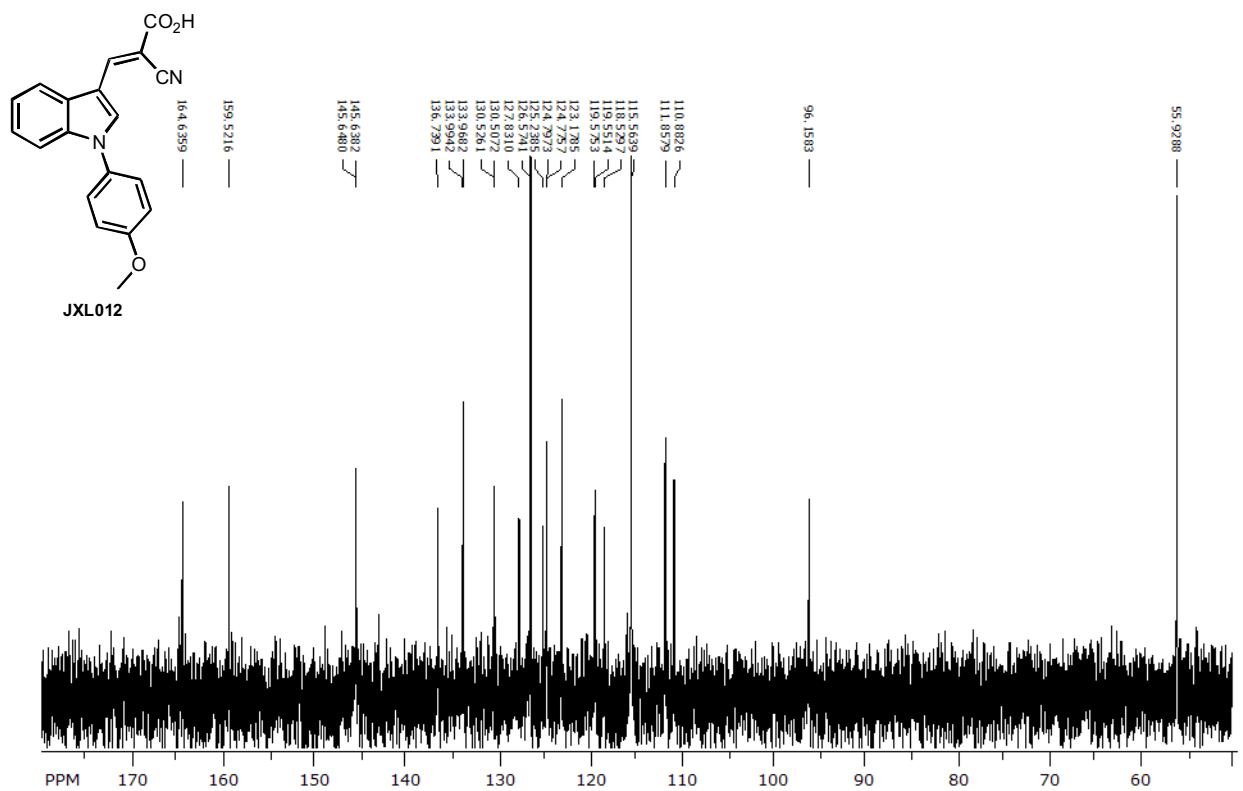

<sup>13</sup>C NMR (126 MHz, DMSO-d<sub>6</sub>)

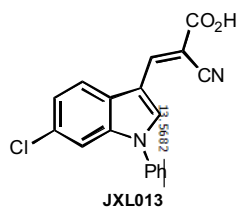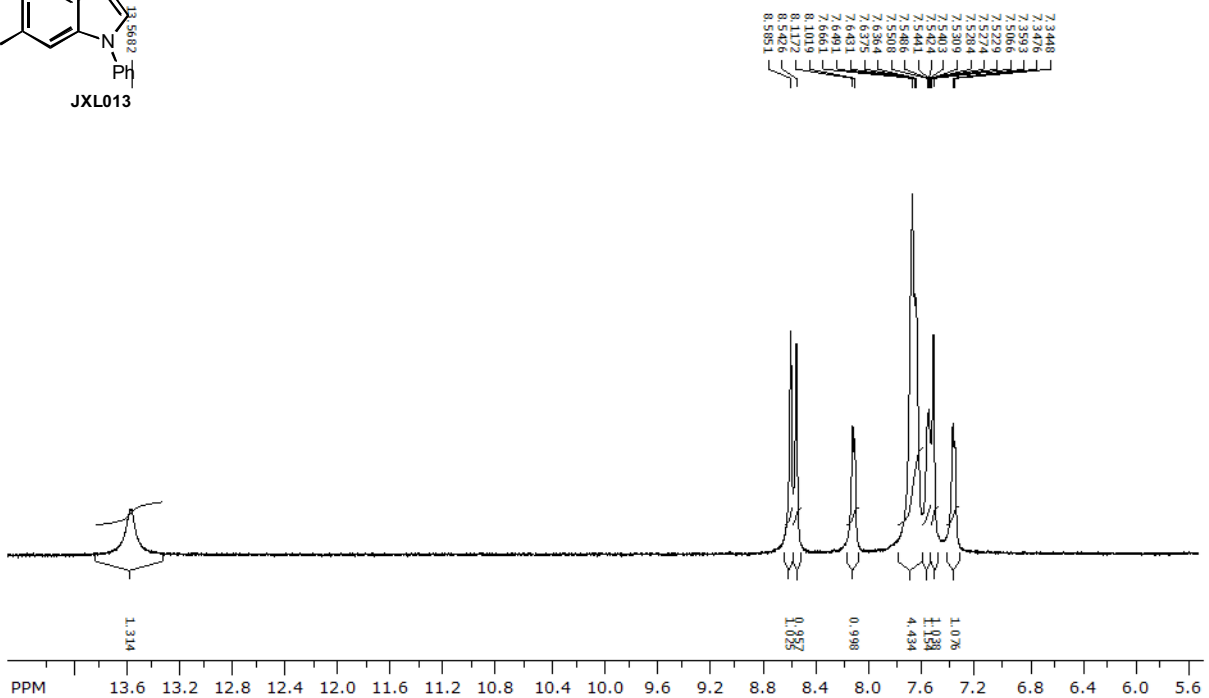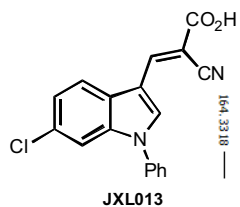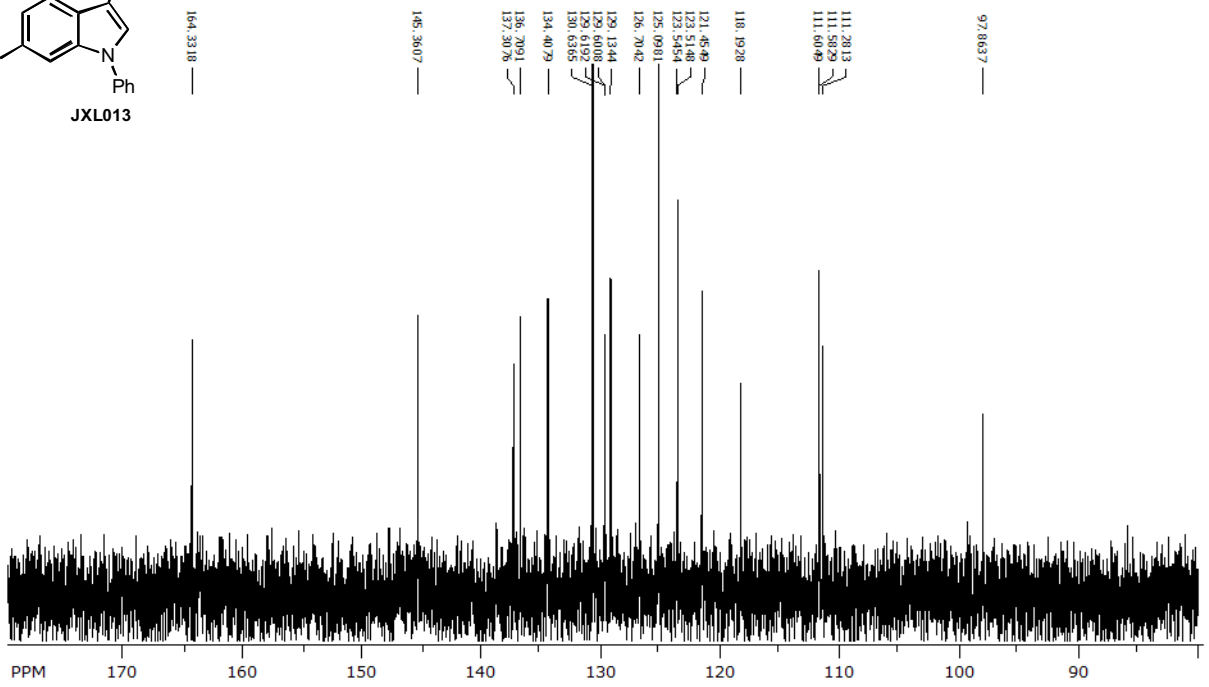

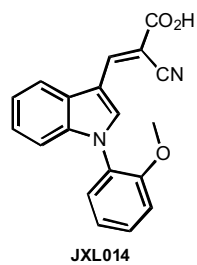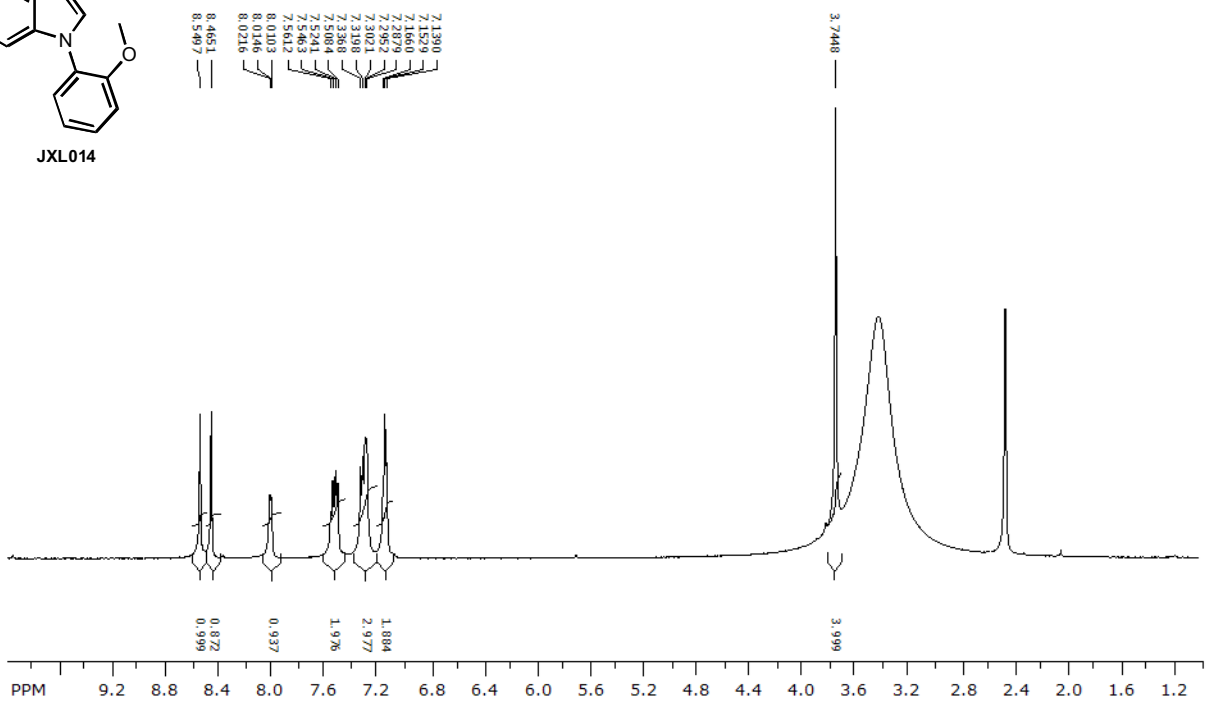

<sup>1</sup>H NMR (500 MHz, DMSO-d<sub>6</sub>)

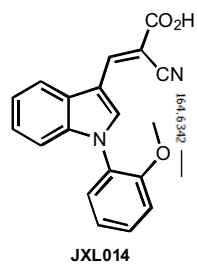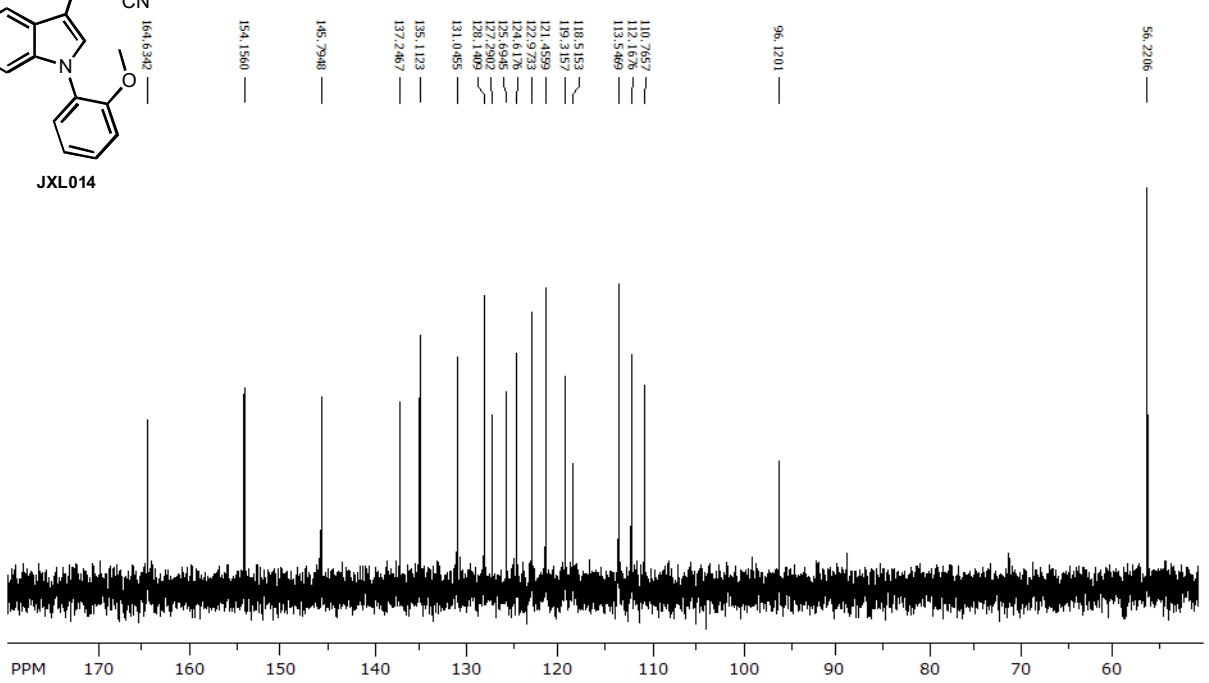

<sup>13</sup>C NMR (126 MHz, DMSO-d<sub>6</sub>)

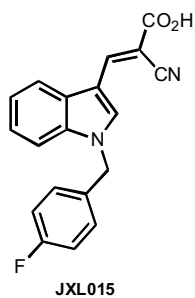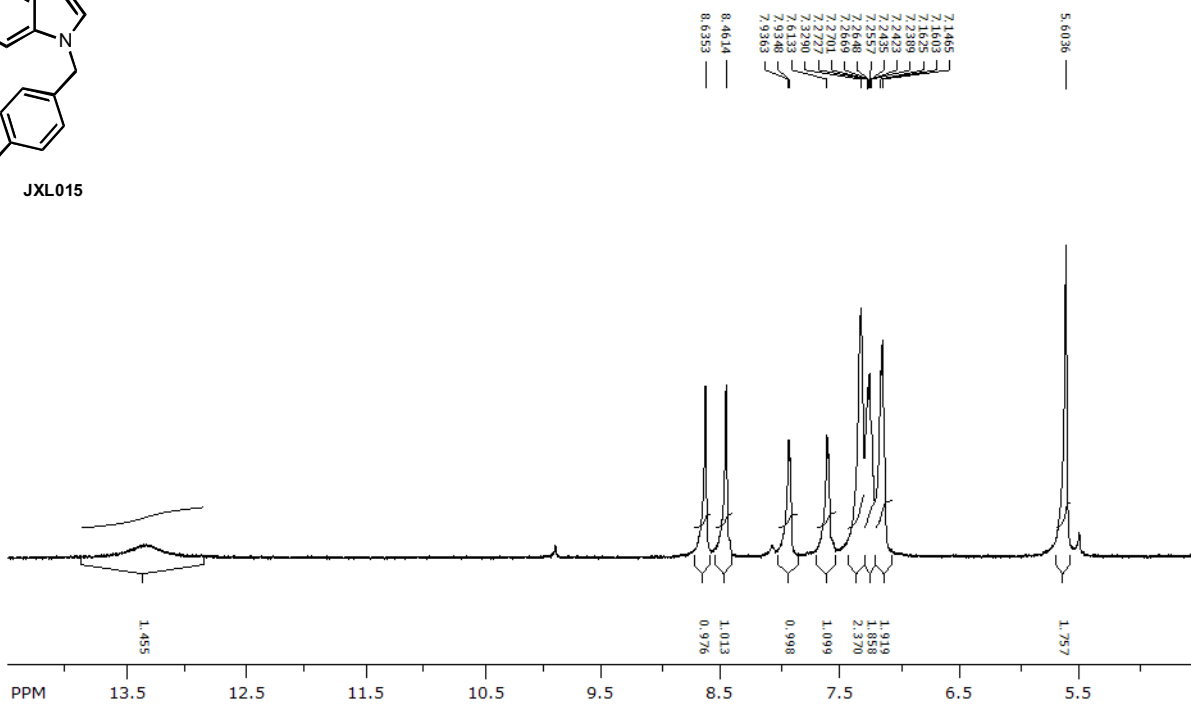

**<sup>1</sup>H NMR (500 MHz, DMSO-d<sub>6</sub>)**

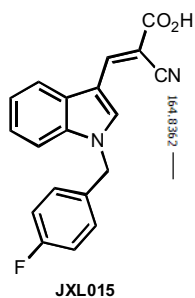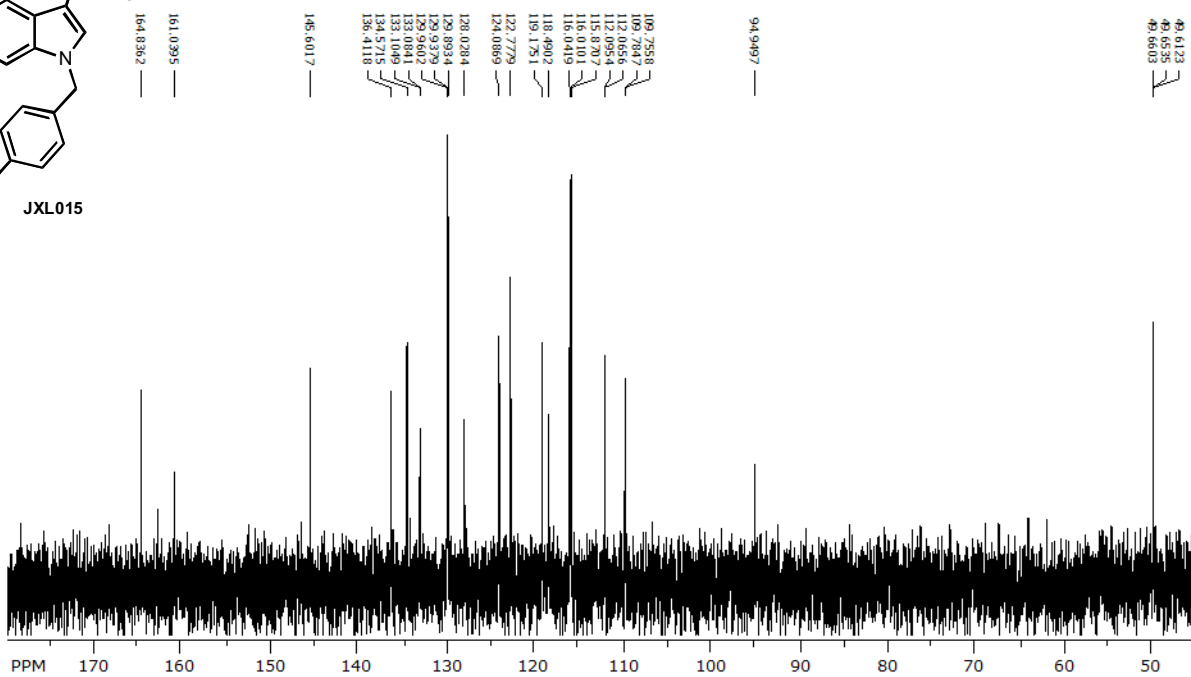

**<sup>13</sup>C NMR (126 MHz, DMSO-d<sub>6</sub>)**



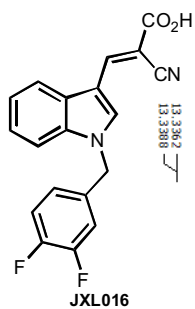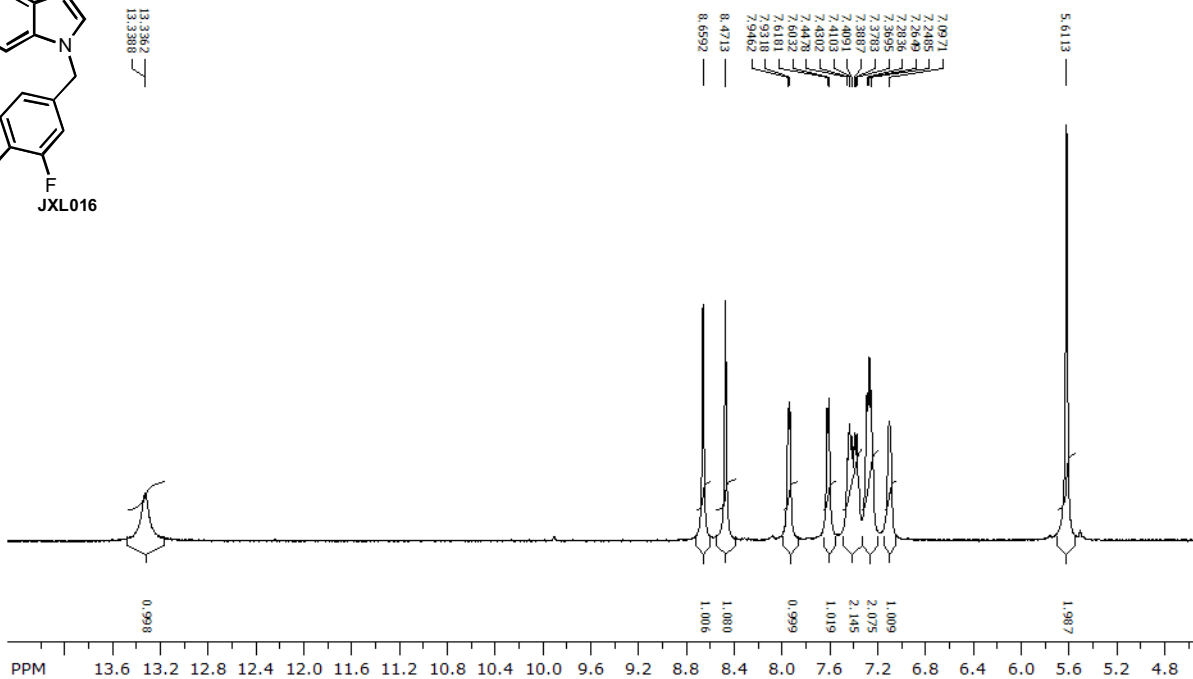

<sup>1</sup>H NMR (500 MHz, DMSO-d<sub>6</sub>)

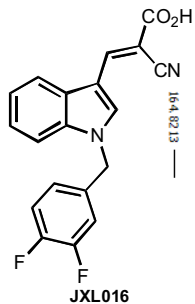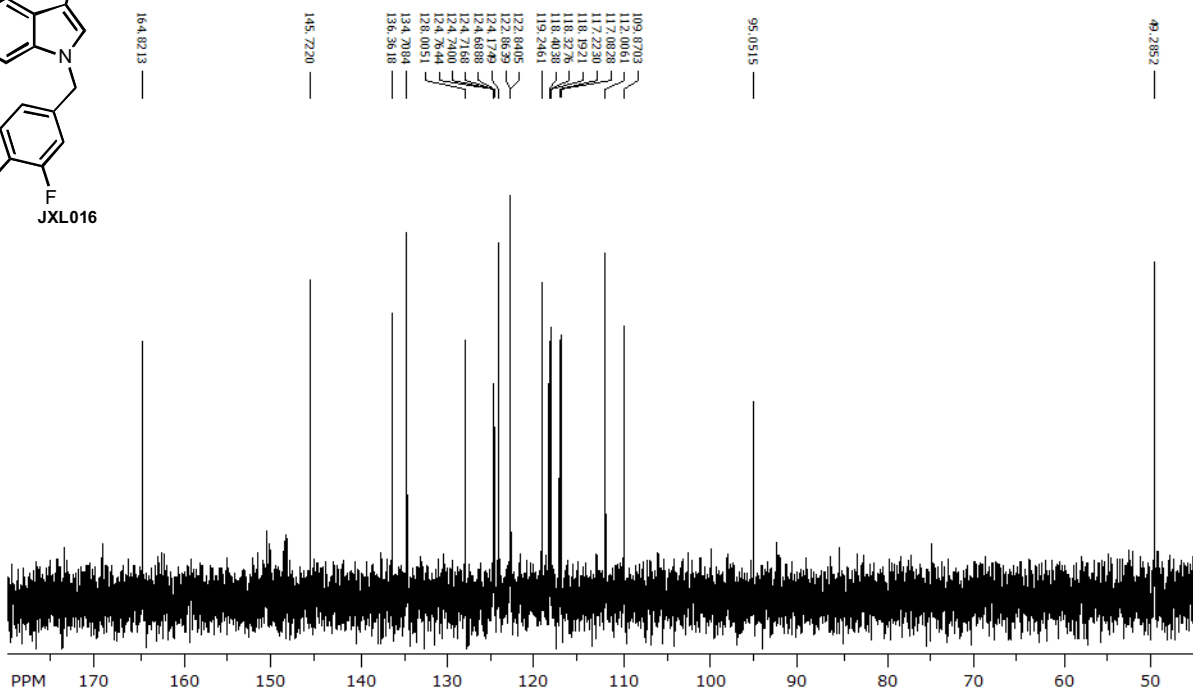

<sup>13</sup>C NMR (126 MHz, DMSO-d<sub>6</sub>)

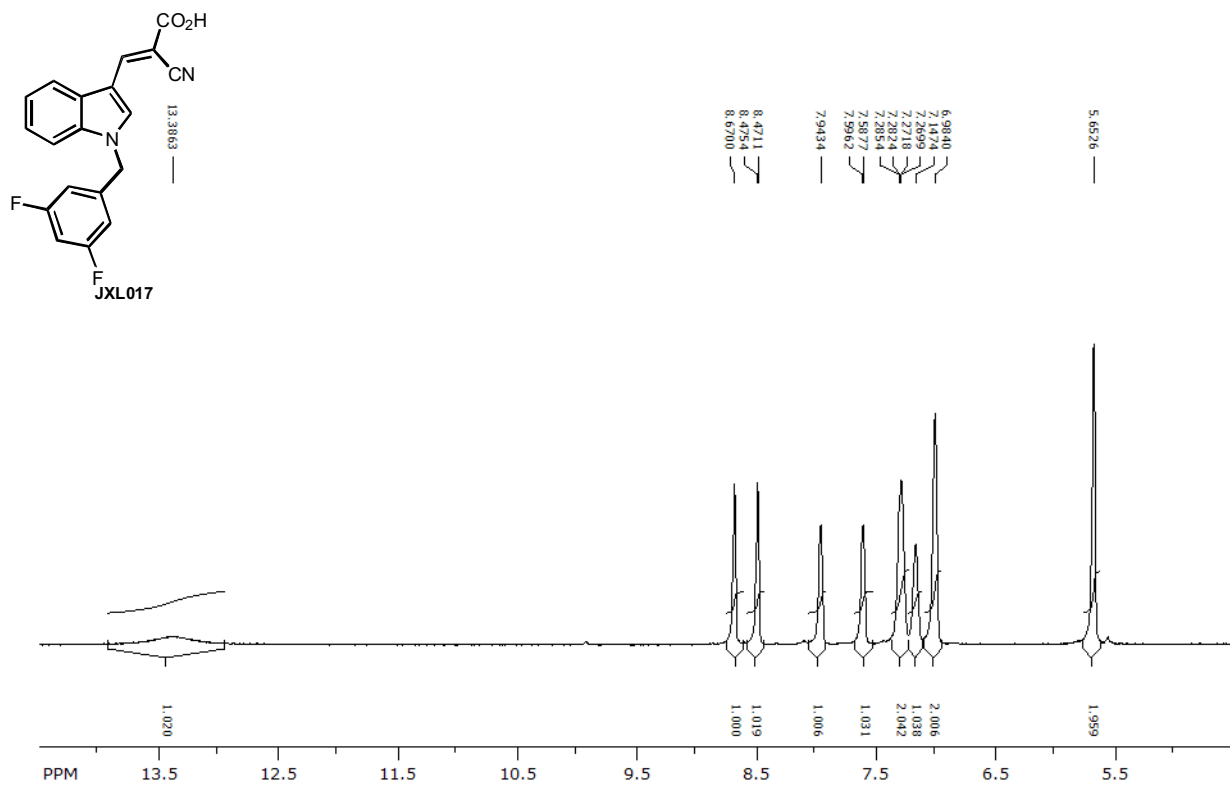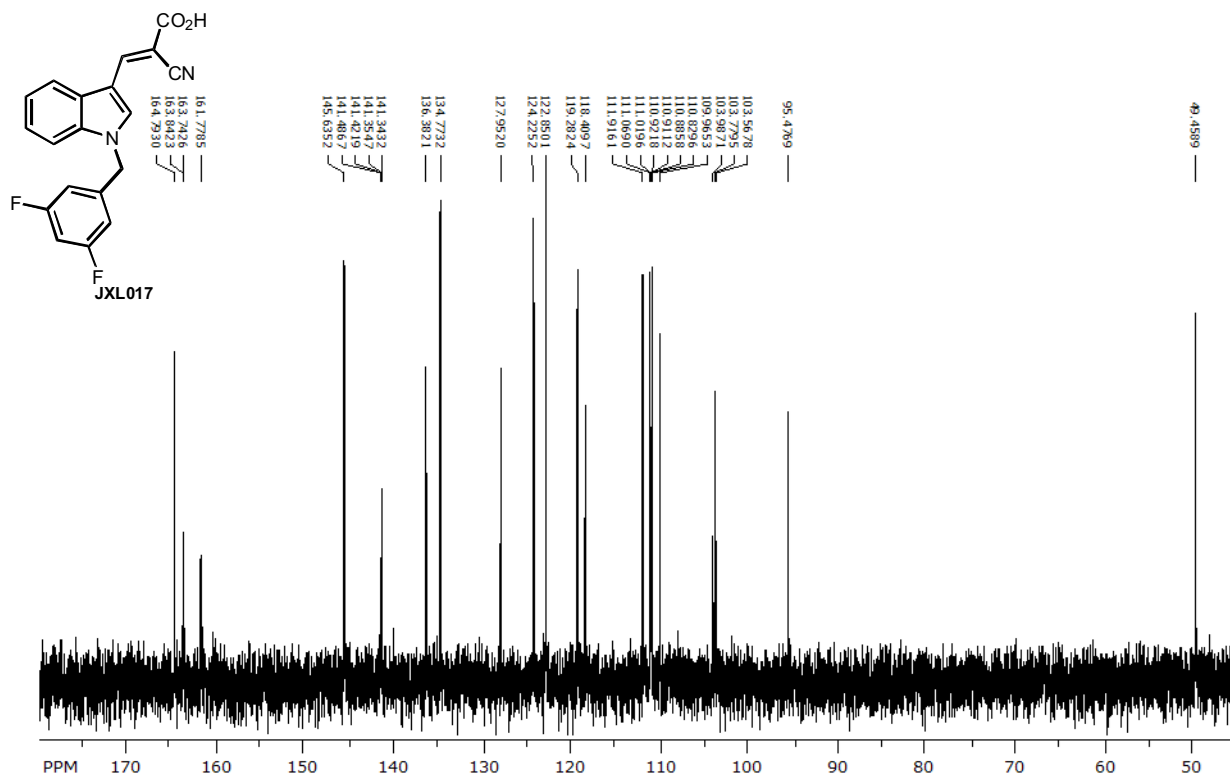

**<sup>13</sup>C NMR (126 MHz, DMSO-d<sub>6</sub>)**

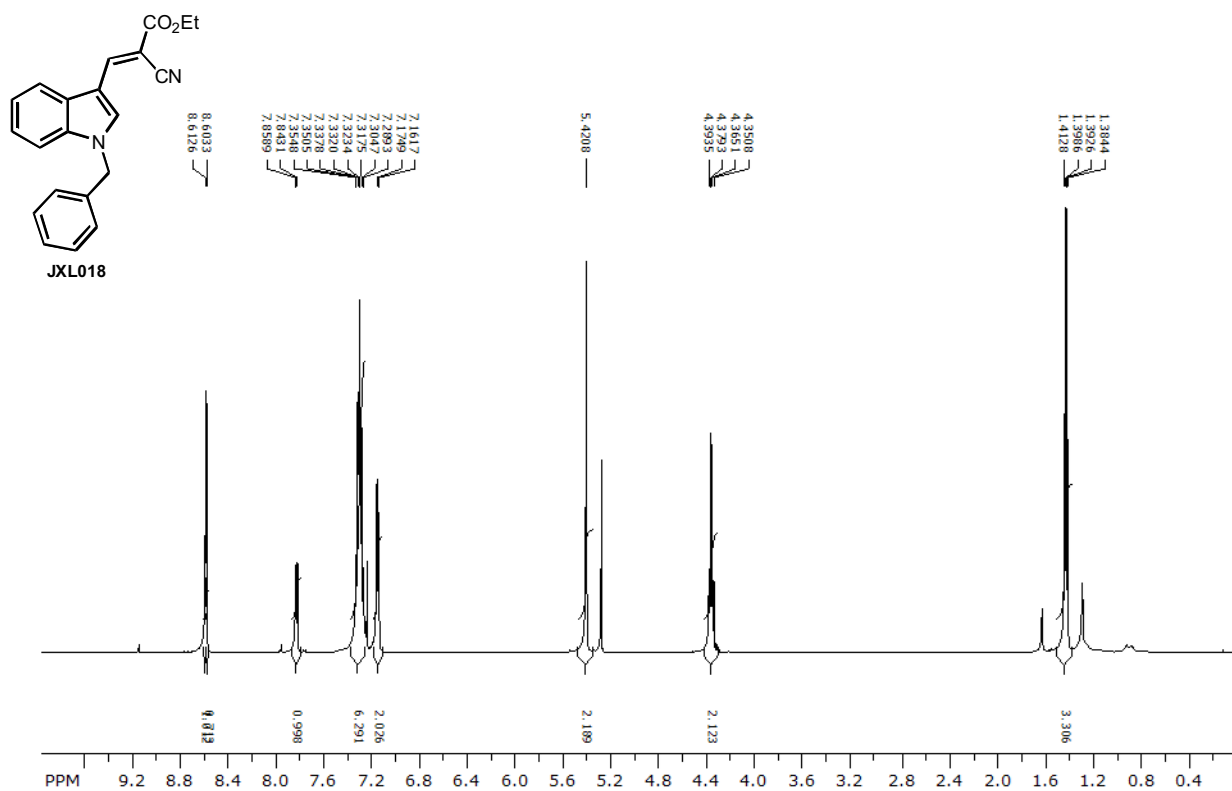

<sup>1</sup>H NMR (500 MHz, CDCl<sub>3</sub>)

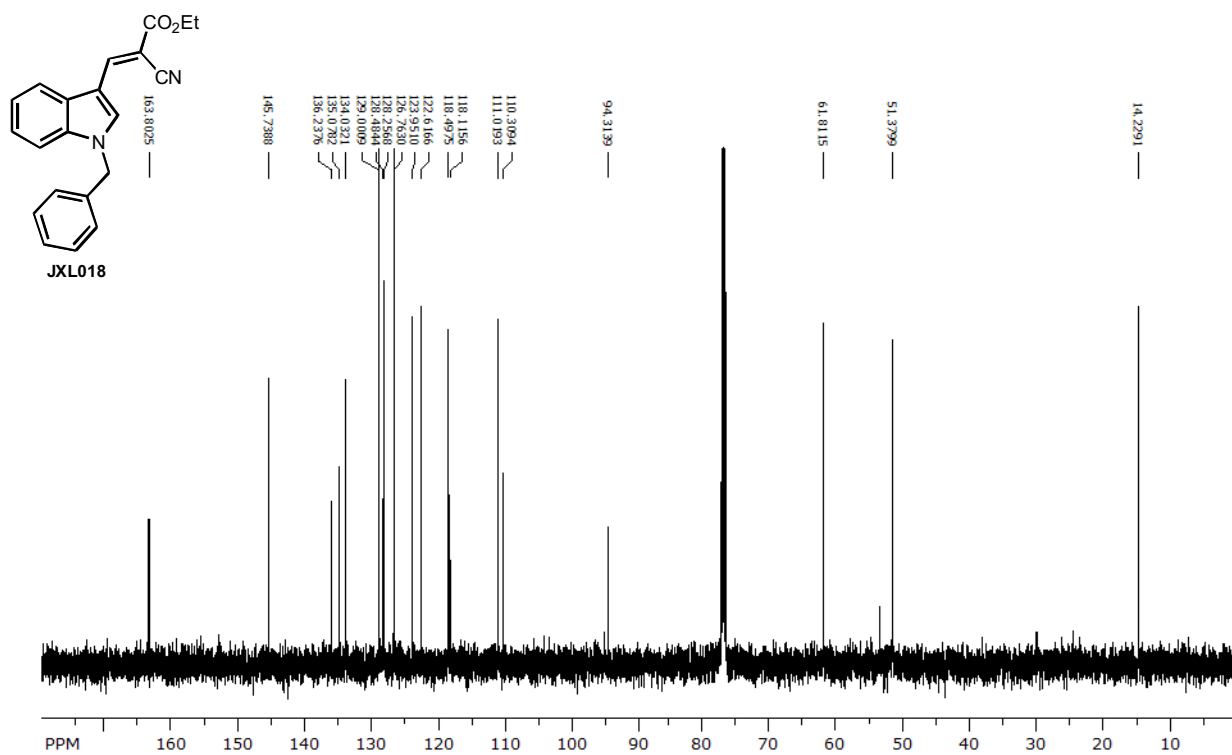

<sup>13</sup>C NMR (126 MHz, CDCl<sub>3</sub>)

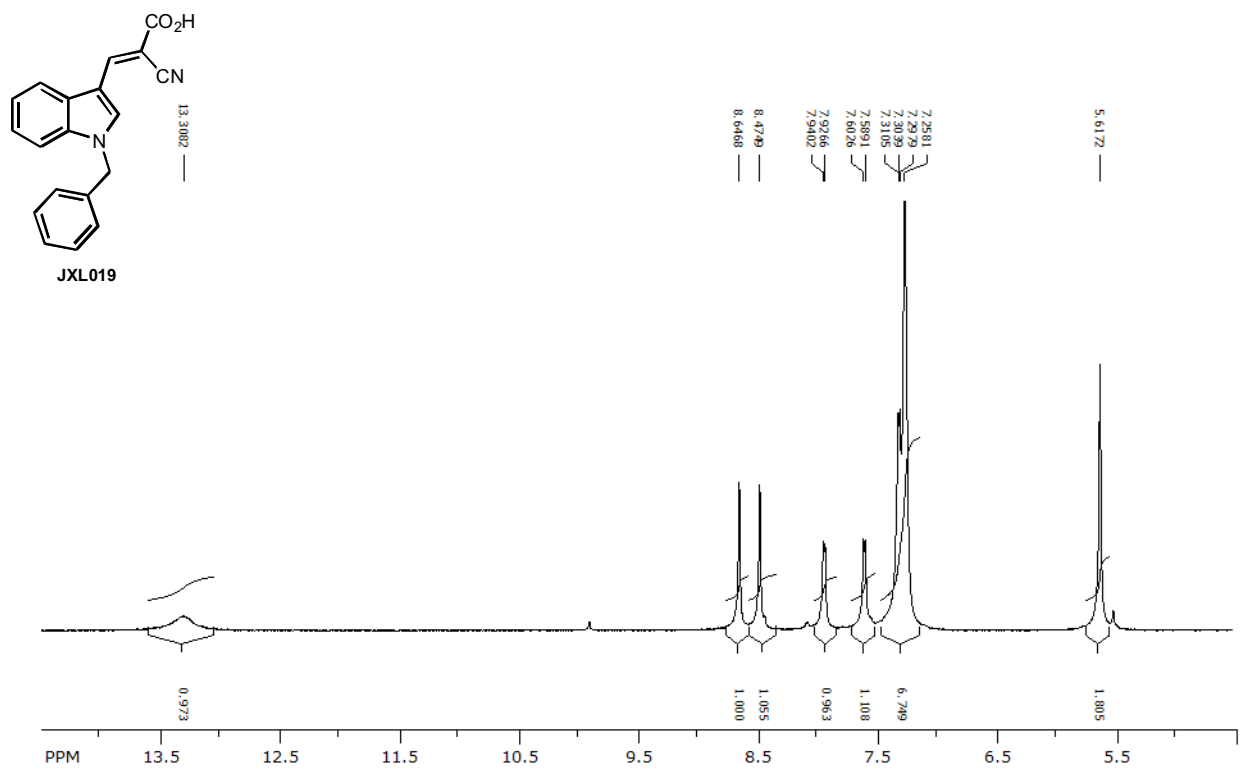

$^1\text{H}$  NMR (500 MHz, DMSO- $d_6$ )

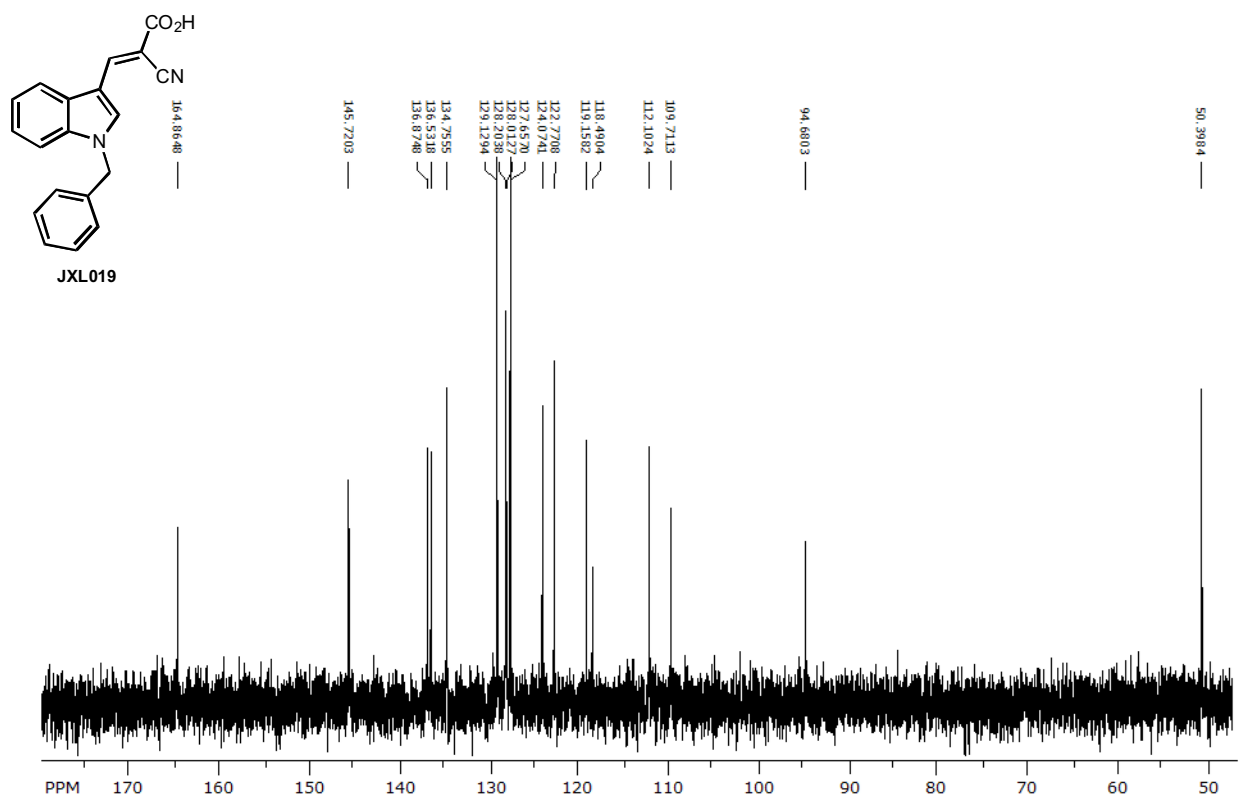

$^{13}\text{C}$  NMR (126 MHz, DMSO- $d_6$ )

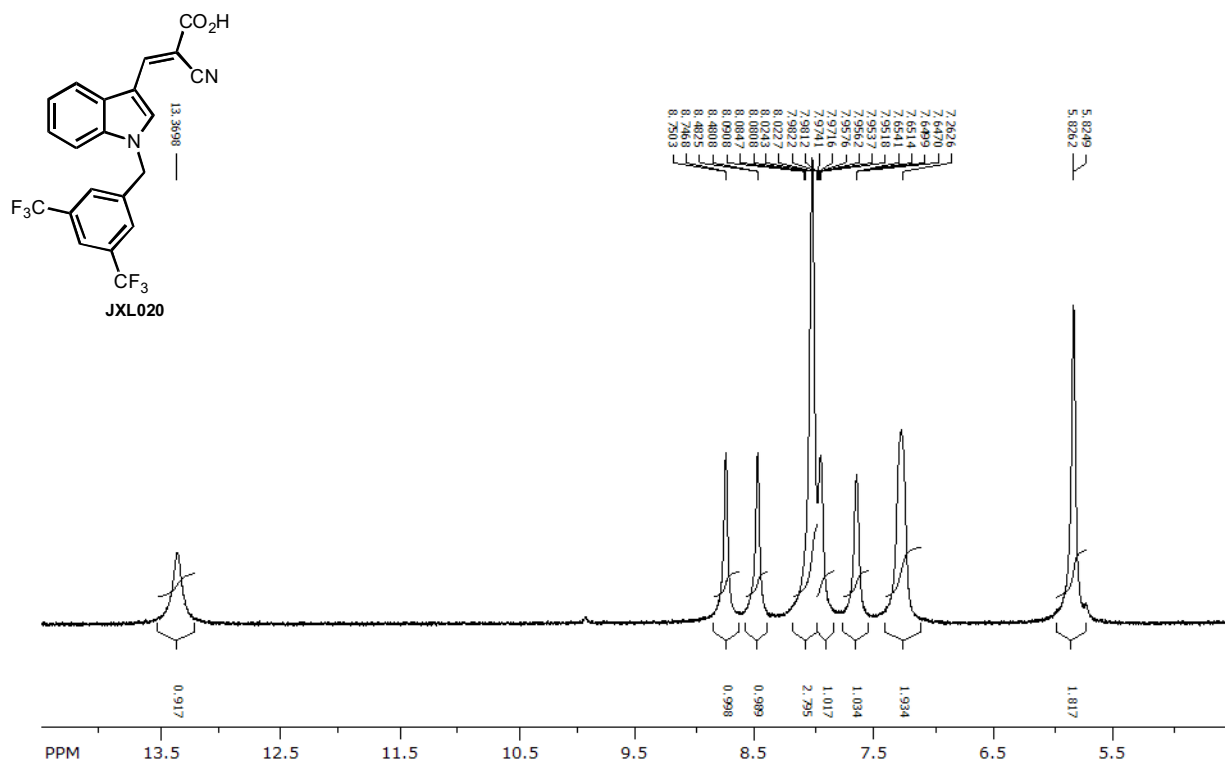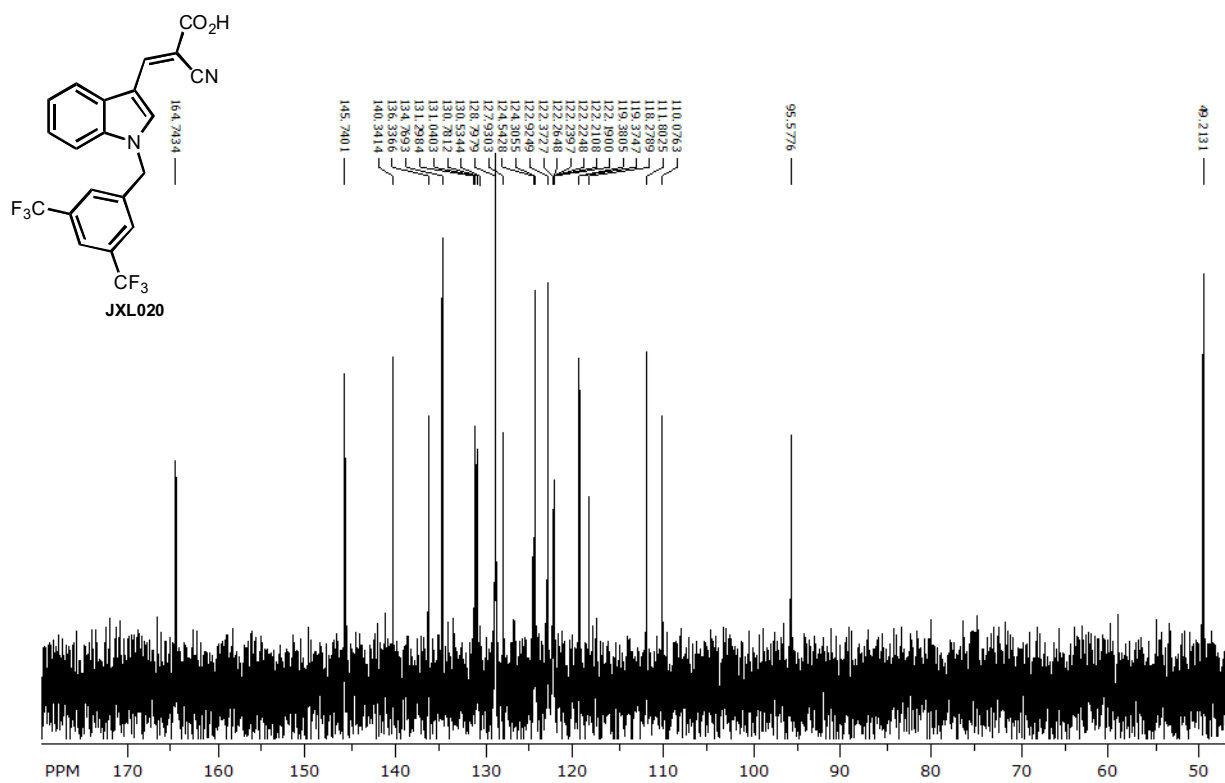

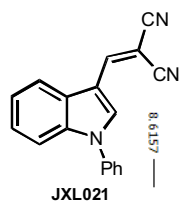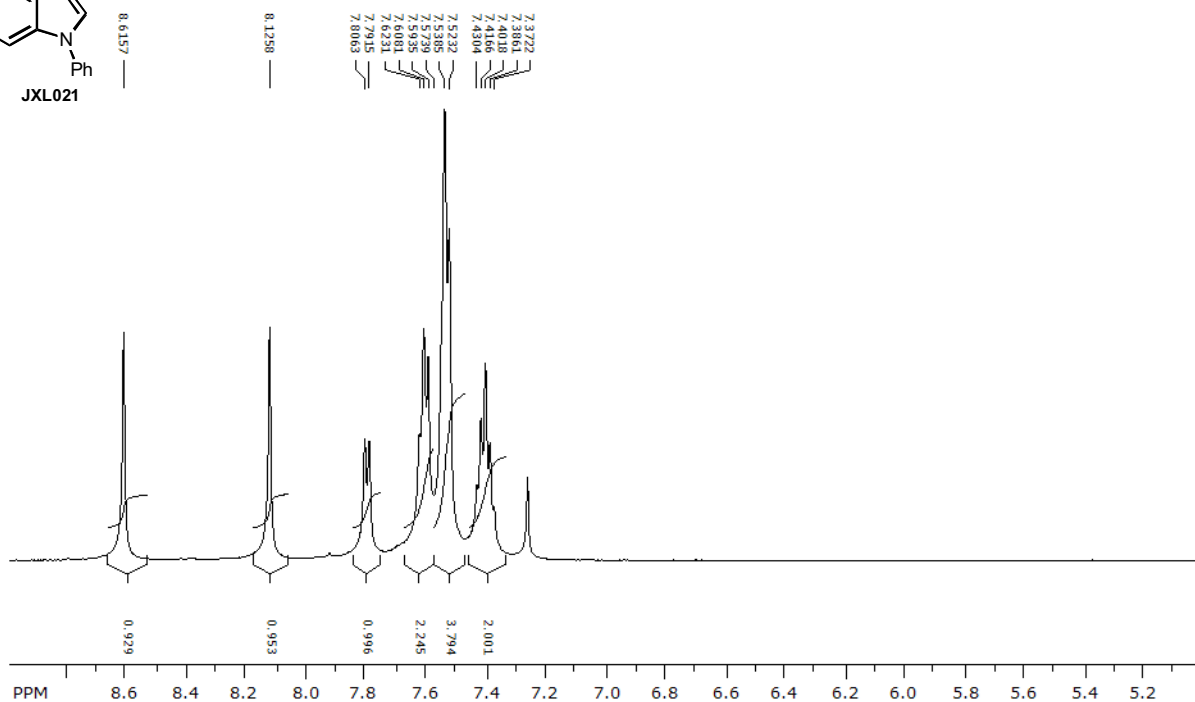

<sup>1</sup>H NMR (500 MHz, CDCl<sub>3</sub>)

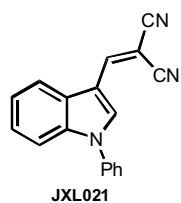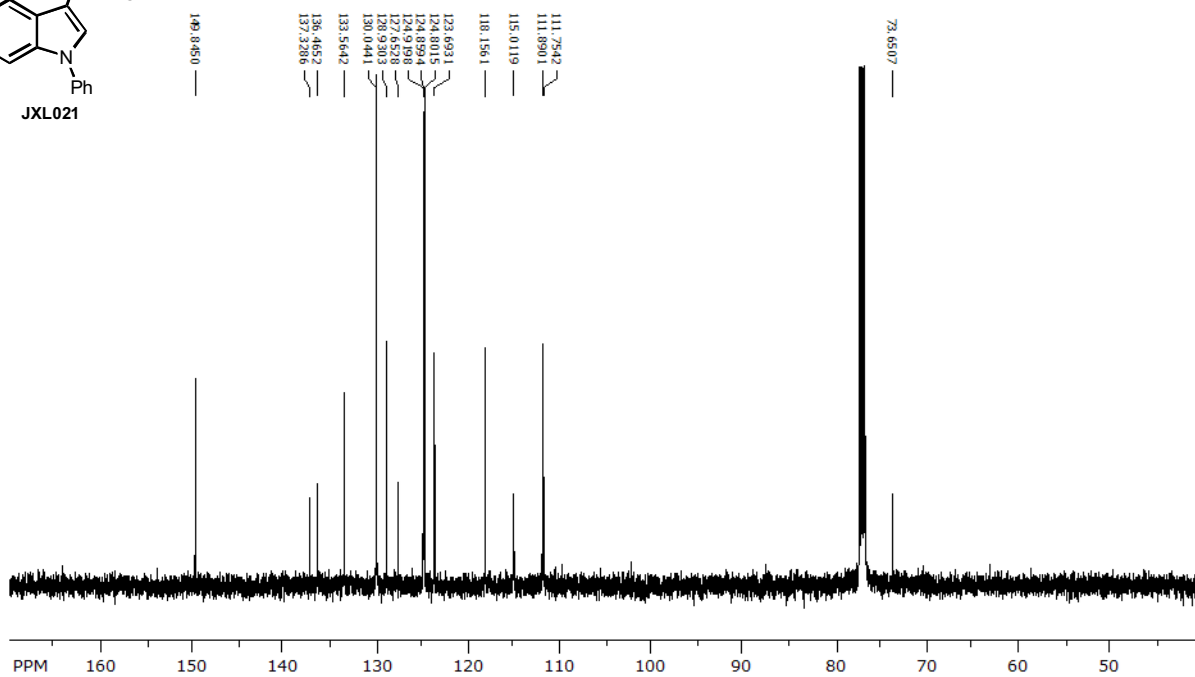

<sup>13</sup>C NMR (126 MHz, CDCl<sub>3</sub>)

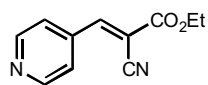

JXL022

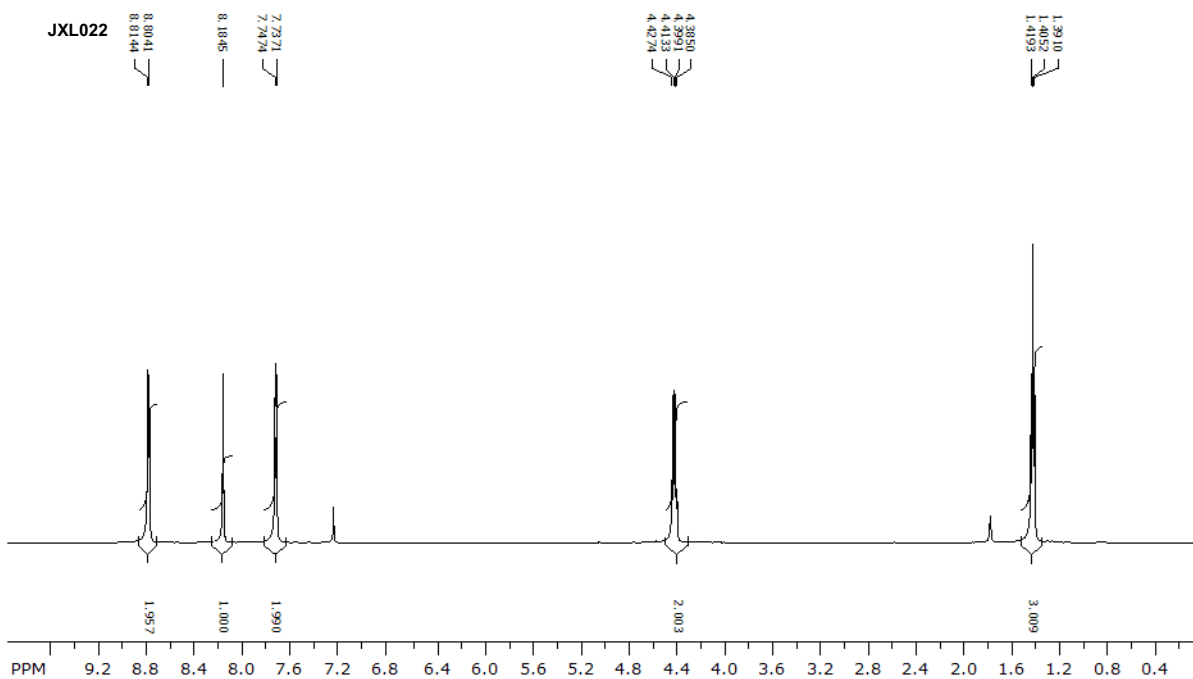

<sup>1</sup>H NMR (500 MHz, CDCl<sub>3</sub>)

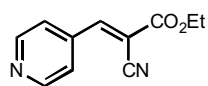

JXL022

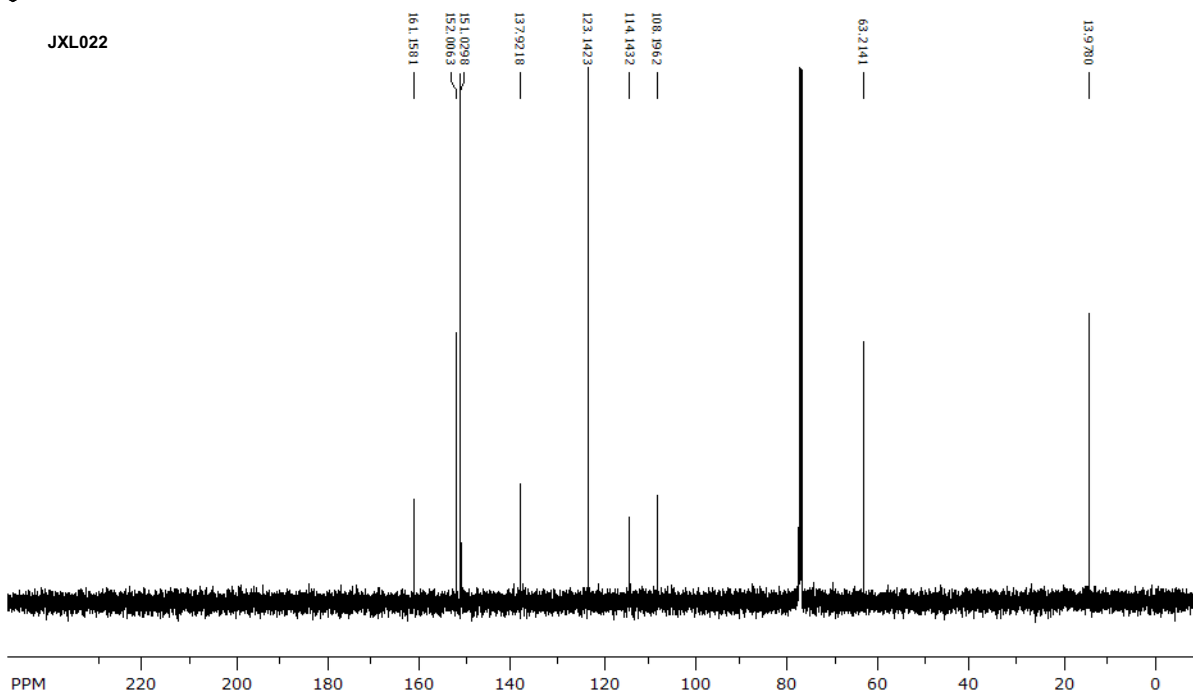

<sup>13</sup>C NMR (126 MHz, CDCl<sub>3</sub>)





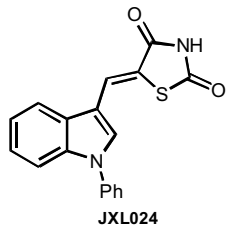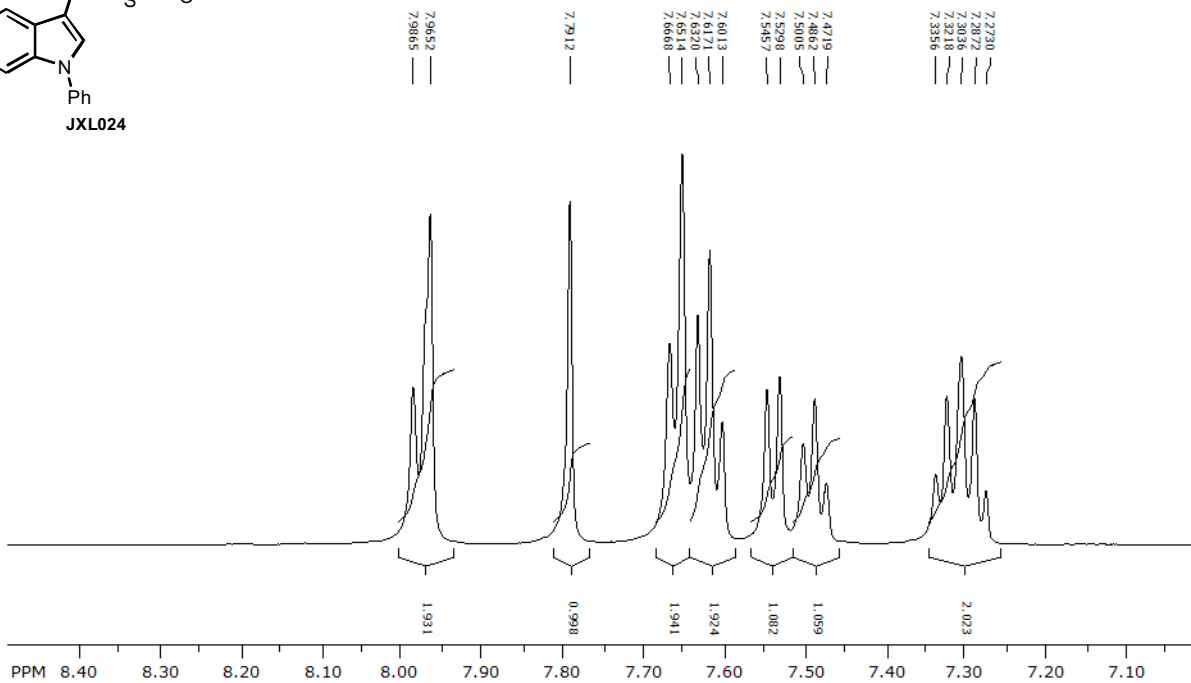

**<sup>1</sup>H NMR (500 MHz, DMSO-d<sub>6</sub>)**

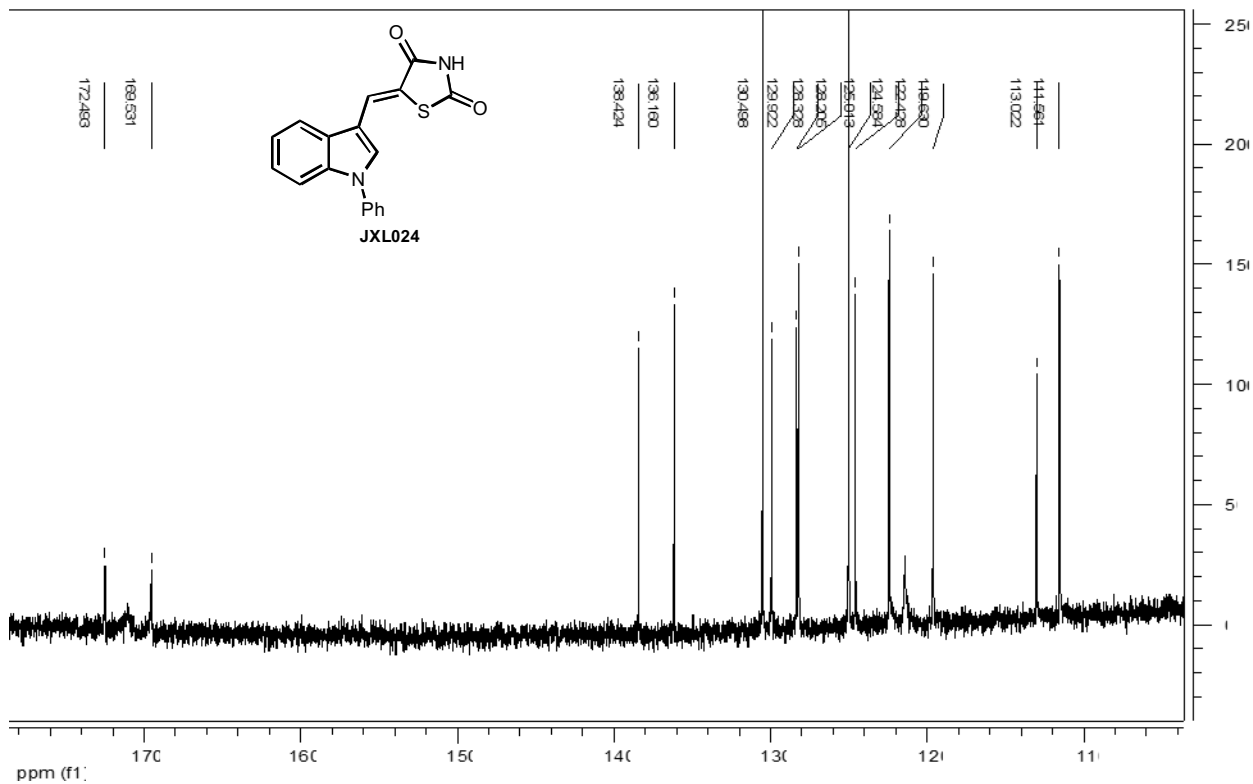

**<sup>13</sup>C NMR (126 MHz, DMSO-d<sub>6</sub>)**

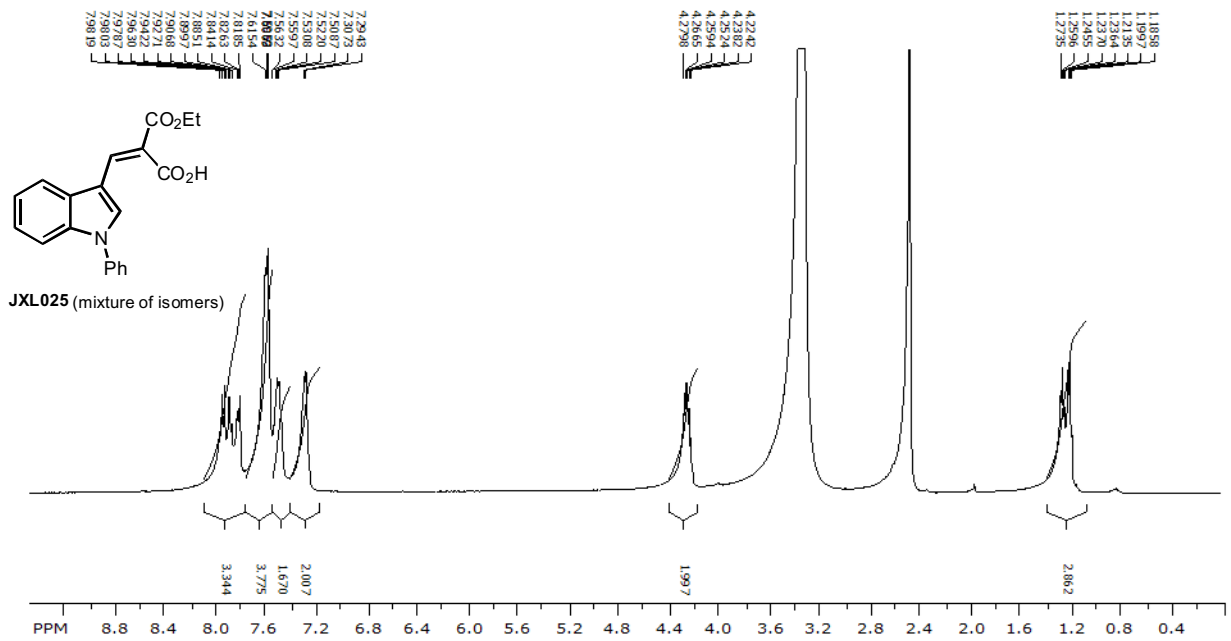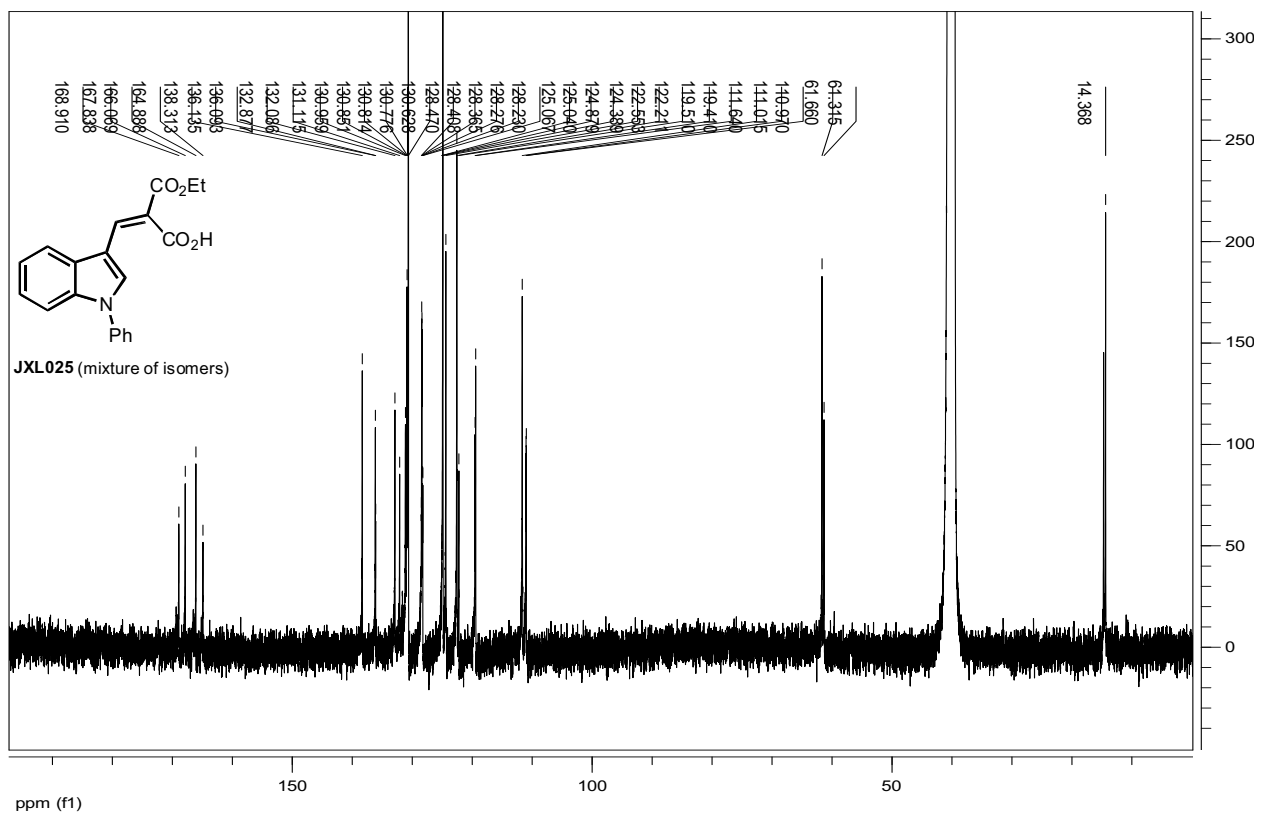

**<sup>13</sup>C NMR (126 MHz, DMSO-d<sub>6</sub>)**

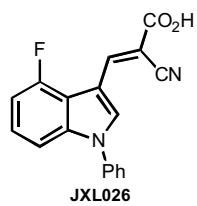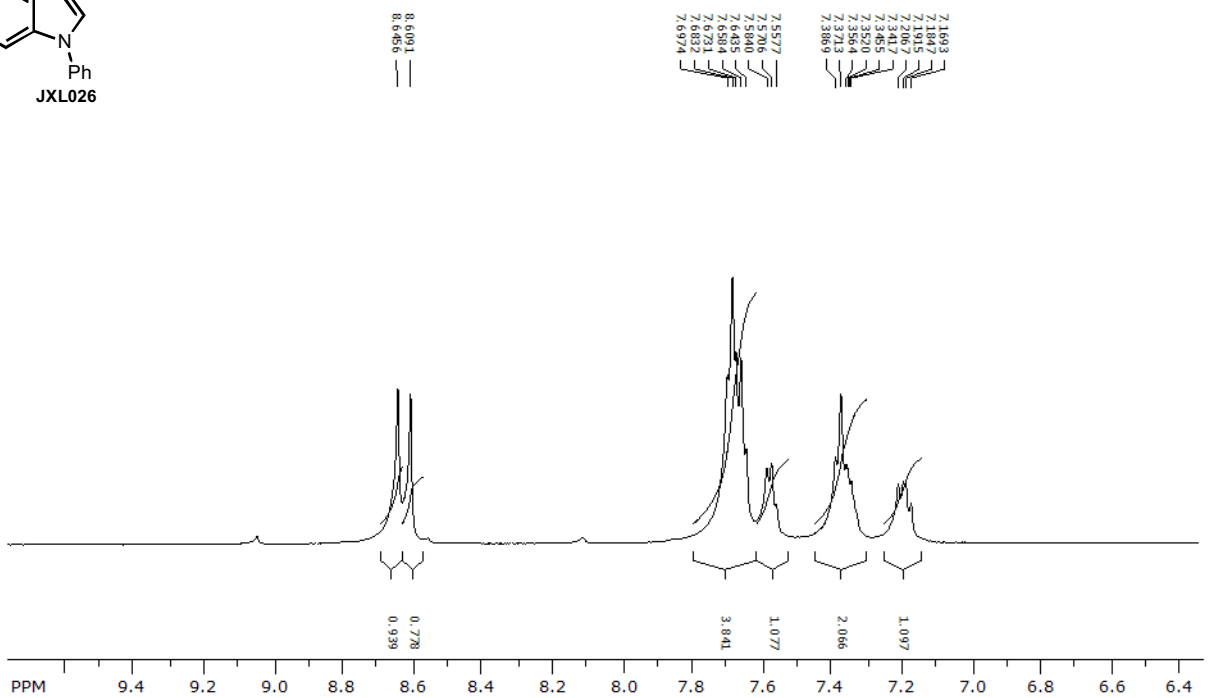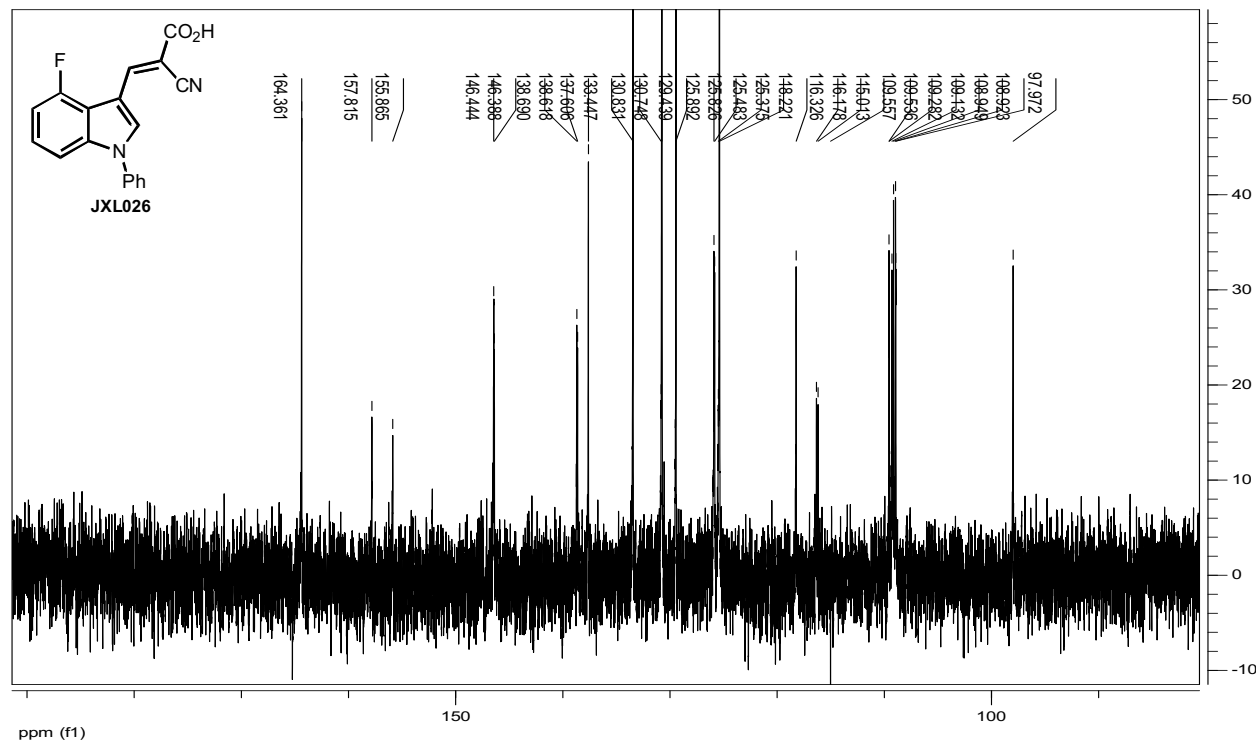

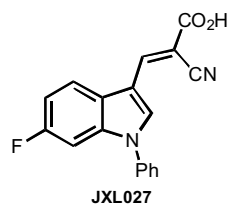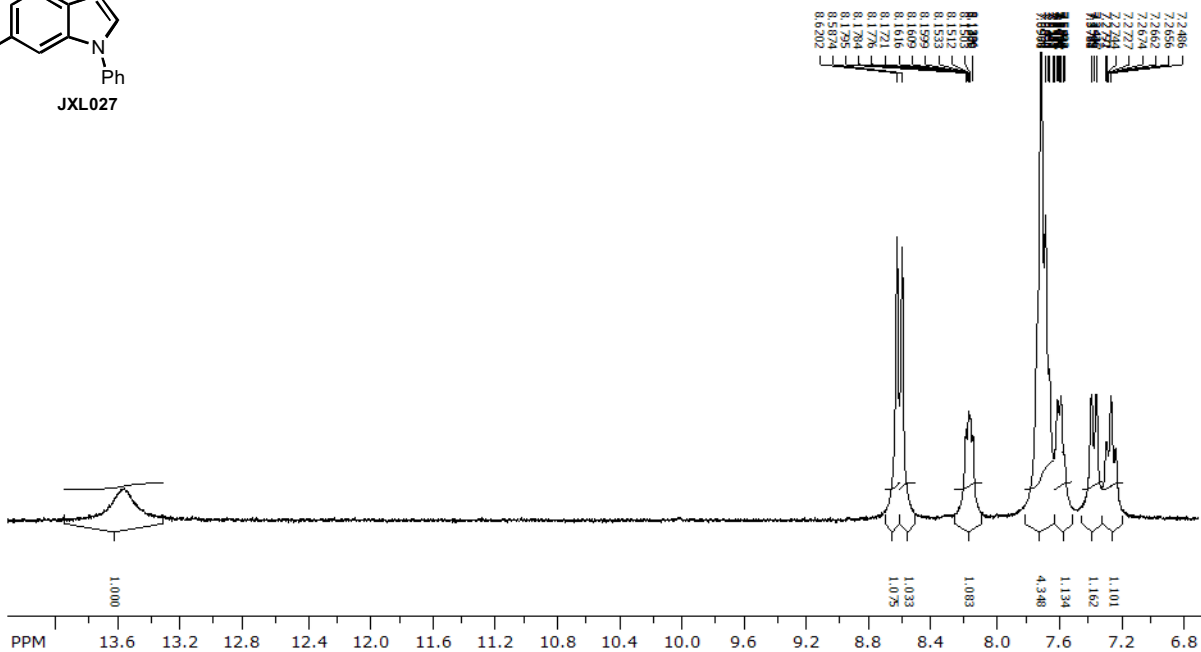

**<sup>1</sup>H NMR (500 MHz, DMSO-d<sub>6</sub>)**

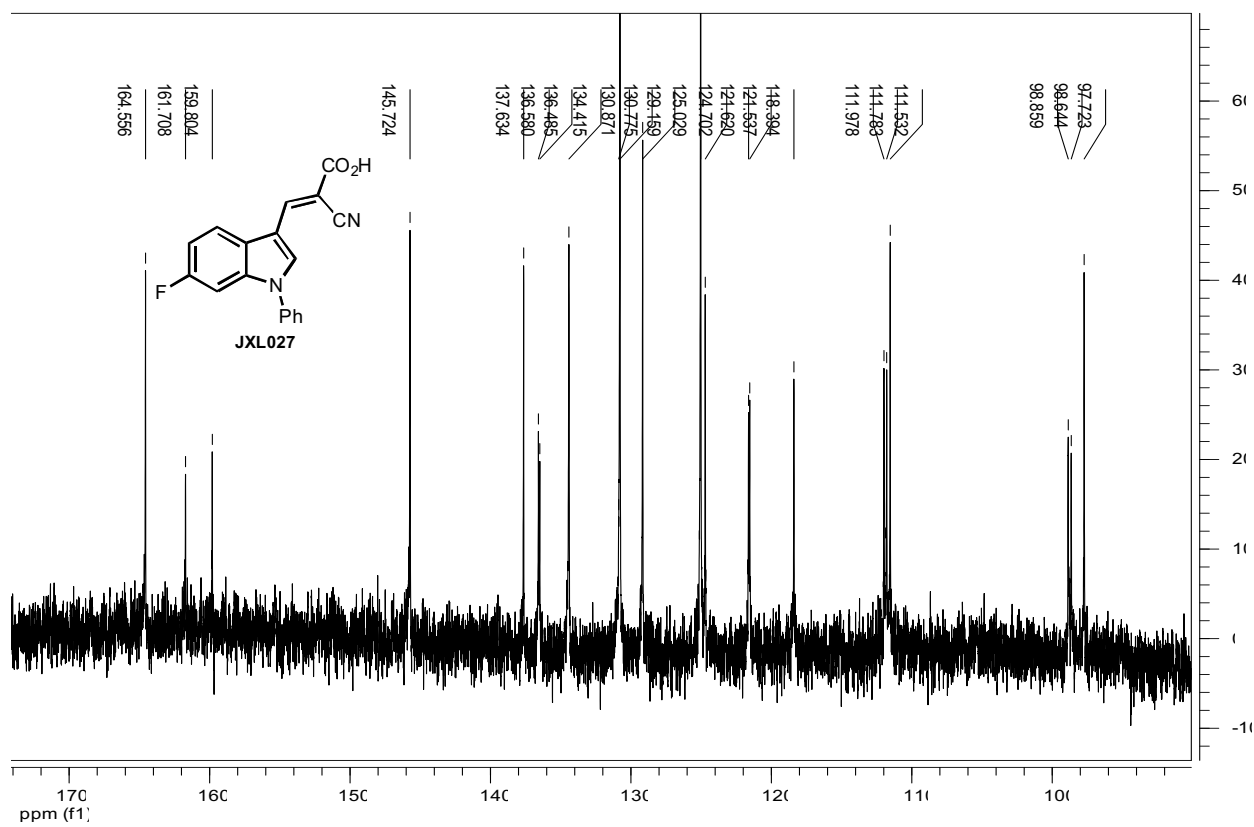

**<sup>13</sup>C NMR (126 MHz, DMSO-d<sub>6</sub>)**



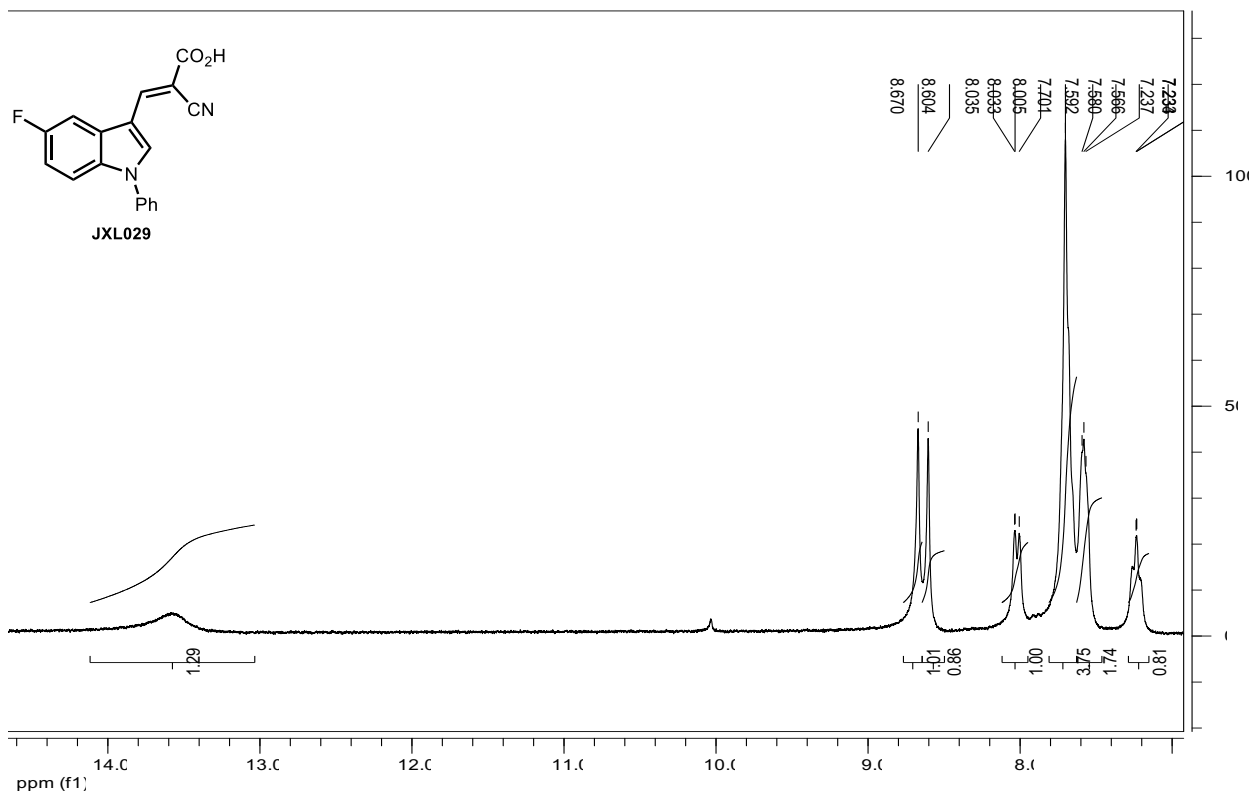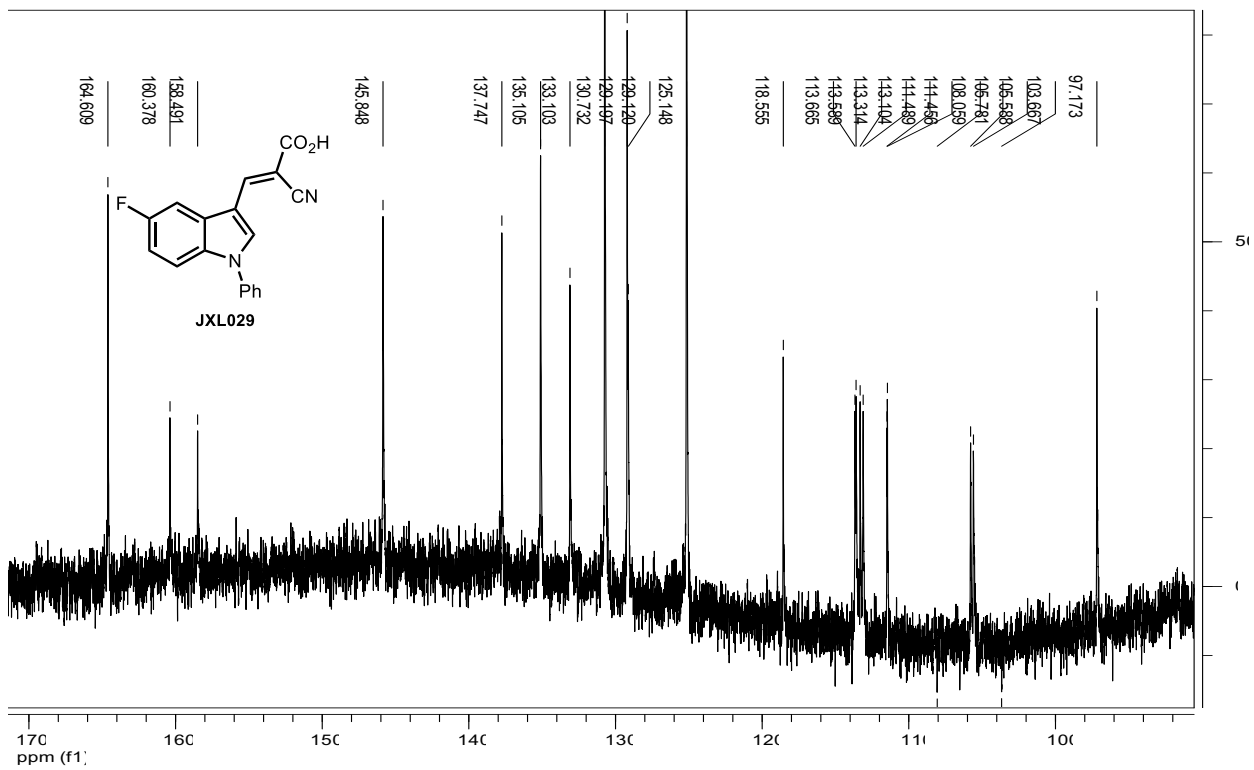

**<sup>13</sup>C NMR (126 MHz, DMSO-d<sub>6</sub>)**

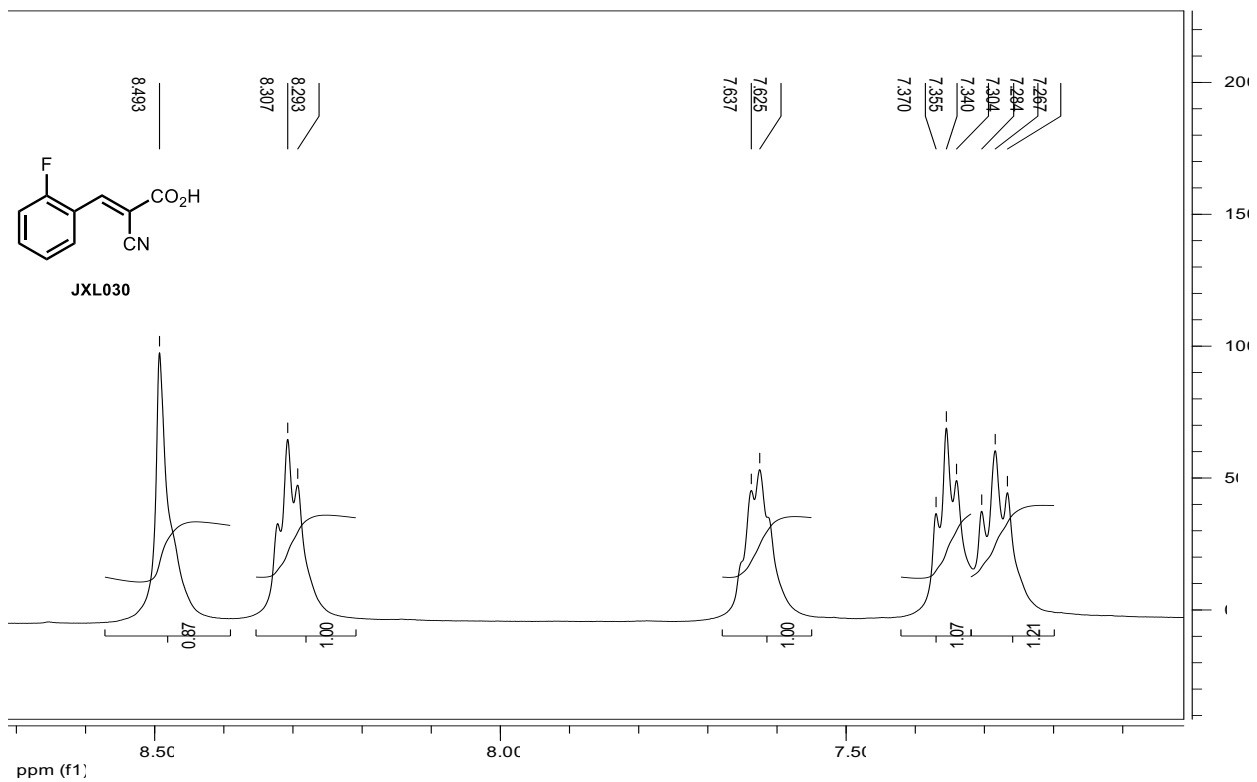

<sup>1</sup>H NMR (500 MHz, DMSO-d<sub>6</sub>)

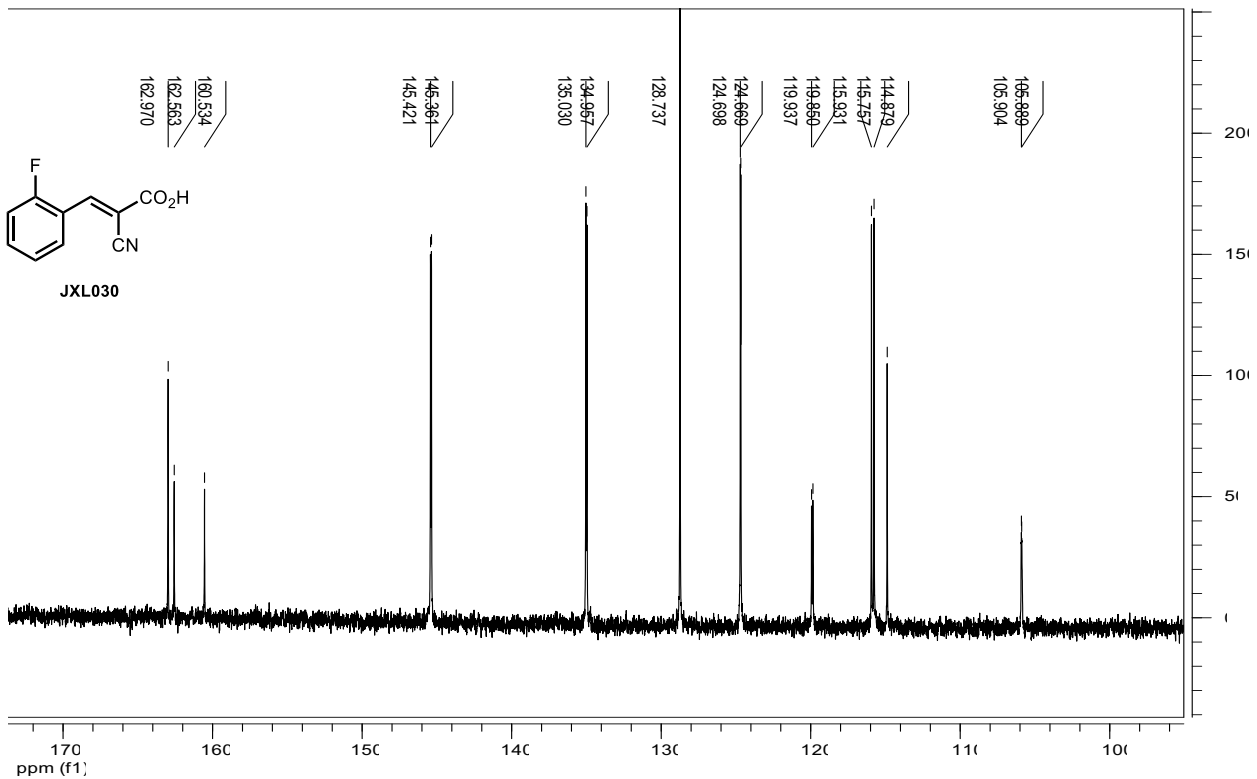

<sup>13</sup>C NMR (126 MHz, DMSO-d<sub>6</sub>)

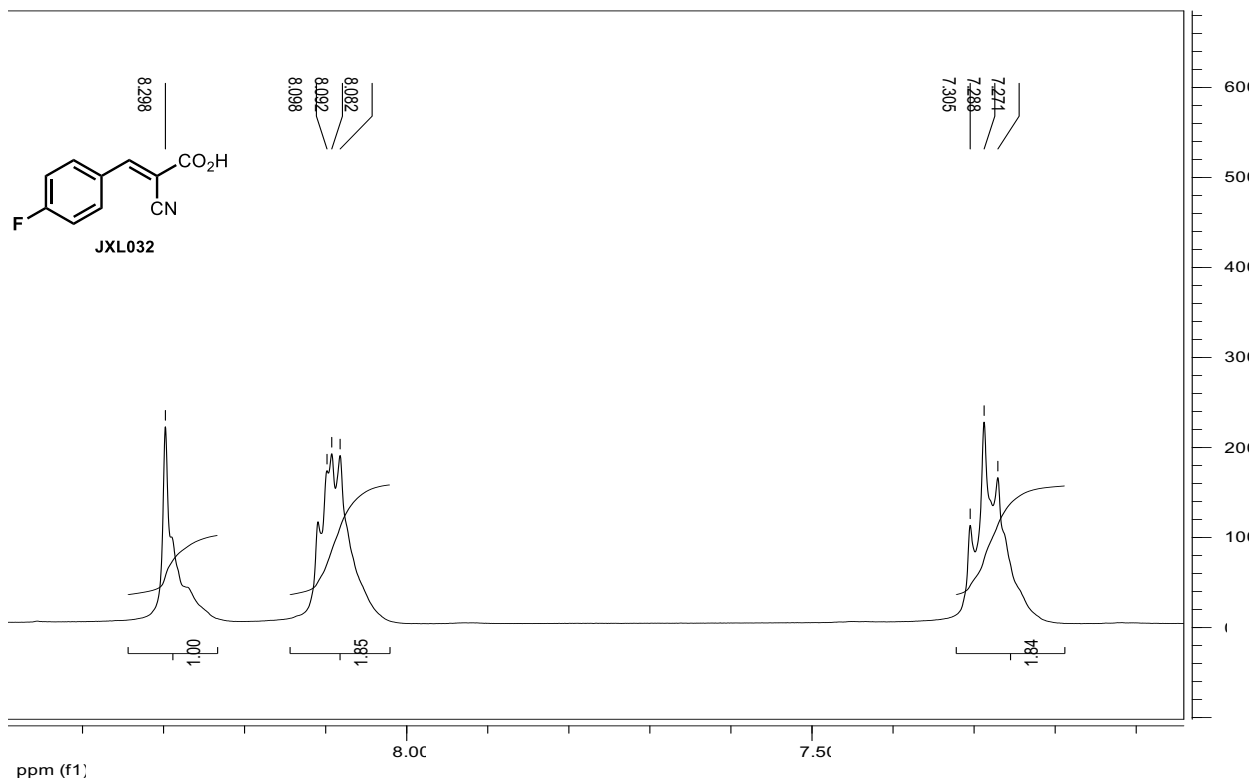

<sup>1</sup>H NMR (500 MHz, DMSO-d<sub>6</sub>)

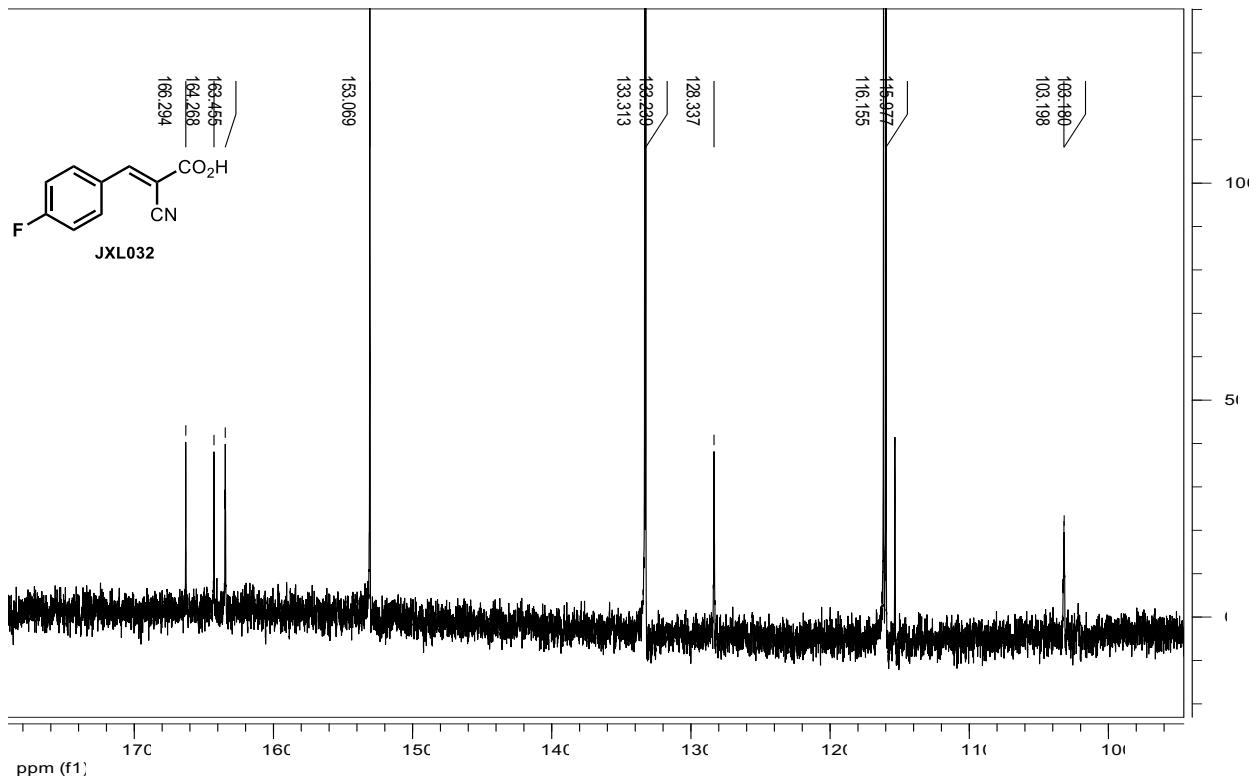

<sup>13</sup>C NMR (126 MHz, DMSO-d<sub>6</sub>)



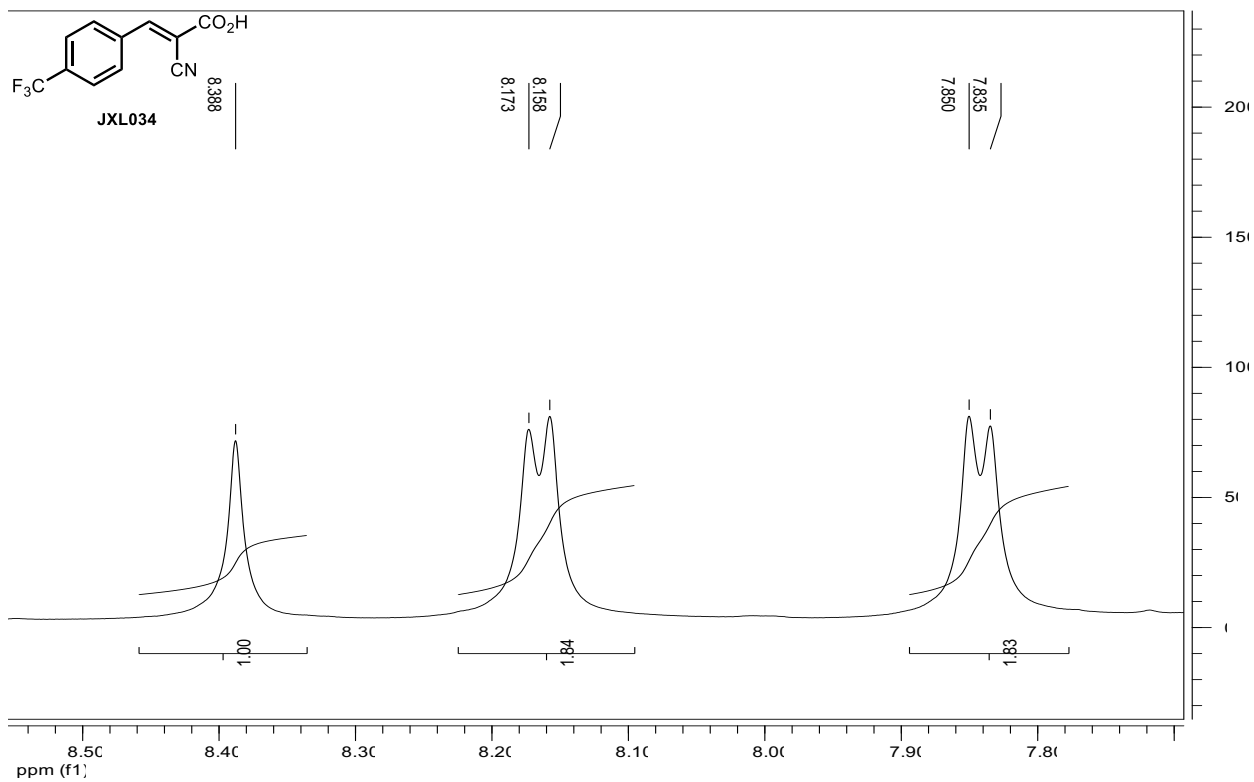

**<sup>1</sup>H NMR (500 MHz, DMSO-d<sub>6</sub>)**

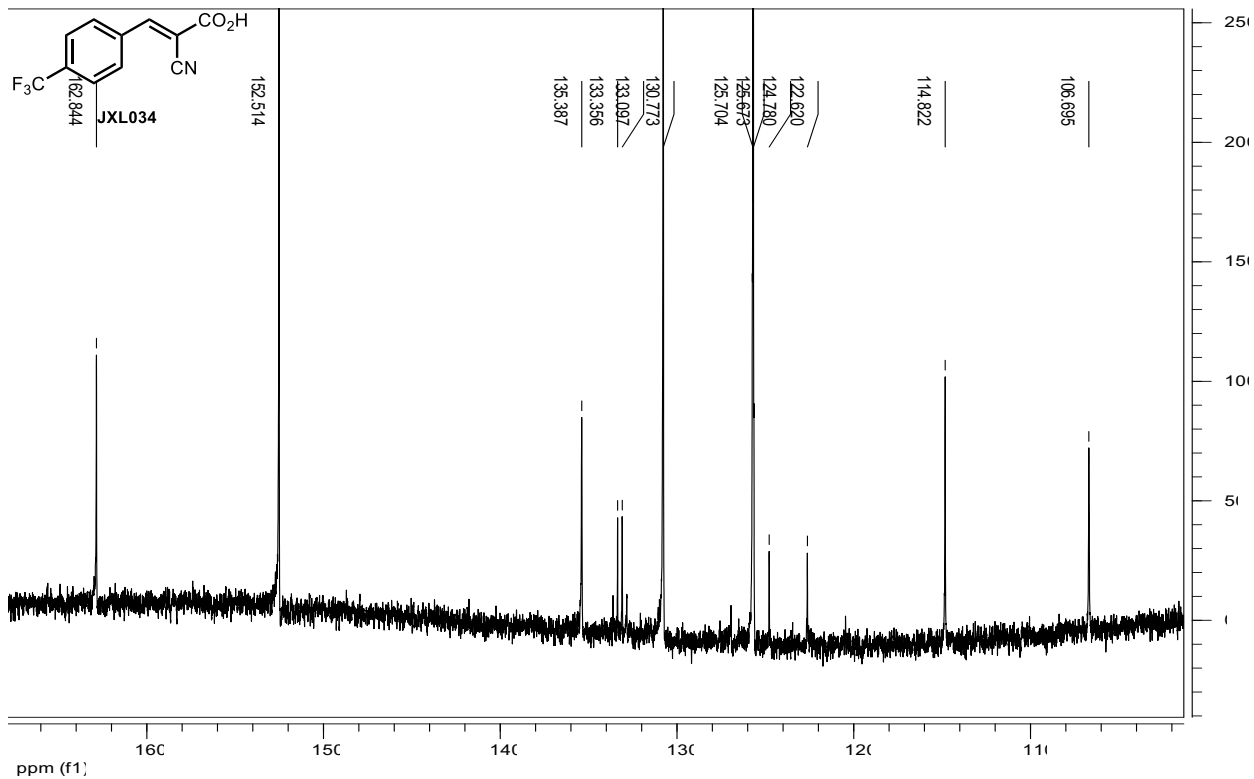

**<sup>13</sup>C NMR (126 MHz, DMSO-d<sub>6</sub>)**

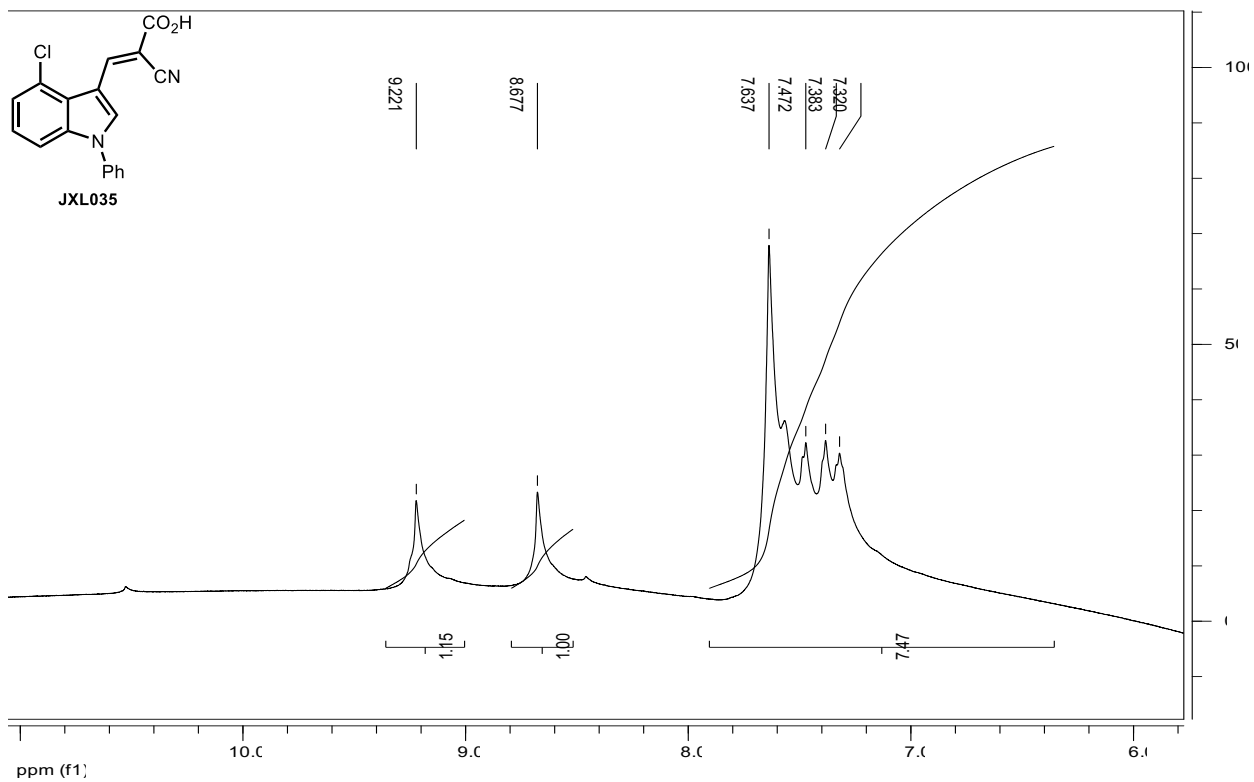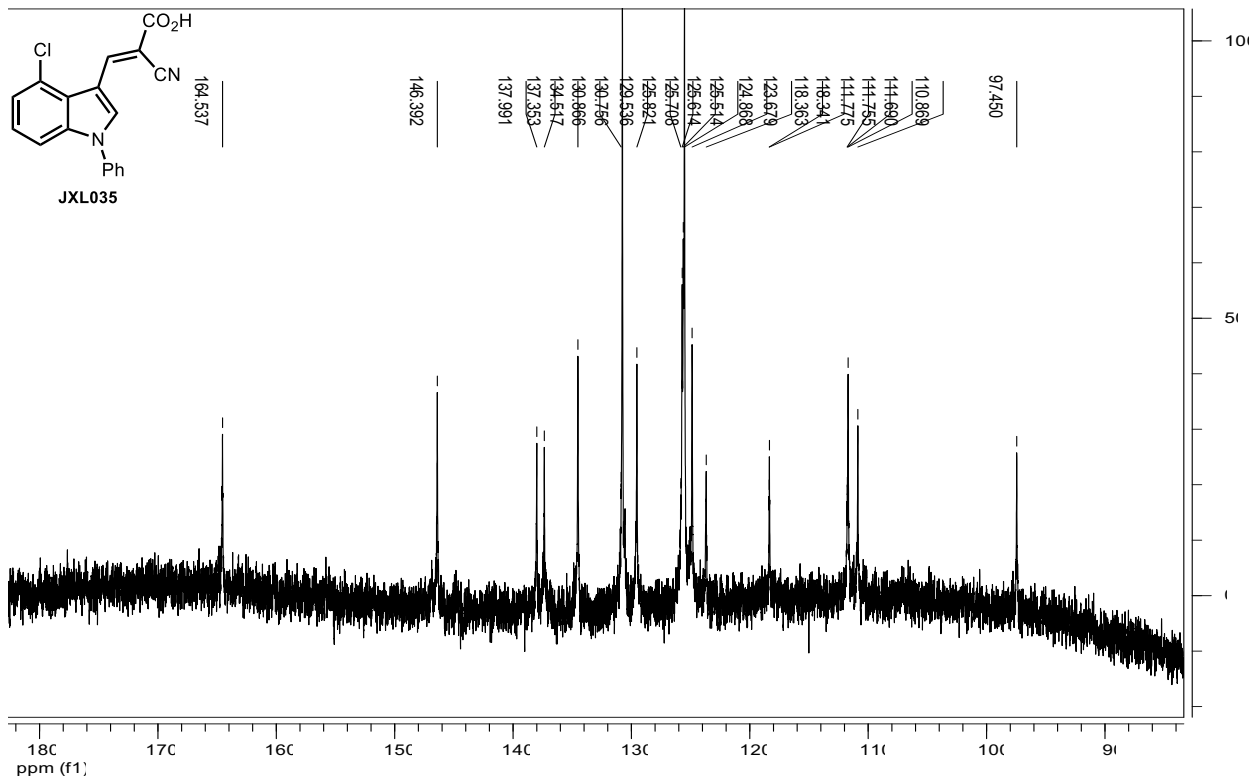

**<sup>13</sup>C NMR (126 MHz, DMSO-d<sub>6</sub>)**

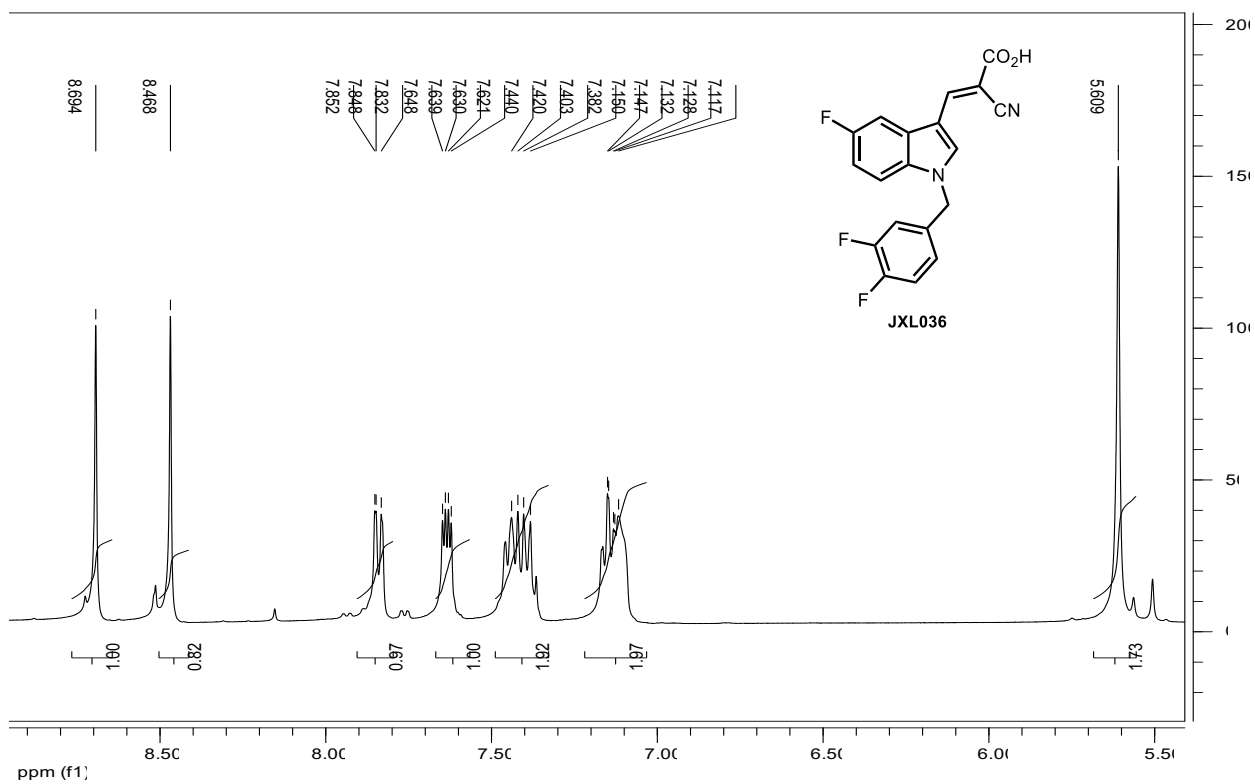

<sup>1</sup>H NMR (500 MHz, DMSO-d<sub>6</sub>)

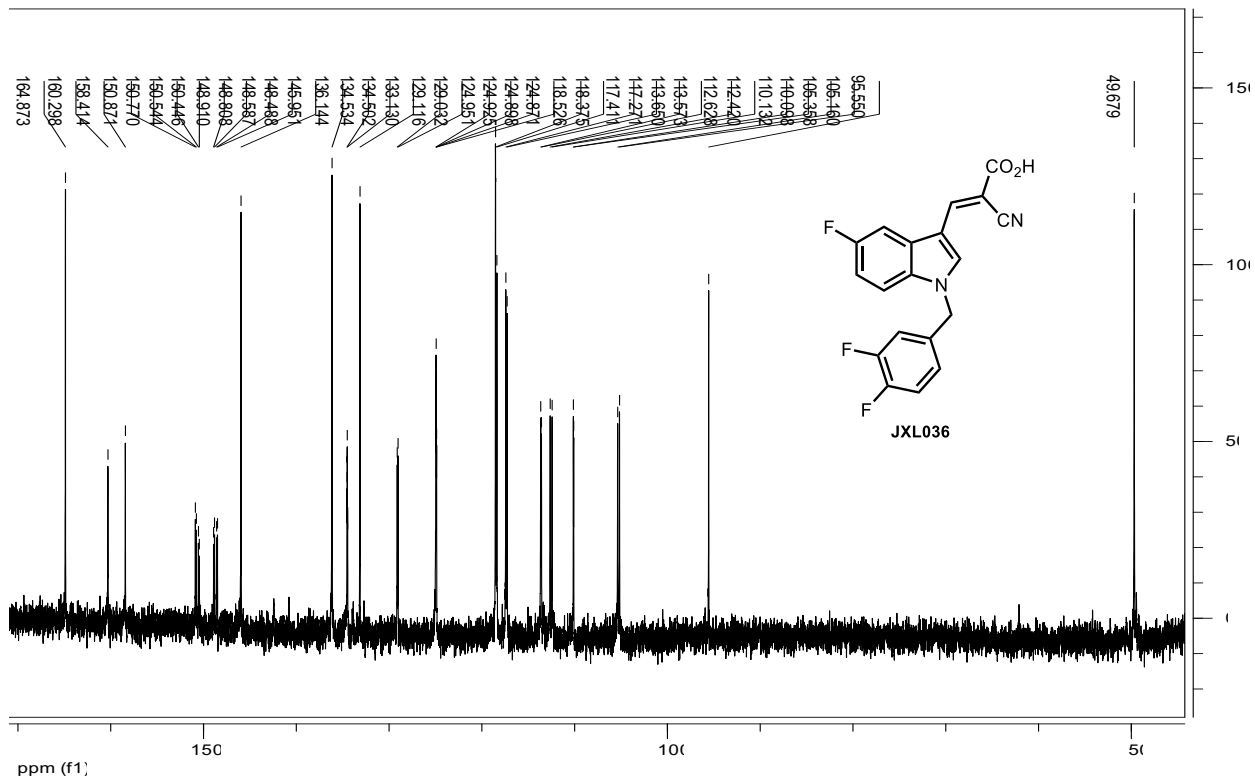

<sup>13</sup>C NMR (126 MHz, DMSO-d<sub>6</sub>)

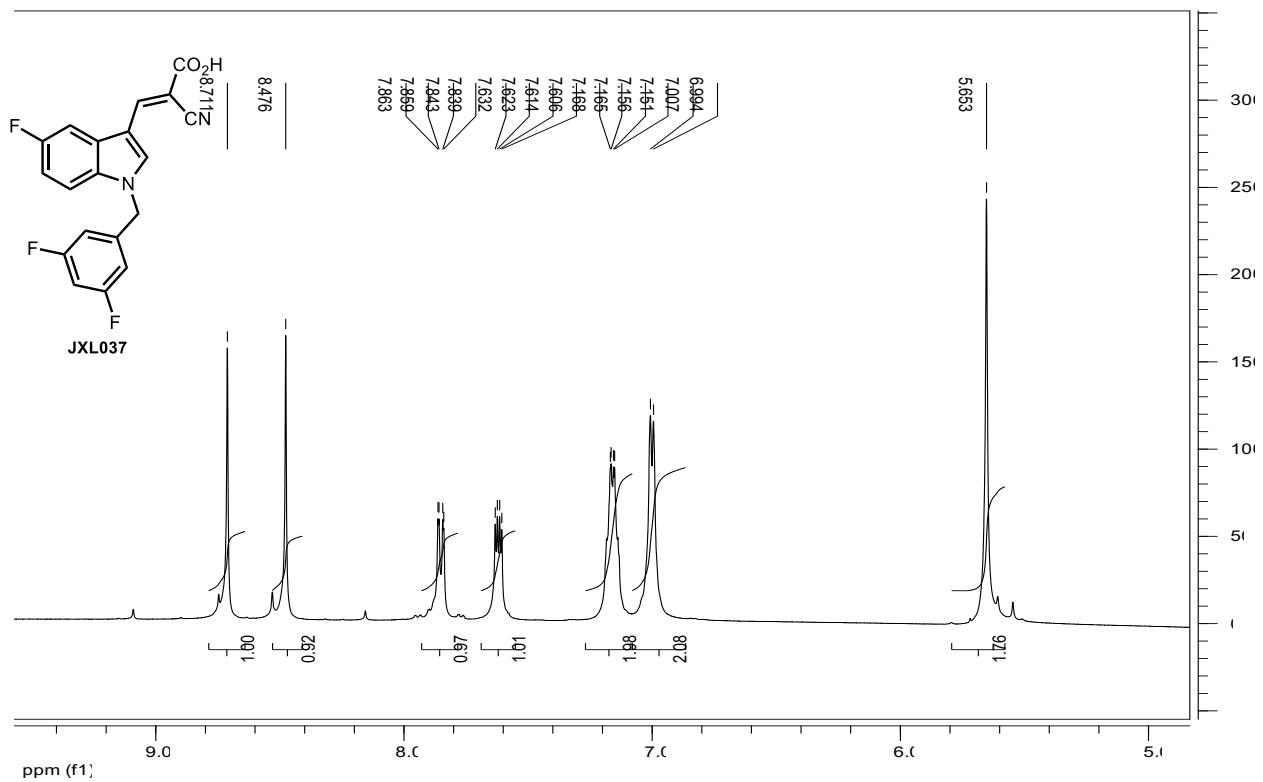

<sup>1</sup>H NMR (500 MHz, DMSO-d<sub>6</sub>)

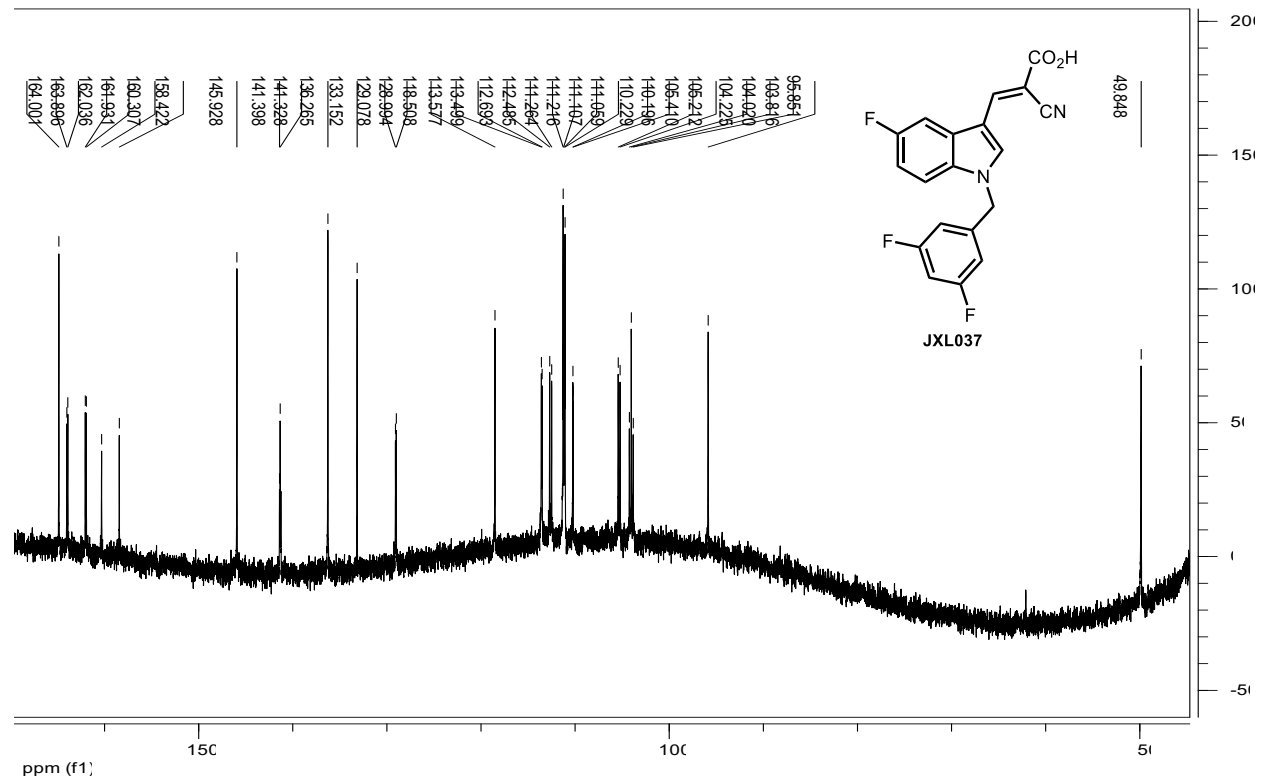

<sup>13</sup>C NMR (126 MHz, DMSO-d<sub>6</sub>)

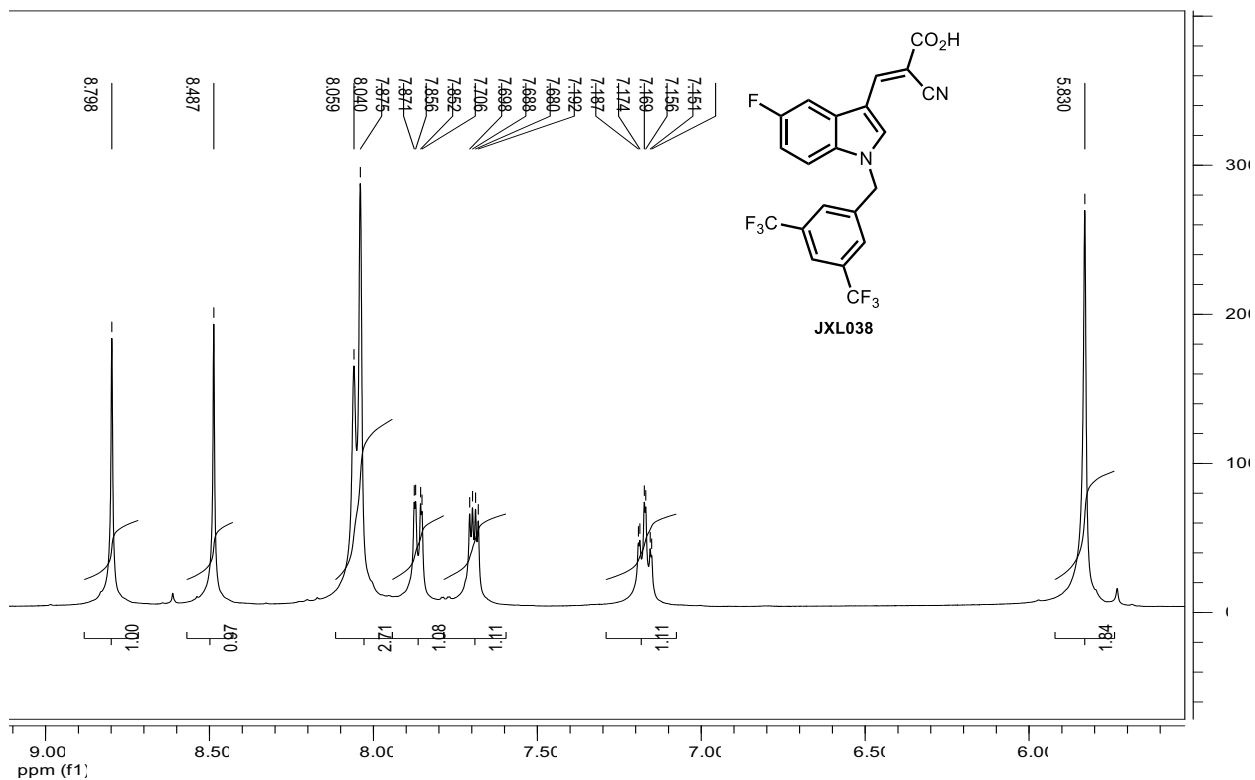

<sup>1</sup>H NMR (500 MHz, DMSO-d<sub>6</sub>)

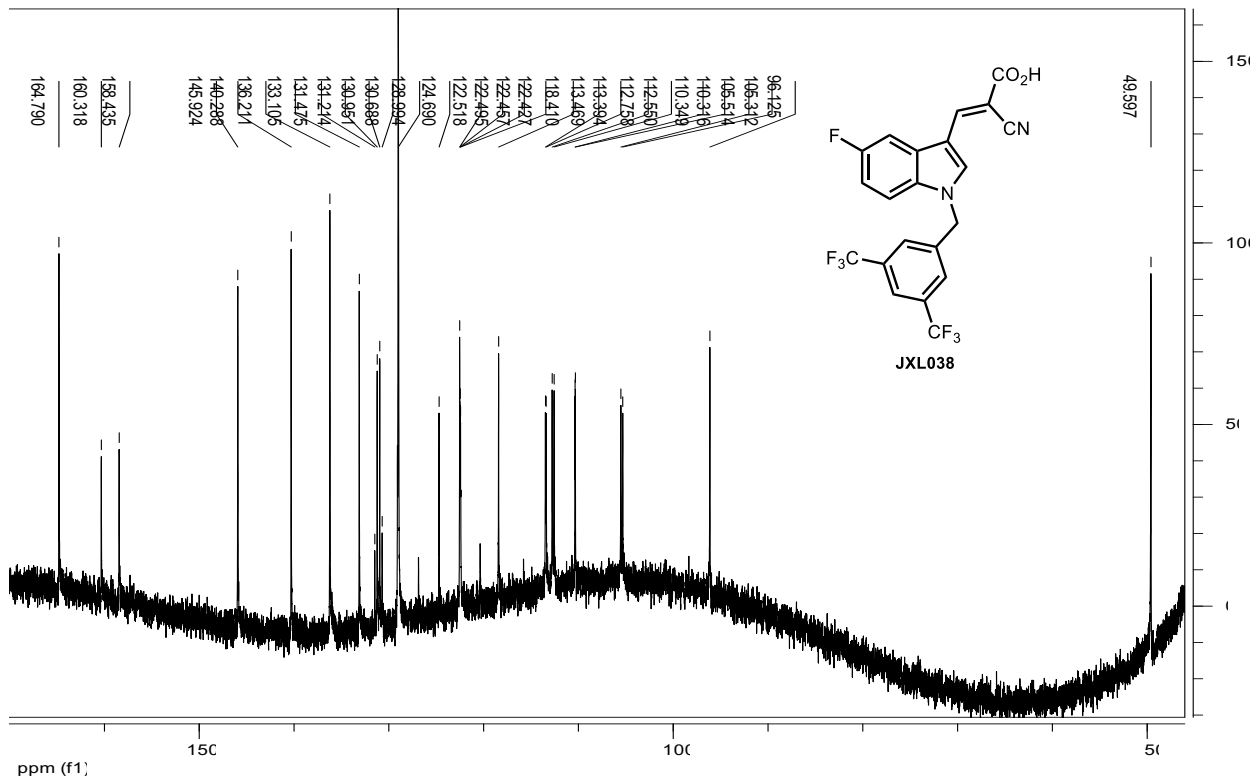

<sup>13</sup>C NMR (126 MHz, DMSO-d<sub>6</sub>)

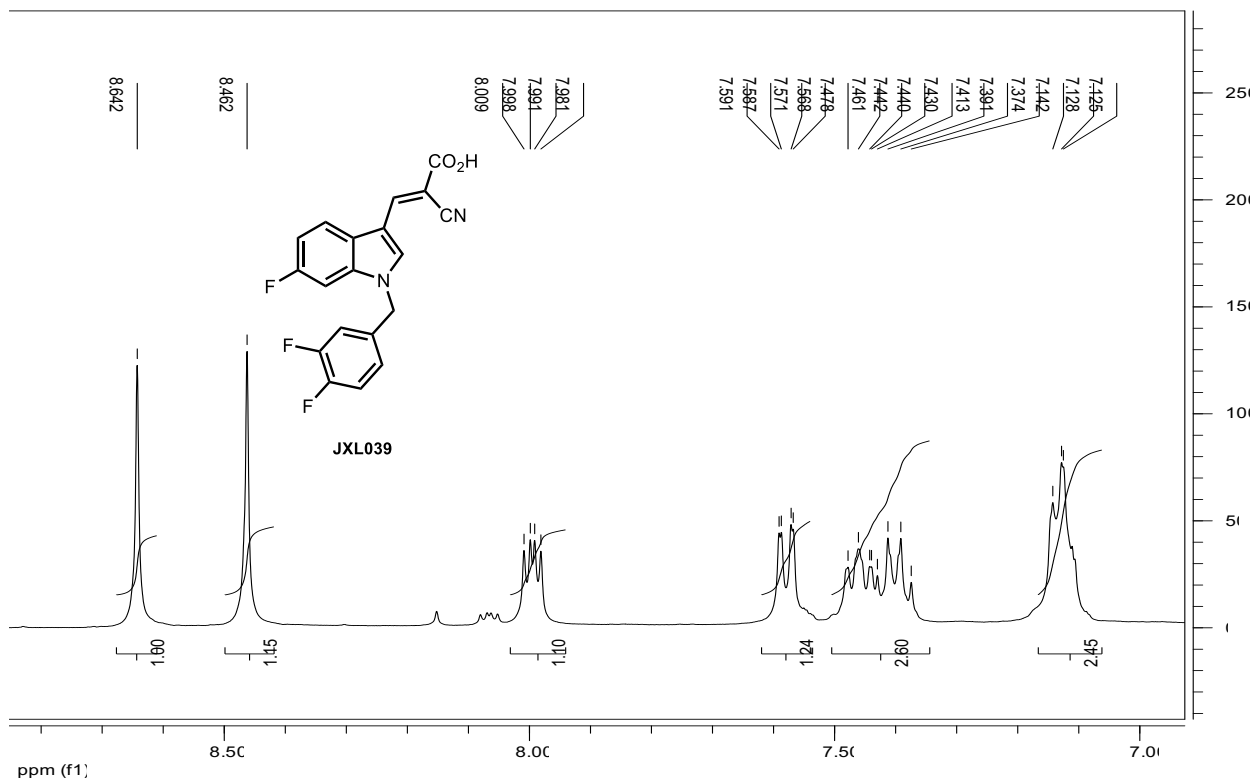

<sup>1</sup>H NMR (500 MHz, DMSO-d<sub>6</sub>)

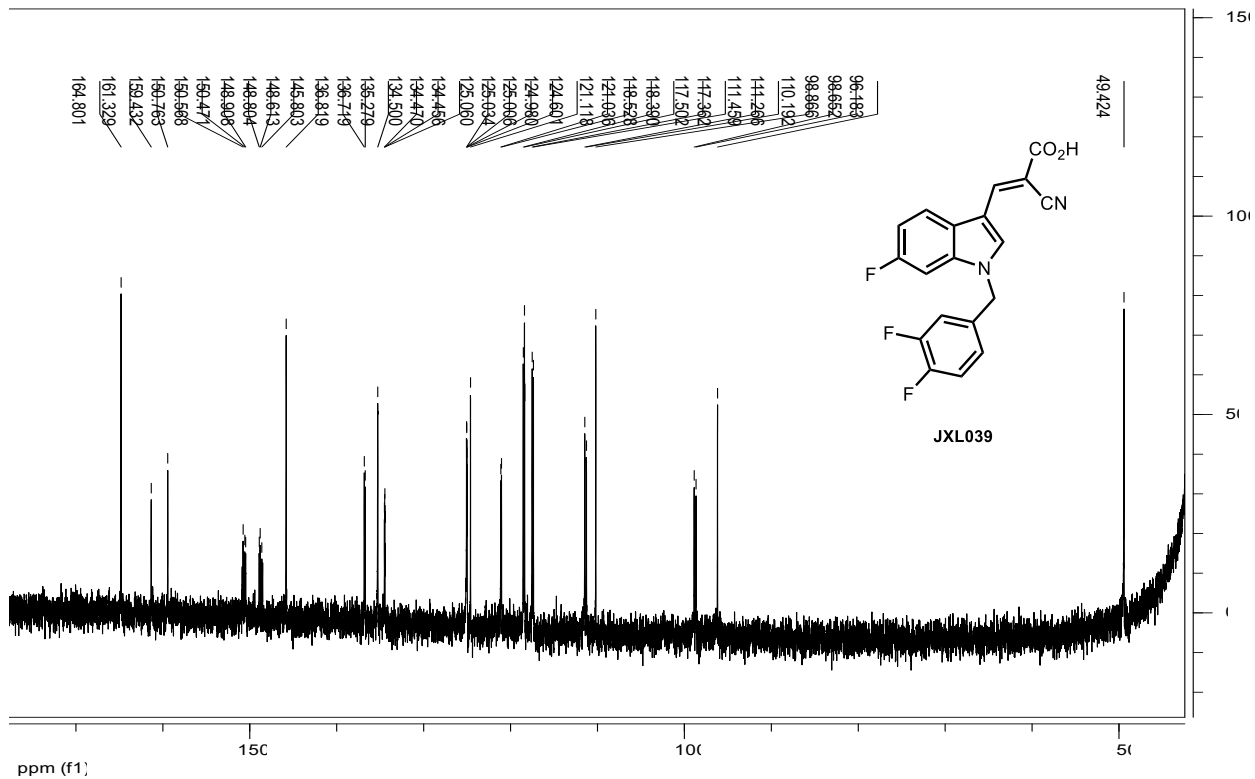

<sup>13</sup>C NMR (126 MHz, DMSO-d<sub>6</sub>)

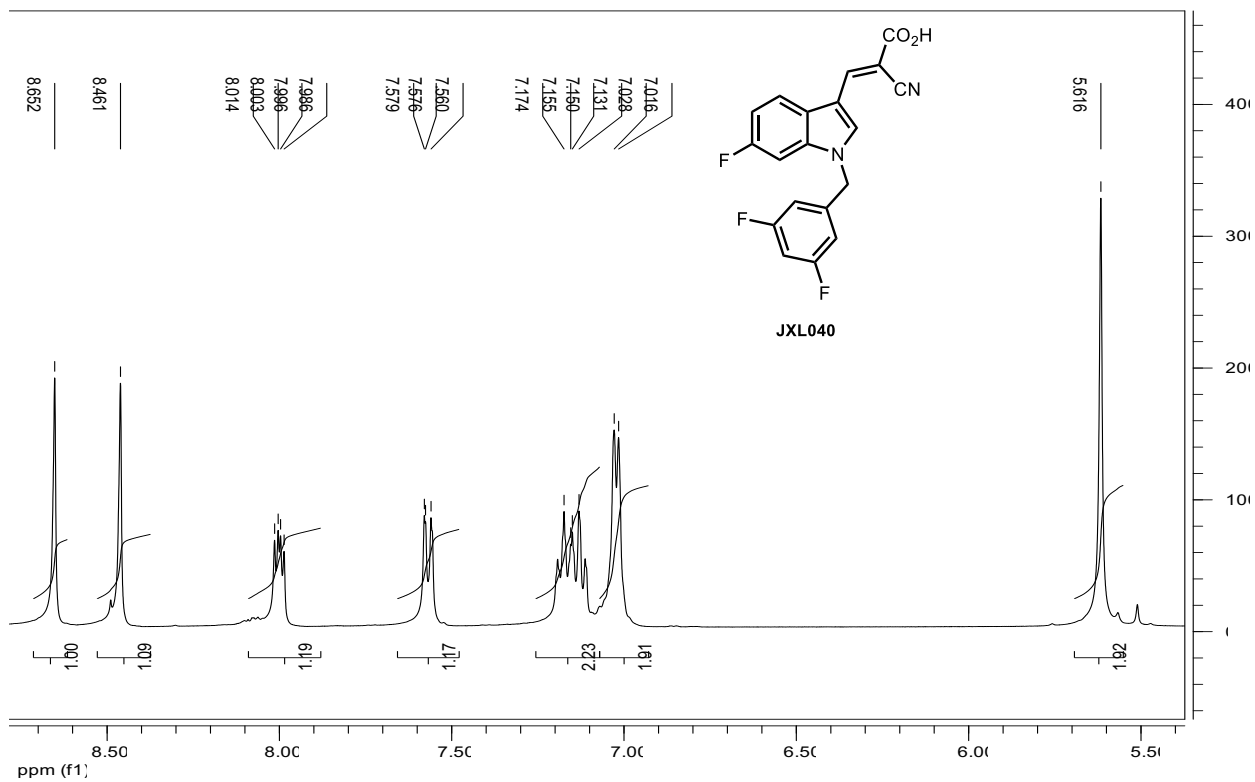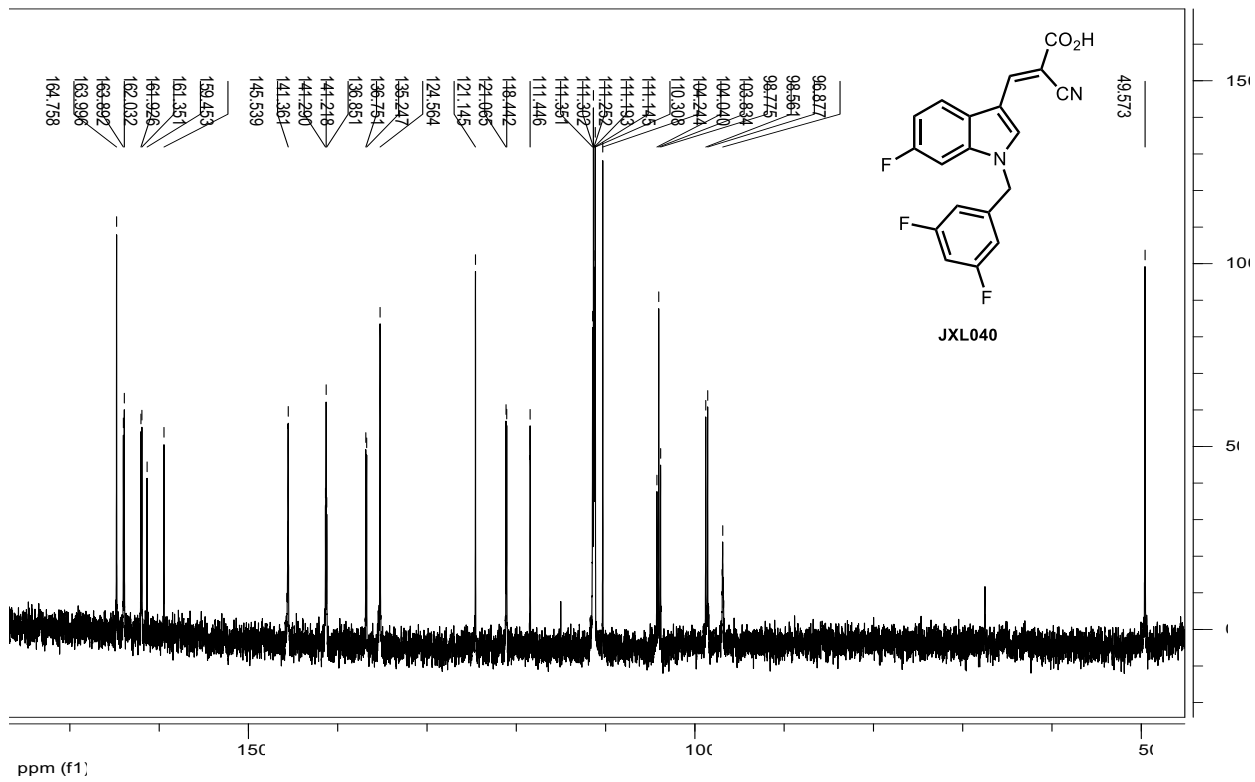

**<sup>13</sup>C NMR (126 MHz, DMSO-d<sub>6</sub>)**

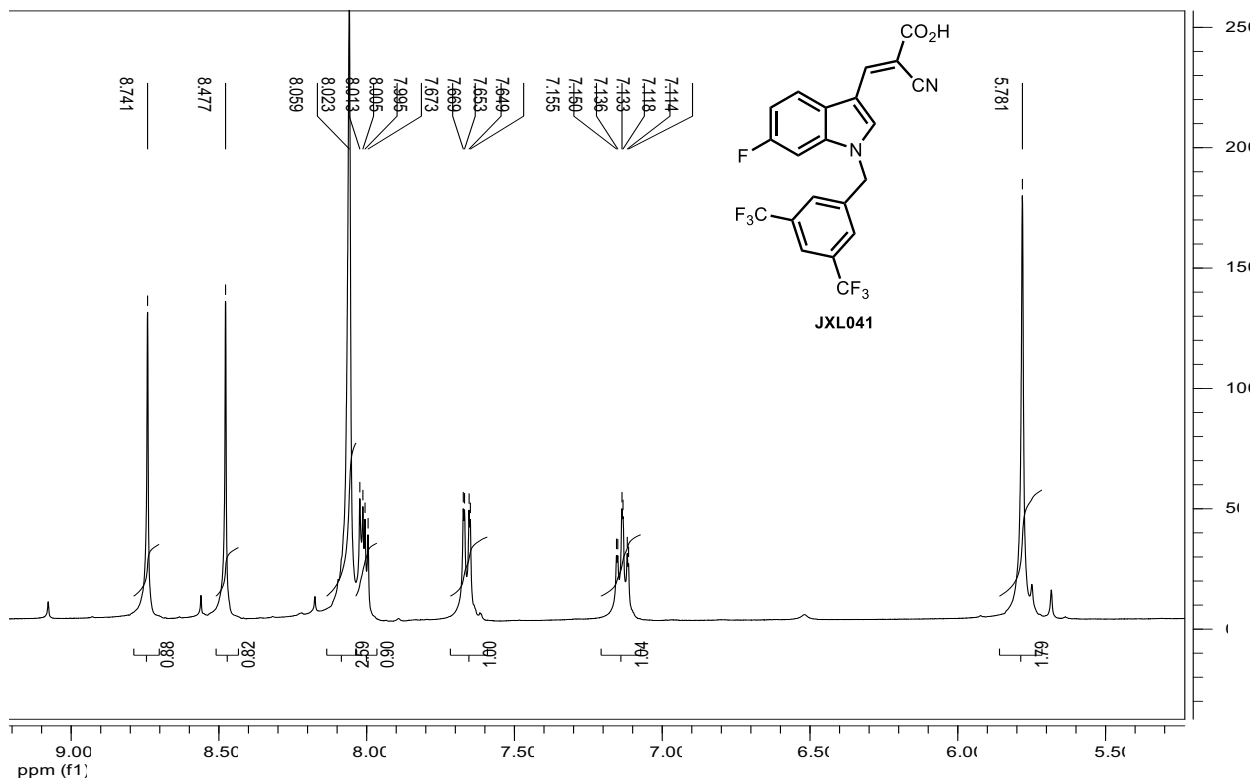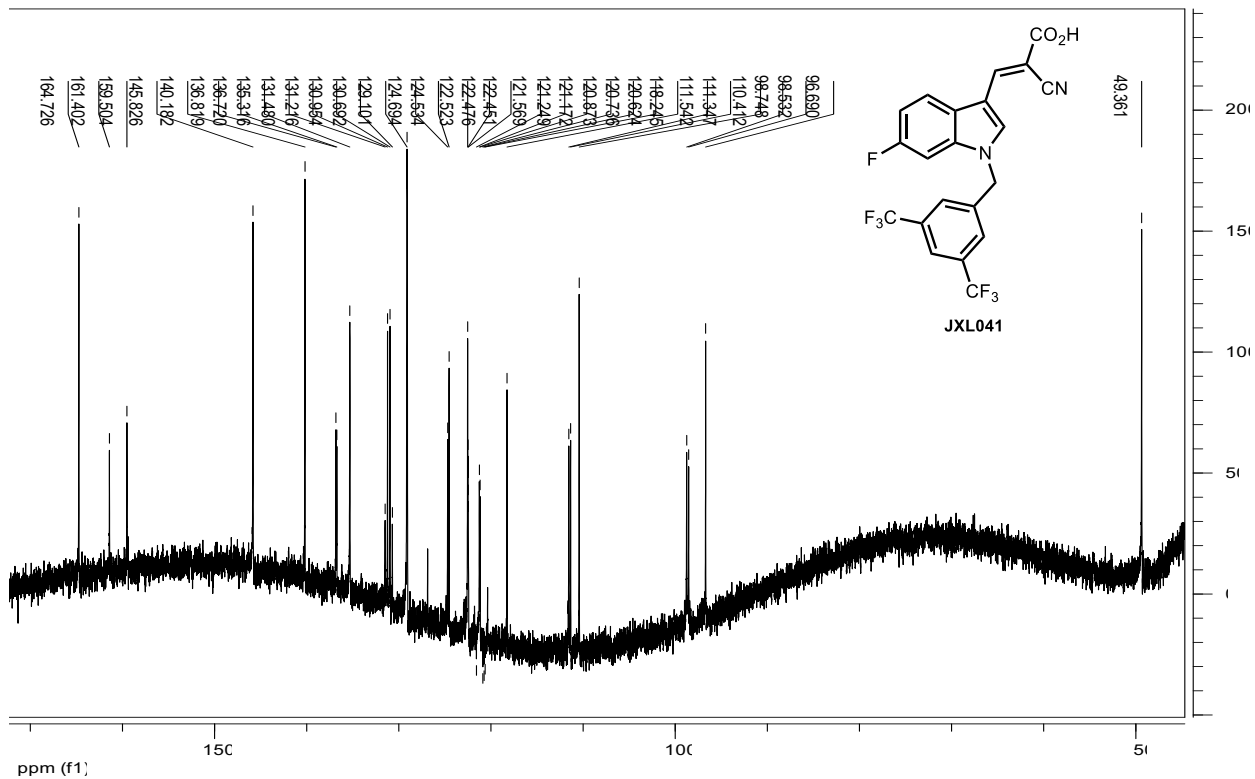

<sup>13</sup>C NMR (126 MHz, DMSO-d<sub>6</sub>)



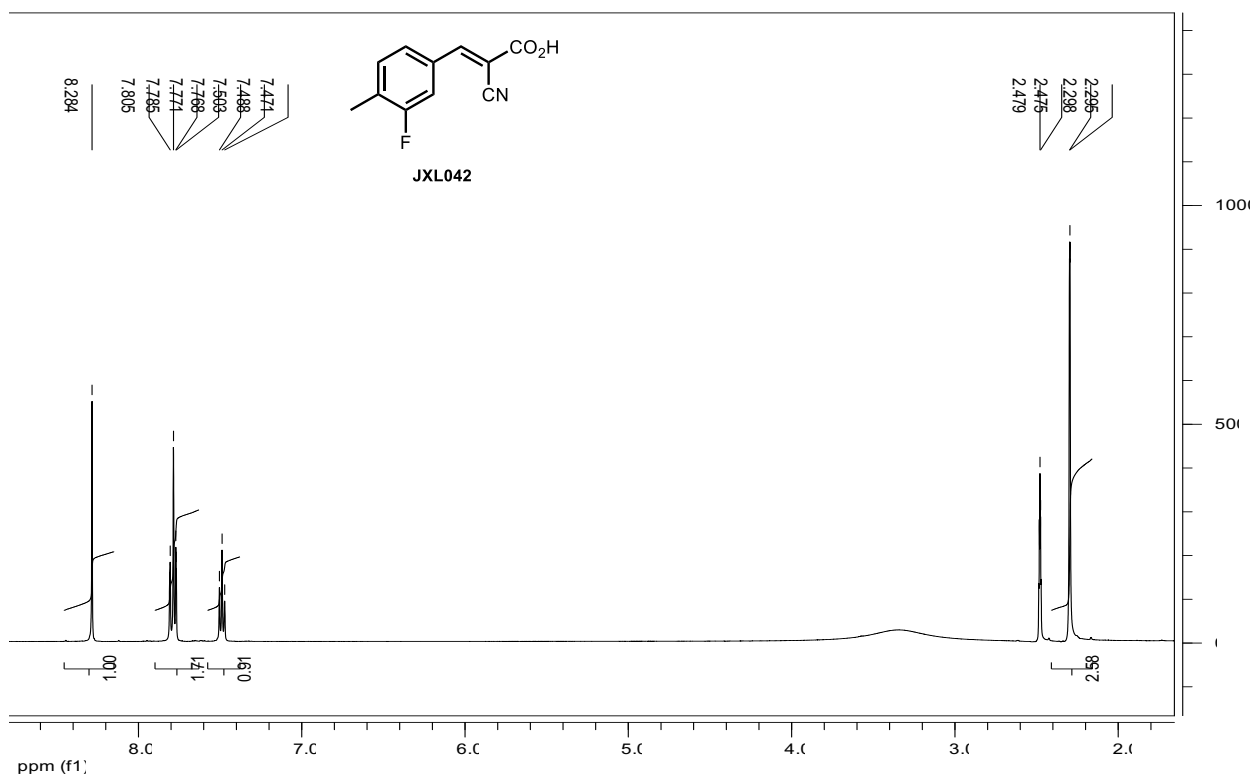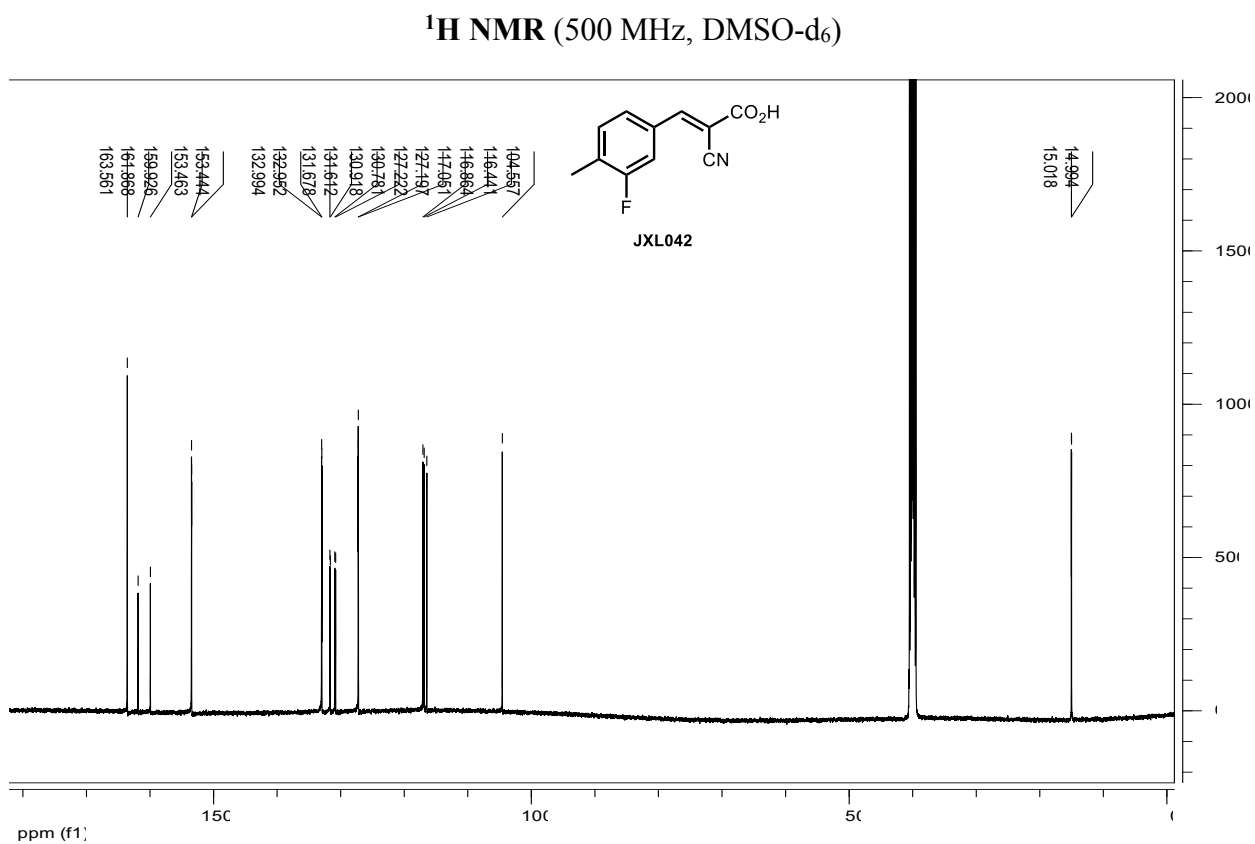

<sup>13</sup>C NMR (126 MHz, DMSO-d<sub>6</sub>)

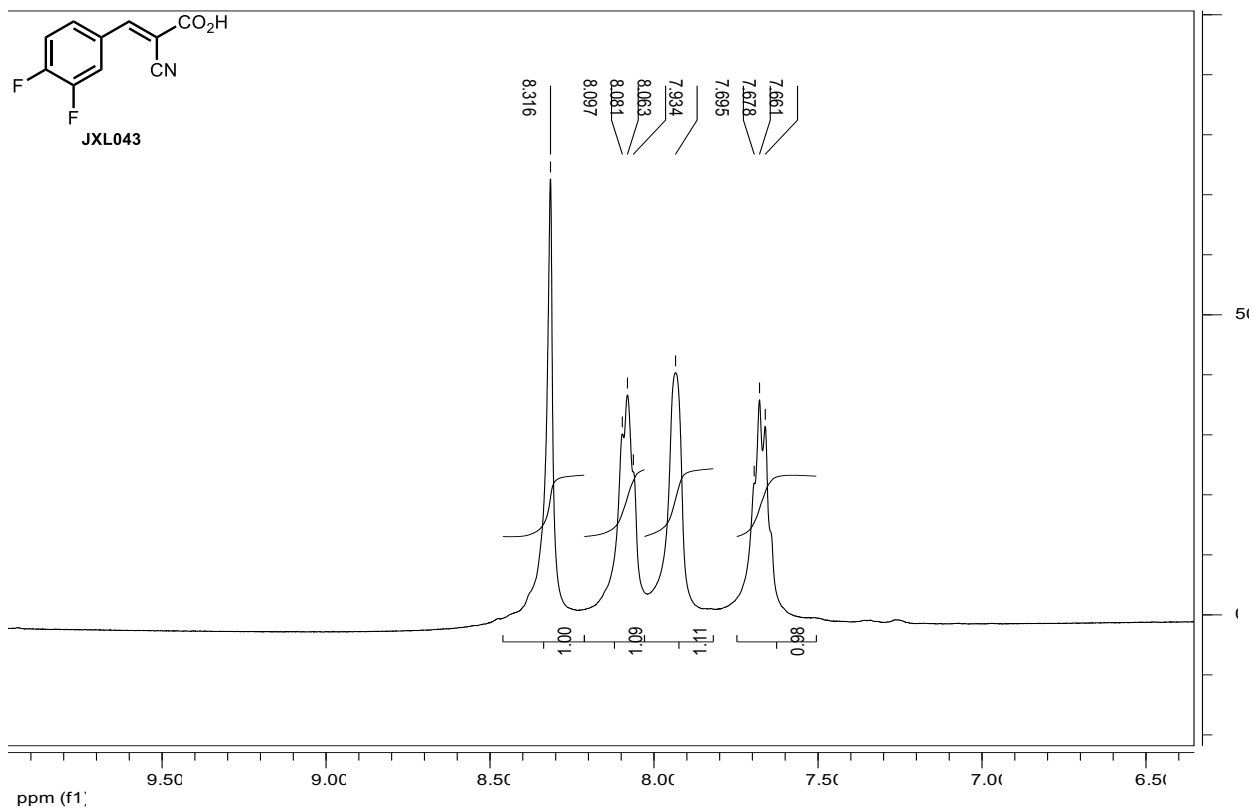

<sup>1</sup>H NMR (500 MHz, DMSO-d<sub>6</sub>)

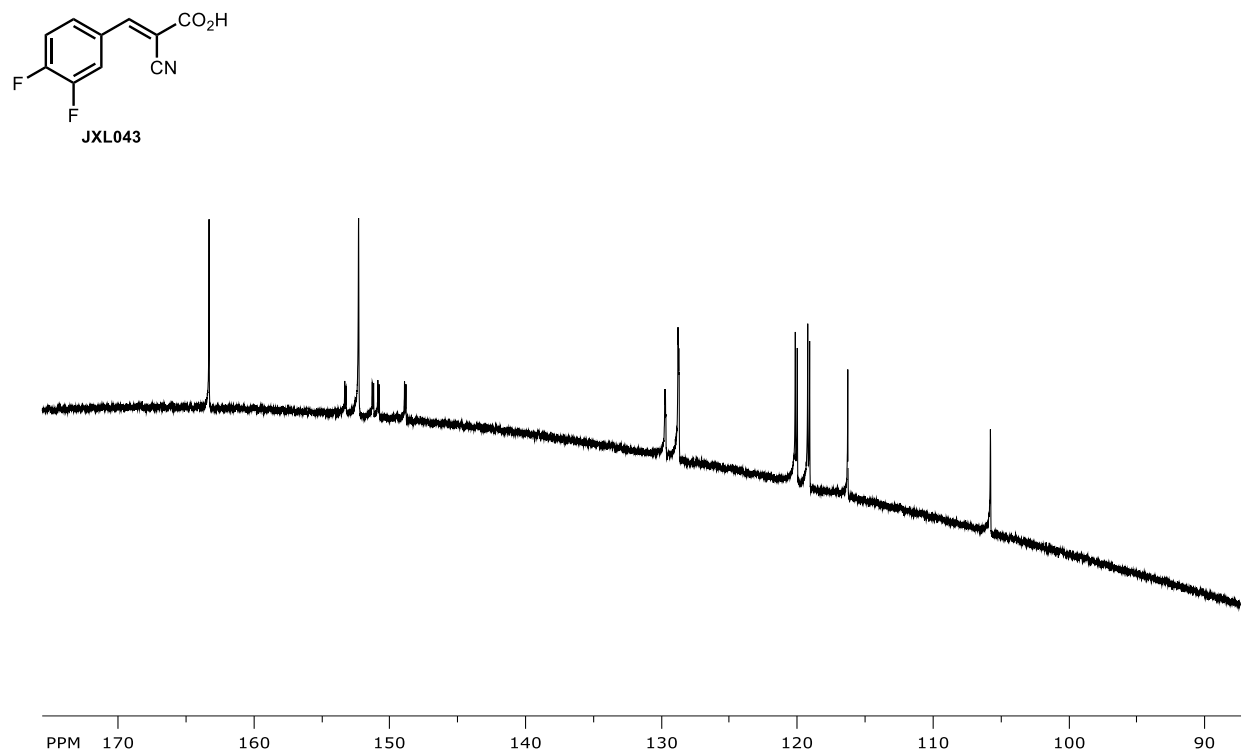

<sup>13</sup>C NMR (126 MHz, DMSO-d<sub>6</sub>)

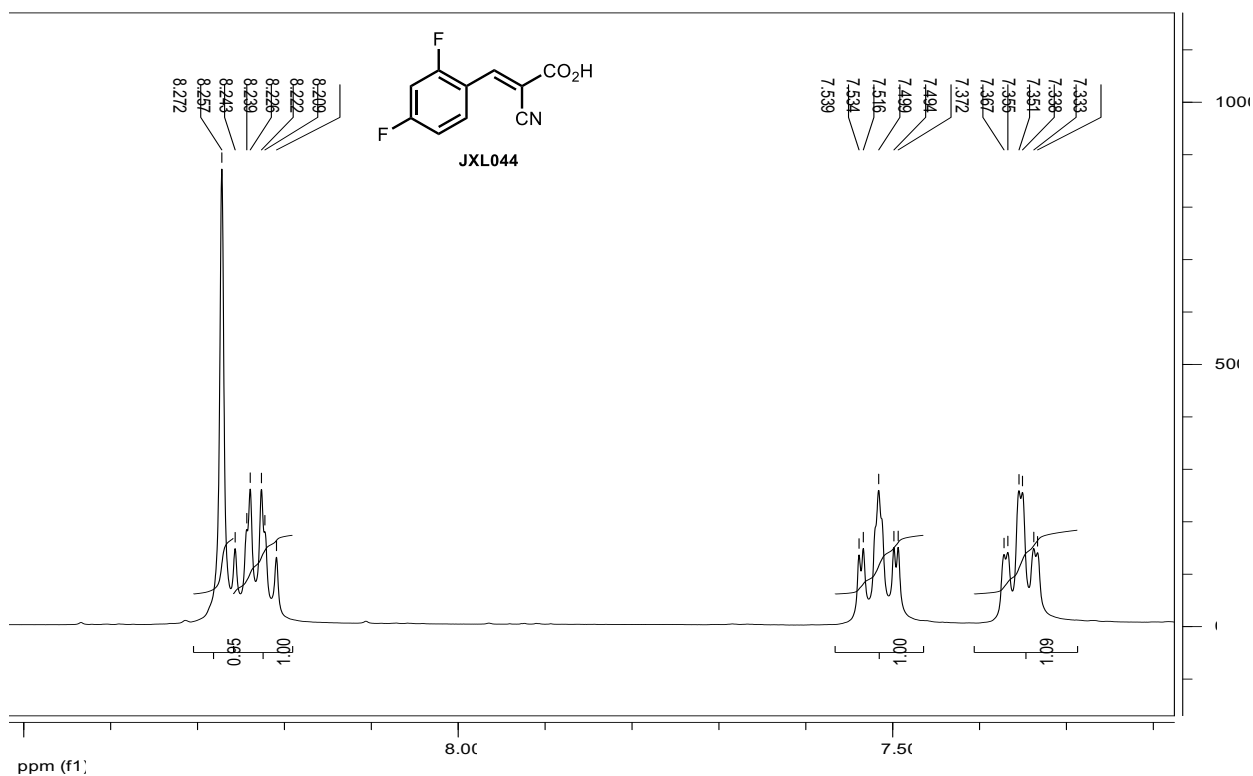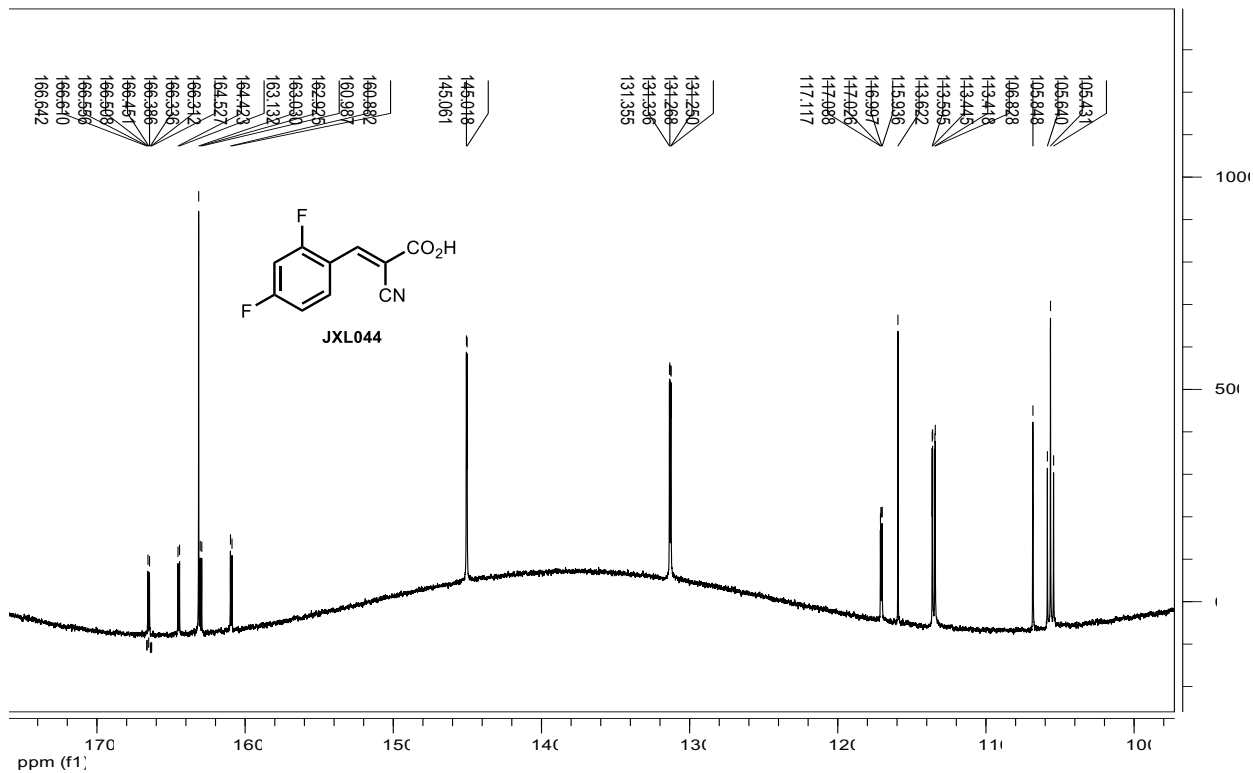

**<sup>13</sup>C NMR (126 MHz, DMSO-d<sub>6</sub>)**

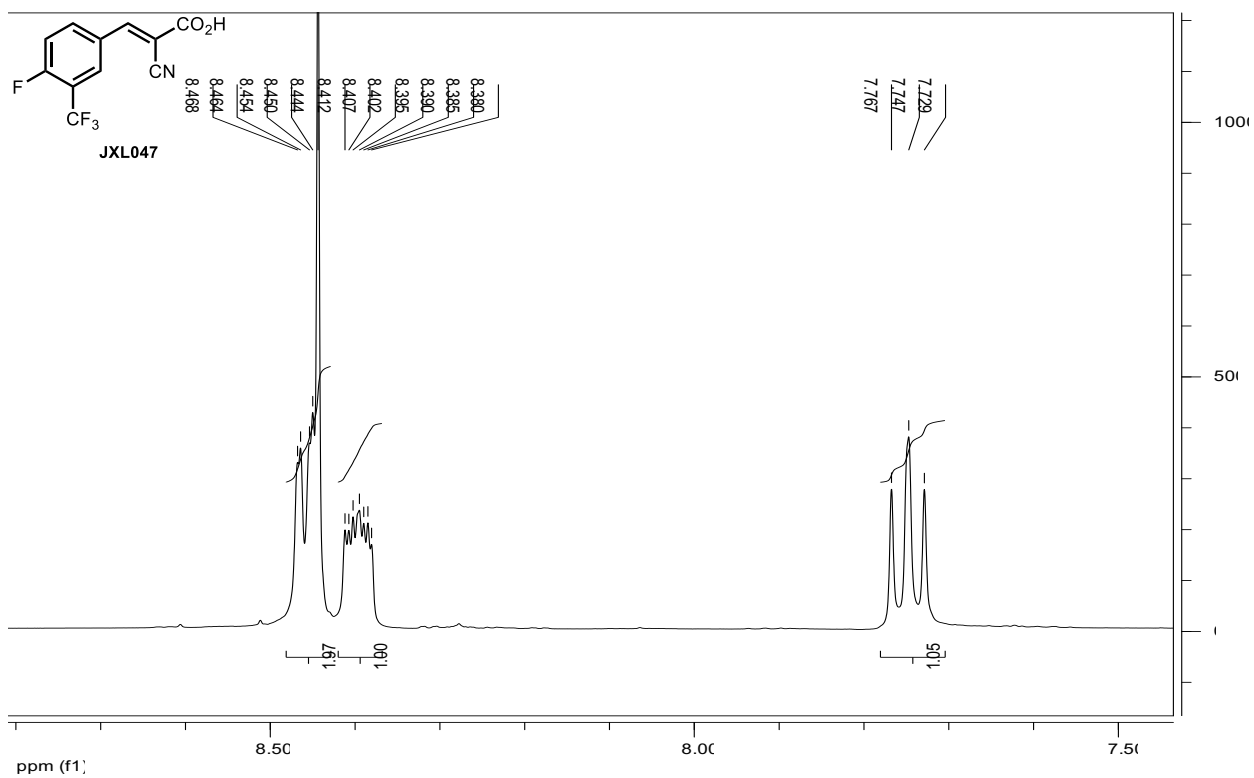

<sup>1</sup>H NMR (500 MHz, DMSO-d<sub>6</sub>)

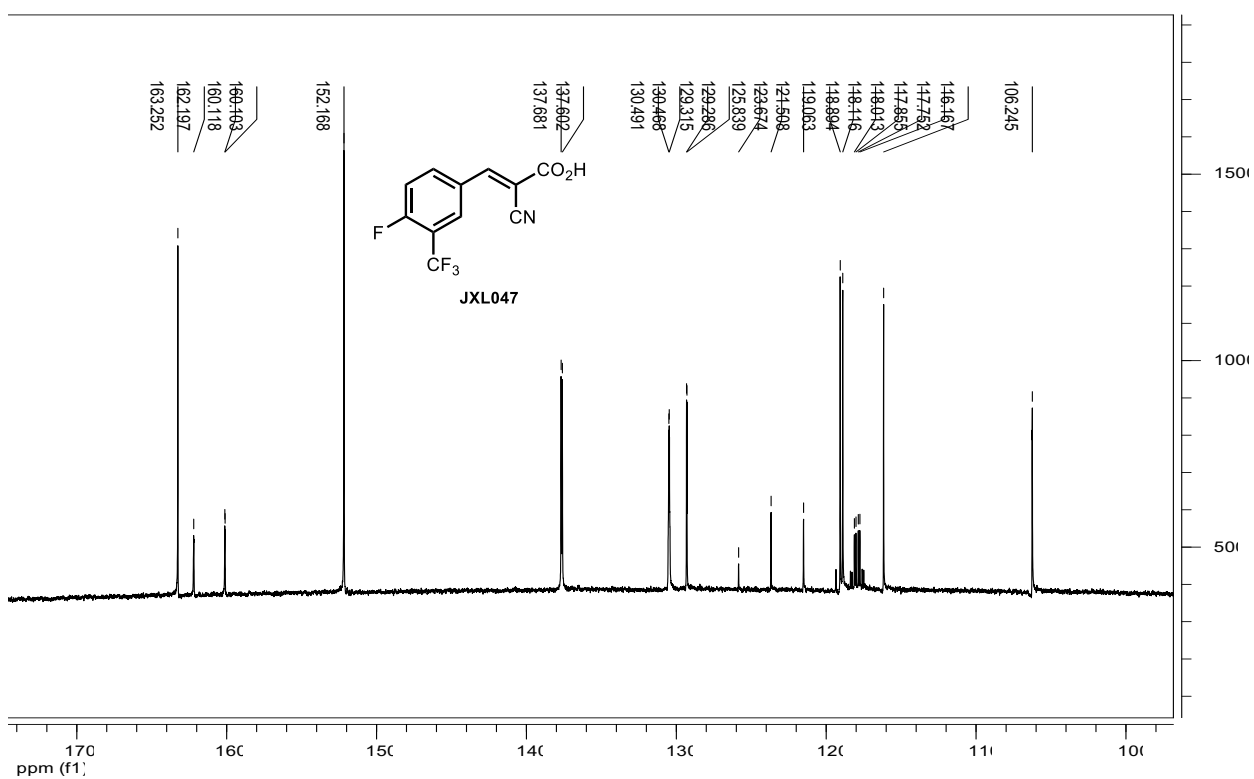

<sup>13</sup>C NMR (126 MHz, DMSO-d<sub>6</sub>)

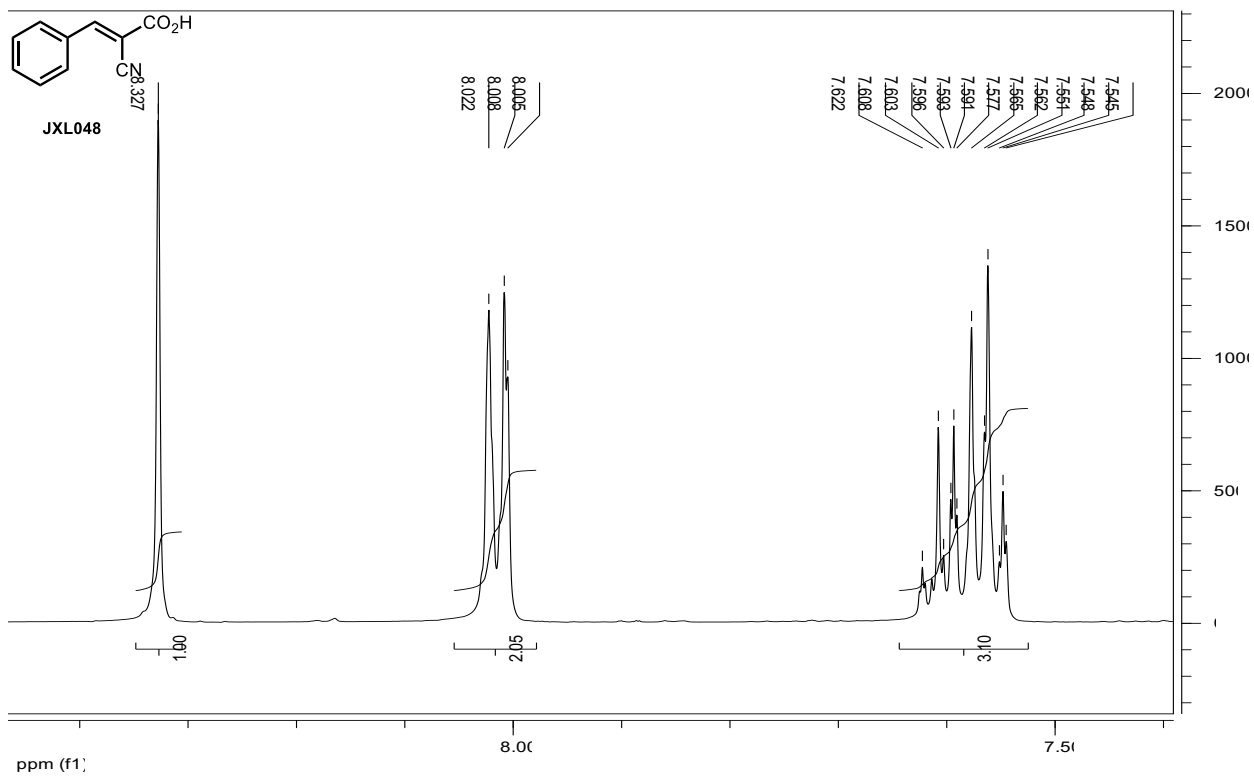

<sup>1</sup>H NMR (500 MHz, DMSO-d<sub>6</sub>)

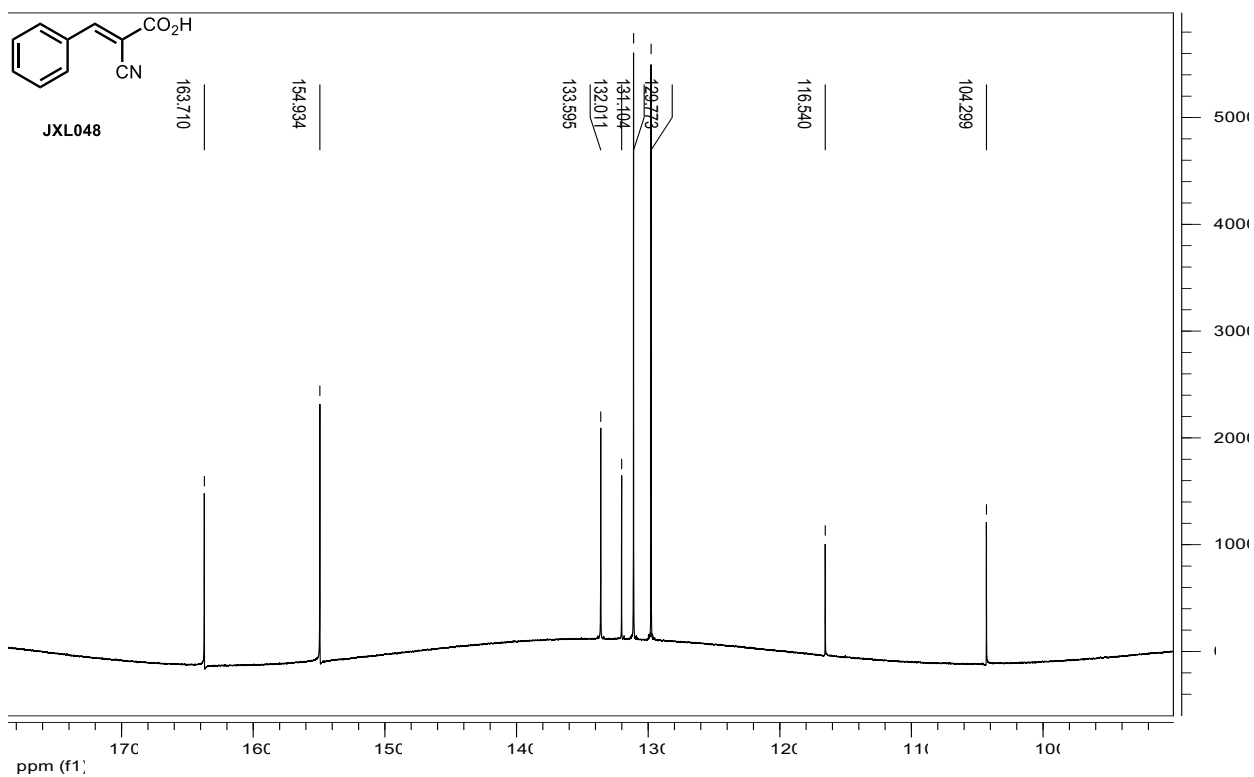

<sup>13</sup>C NMR (126 MHz, DMSO-d<sub>6</sub>)

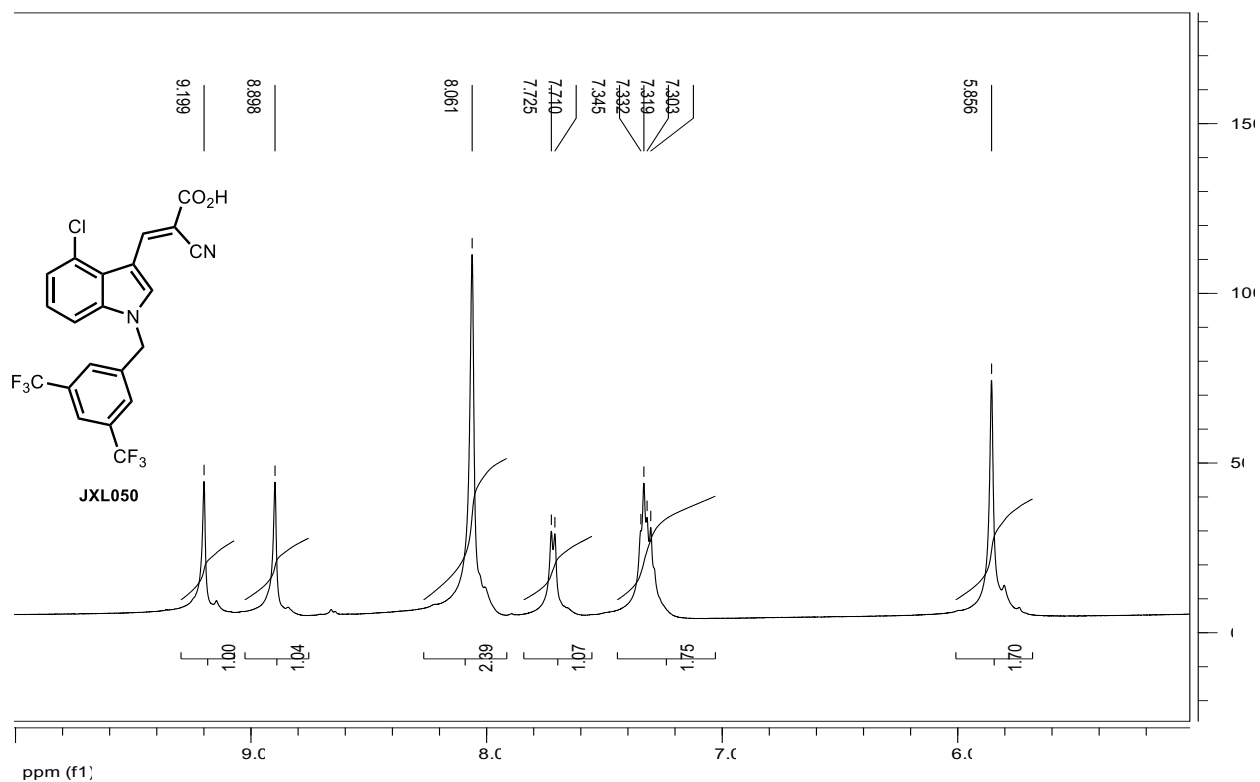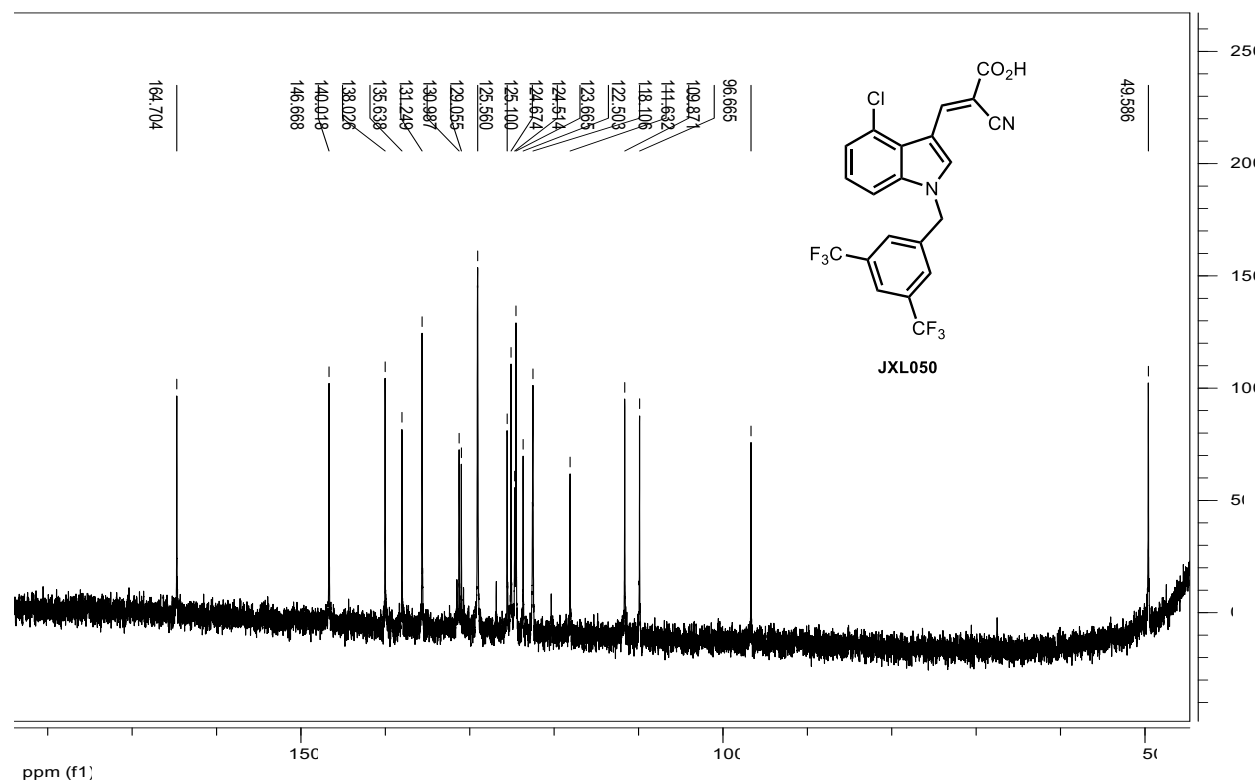

**<sup>13</sup>C NMR (126 MHz, DMSO-d<sub>6</sub>)**

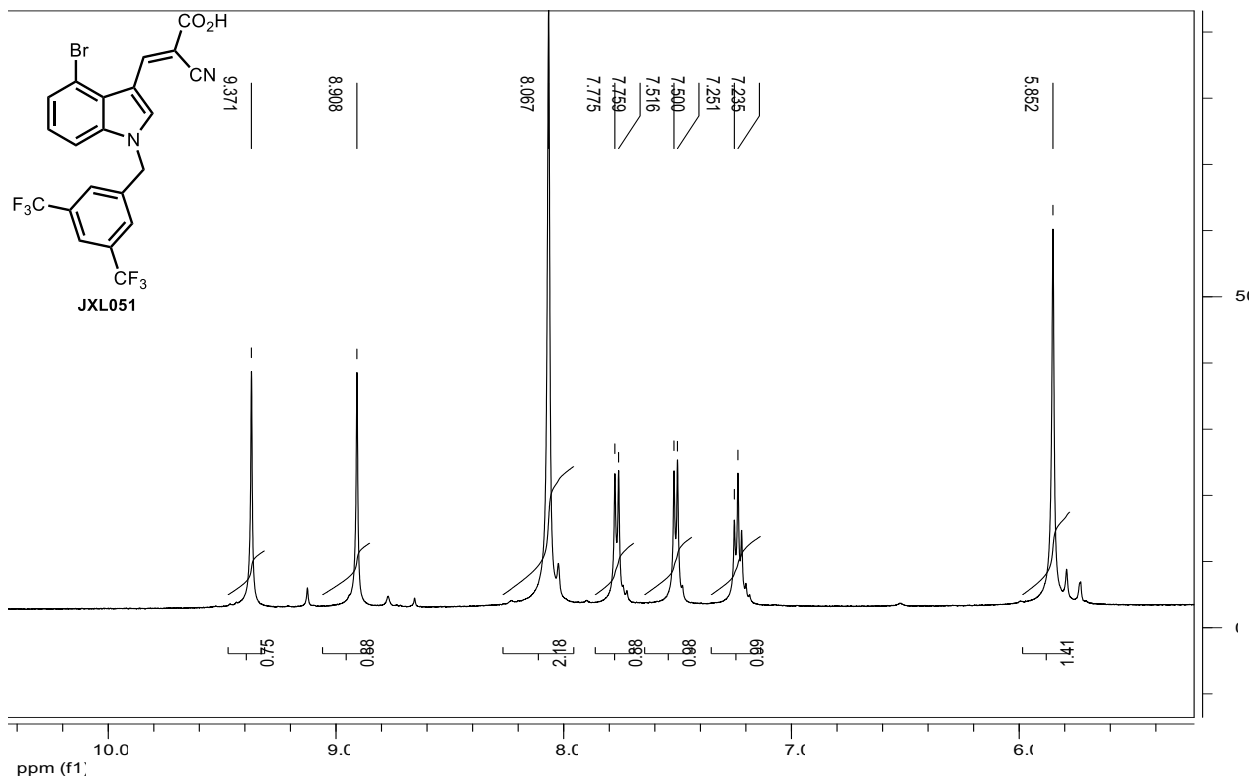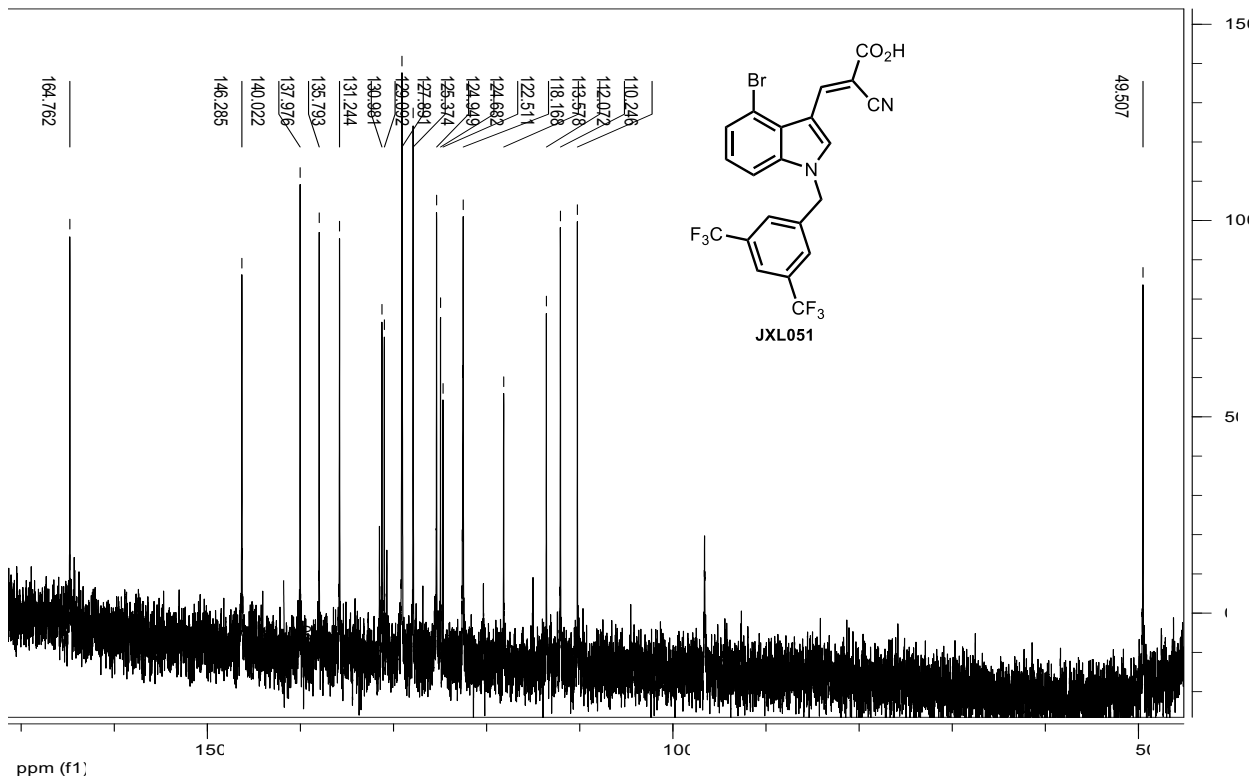

**<sup>13</sup>C NMR (126 MHz, DMSO-d<sub>6</sub>)**

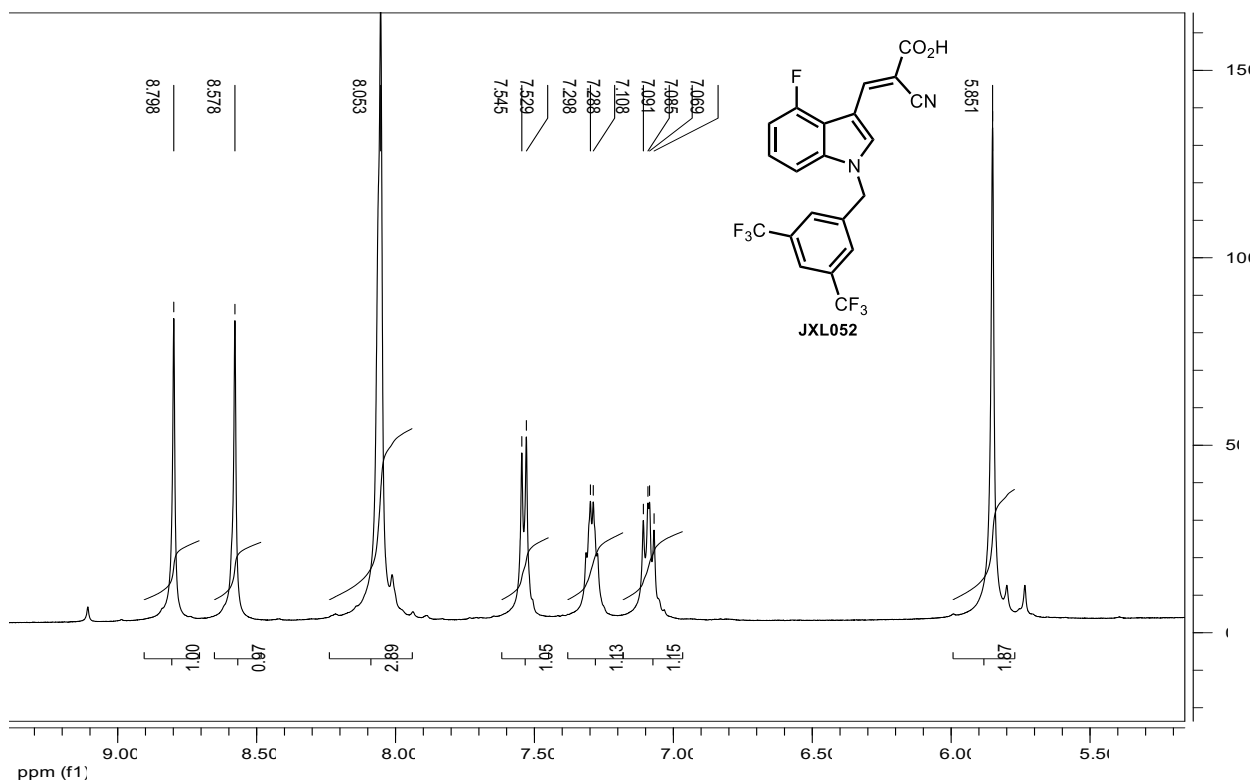

<sup>1</sup>H NMR (500 MHz, DMSO-d<sub>6</sub>)

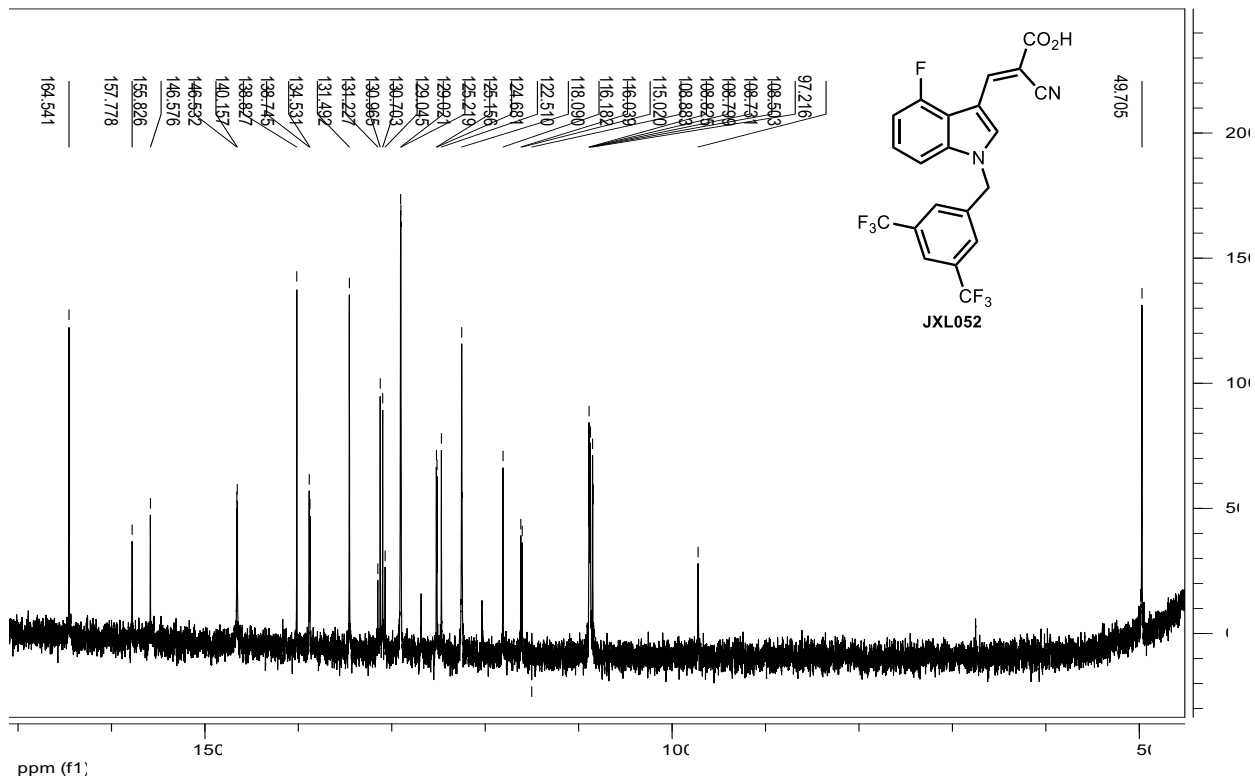

<sup>13</sup>C NMR (126 MHz, DMSO-d<sub>6</sub>)



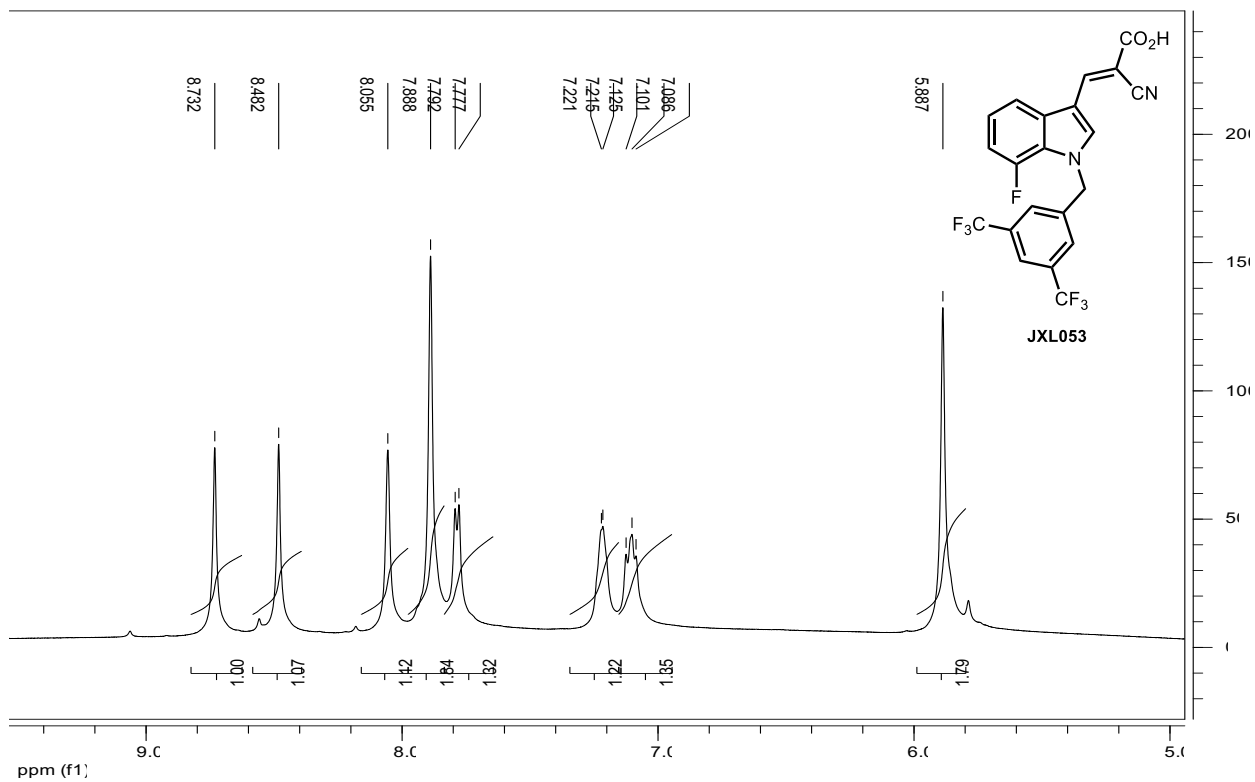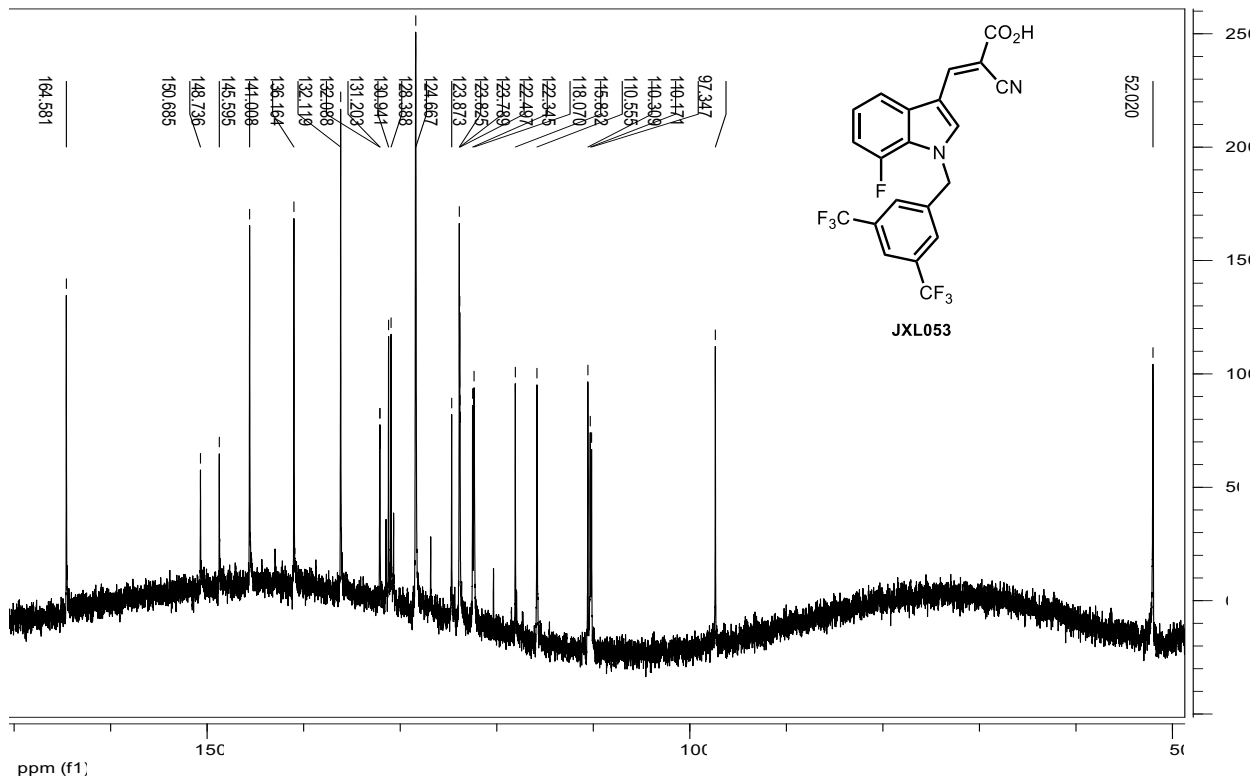

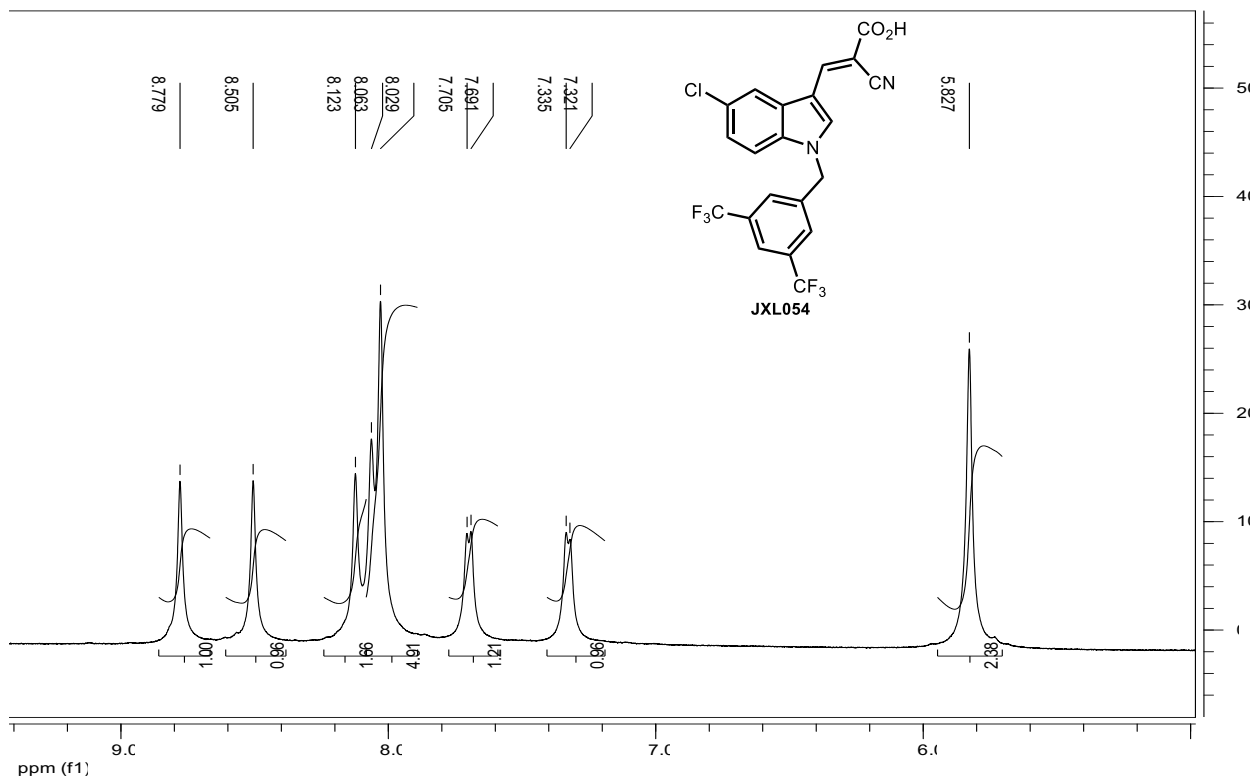

<sup>1</sup>H NMR (500 MHz, DMSO-d<sub>6</sub>)

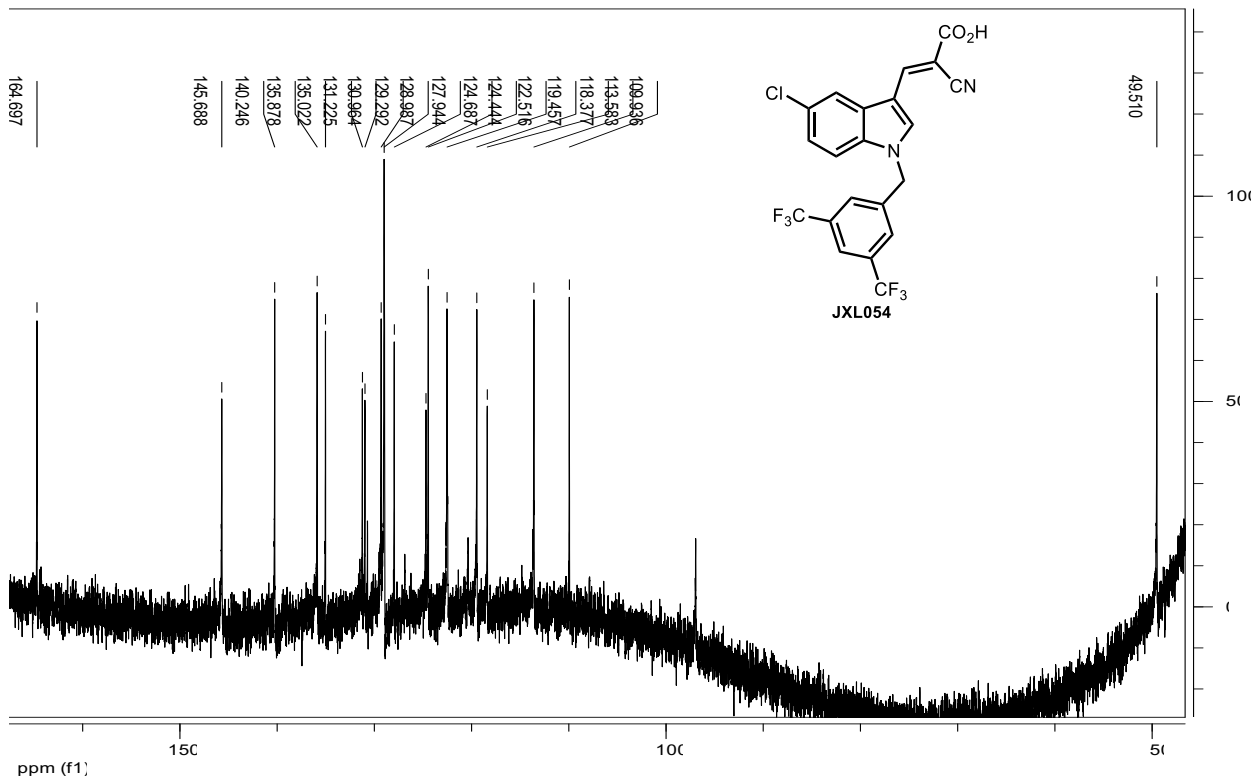

<sup>13</sup>C NMR (126 MHz, DMSO-d<sub>6</sub>)

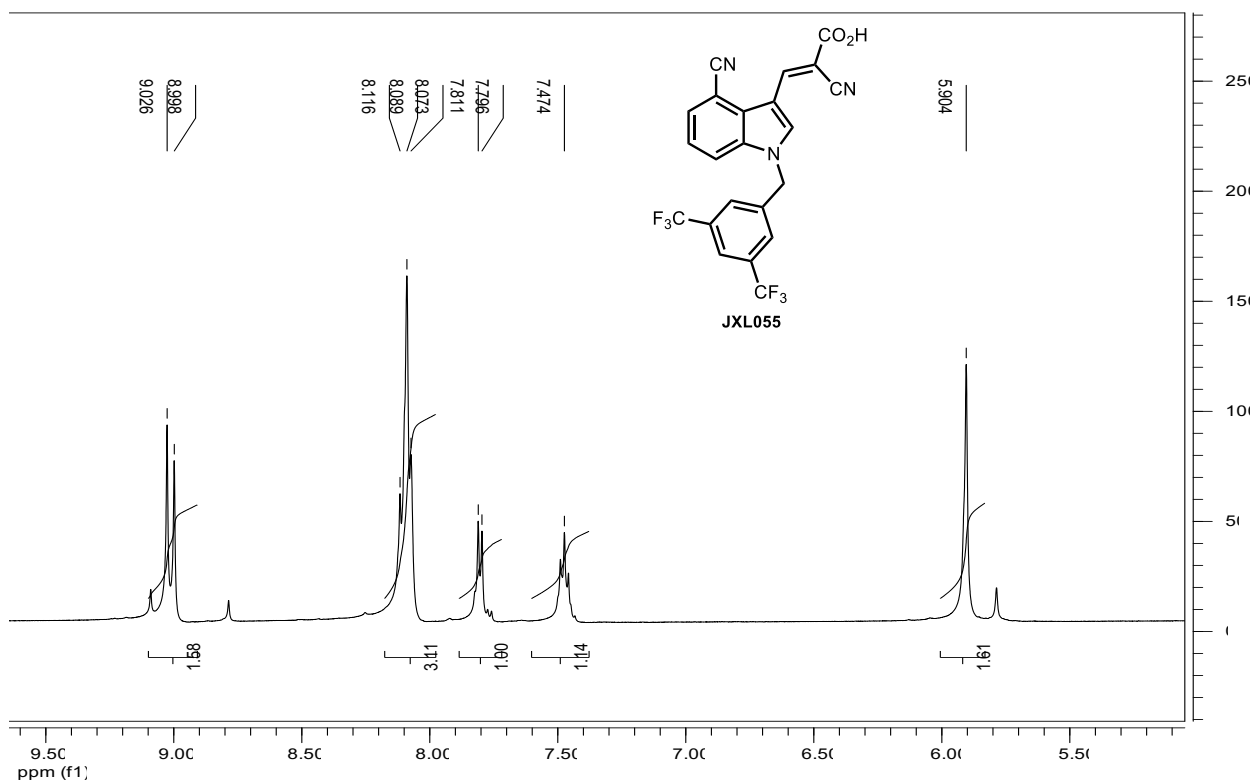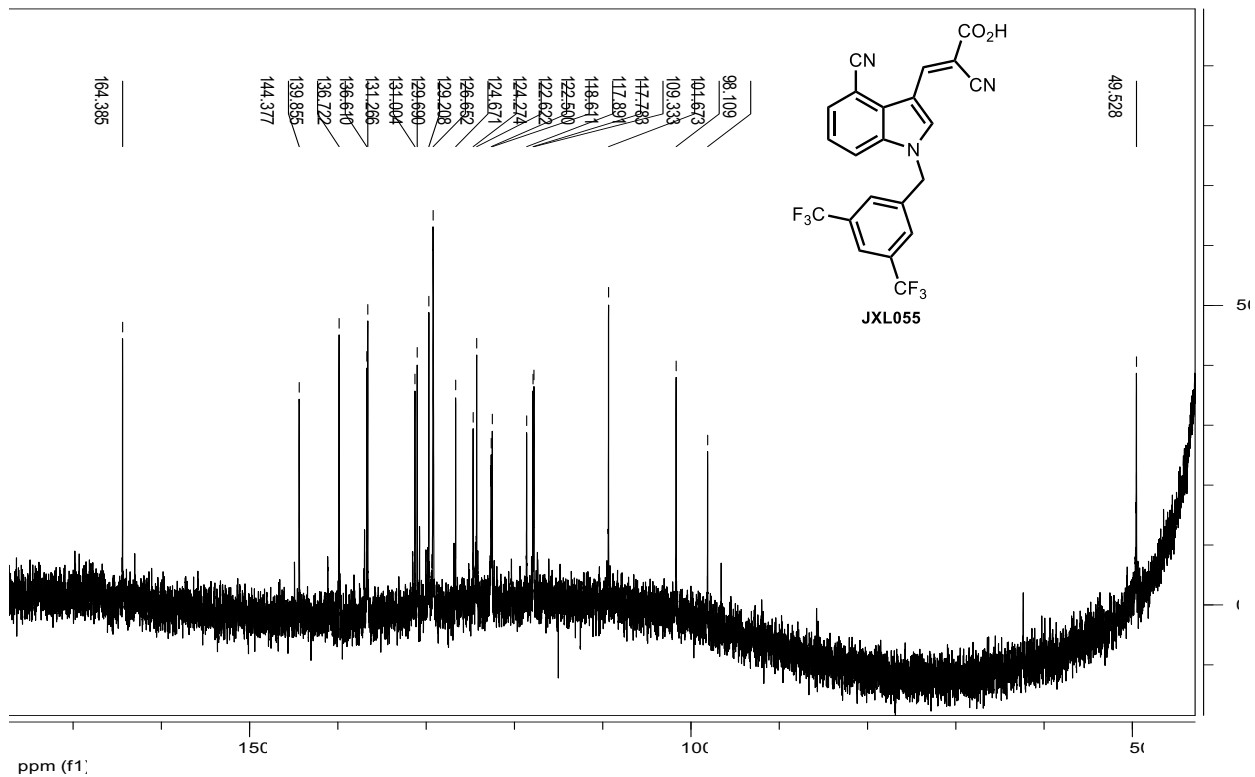

**<sup>13</sup>C NMR (126 MHz, DMSO-d<sub>6</sub>)**

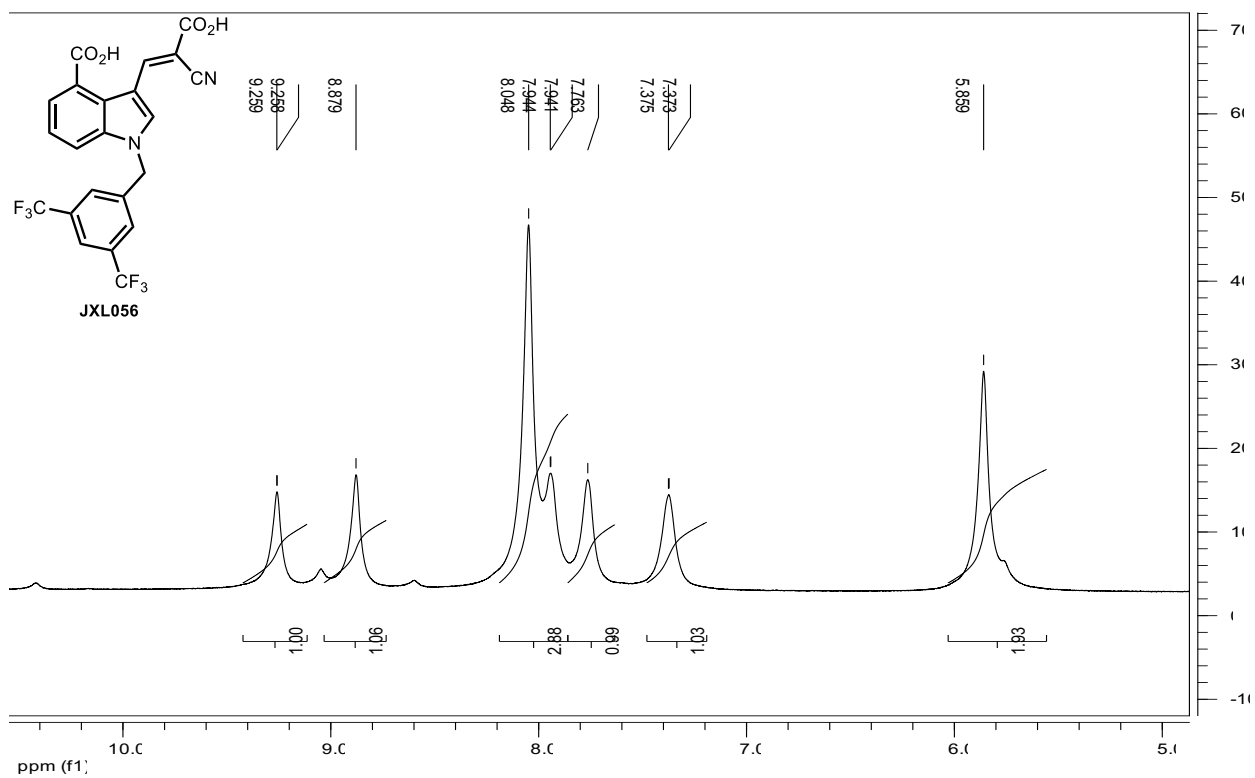

<sup>1</sup>H NMR (500 MHz, DMSO-d<sub>6</sub>)

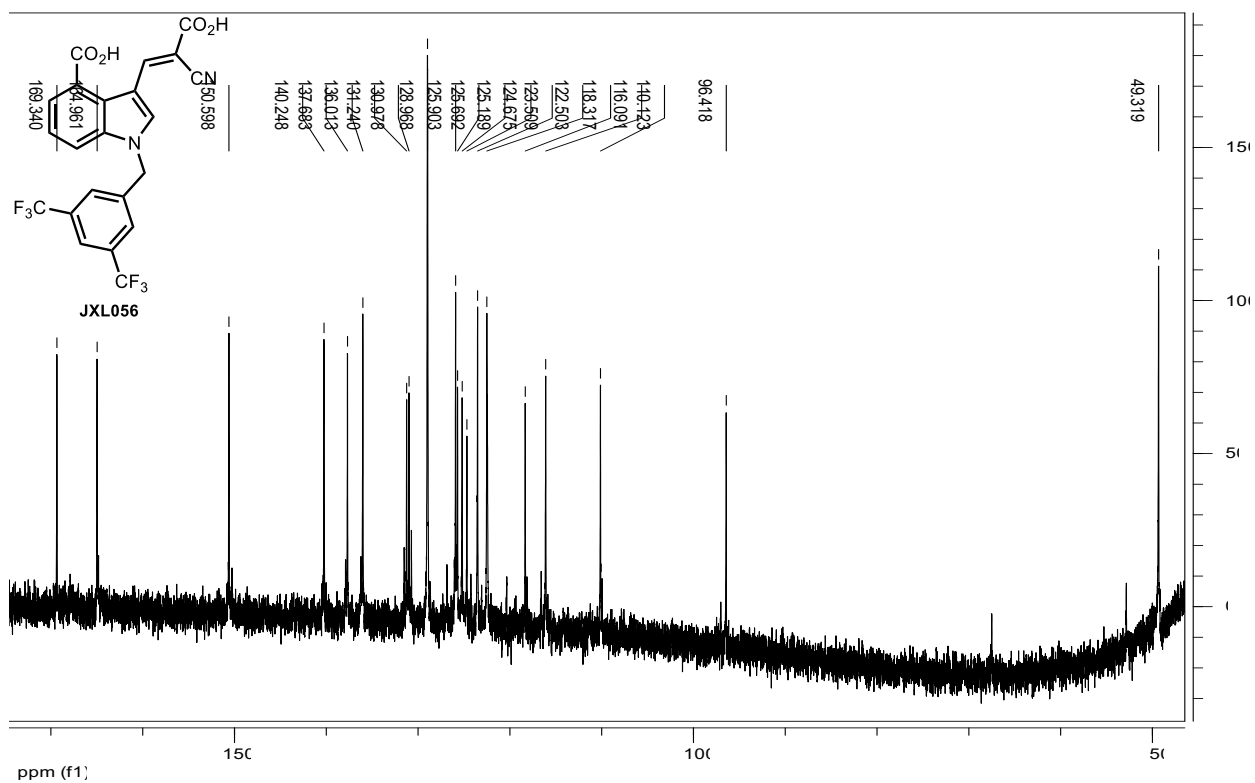

<sup>13</sup>C NMR (126 MHz, DMSO-d<sub>6</sub>)

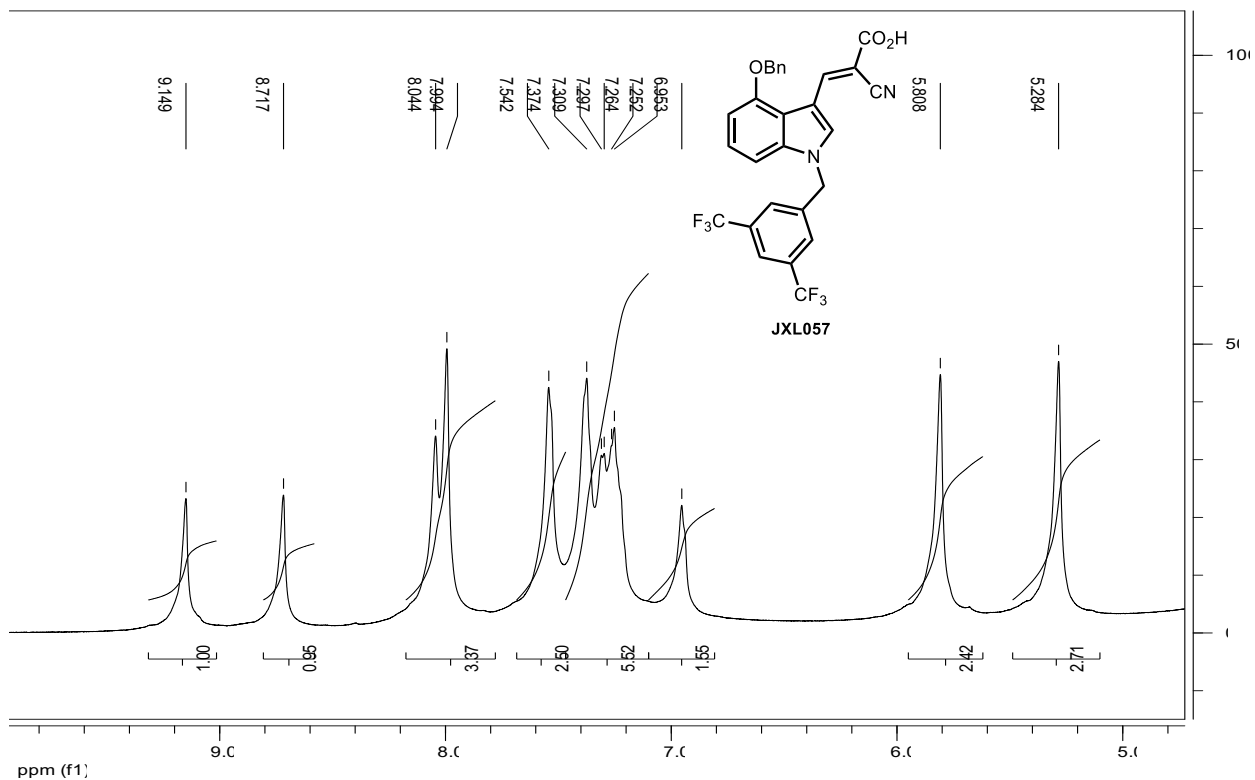

<sup>1</sup>H NMR (500 MHz, DMSO-d<sub>6</sub>)

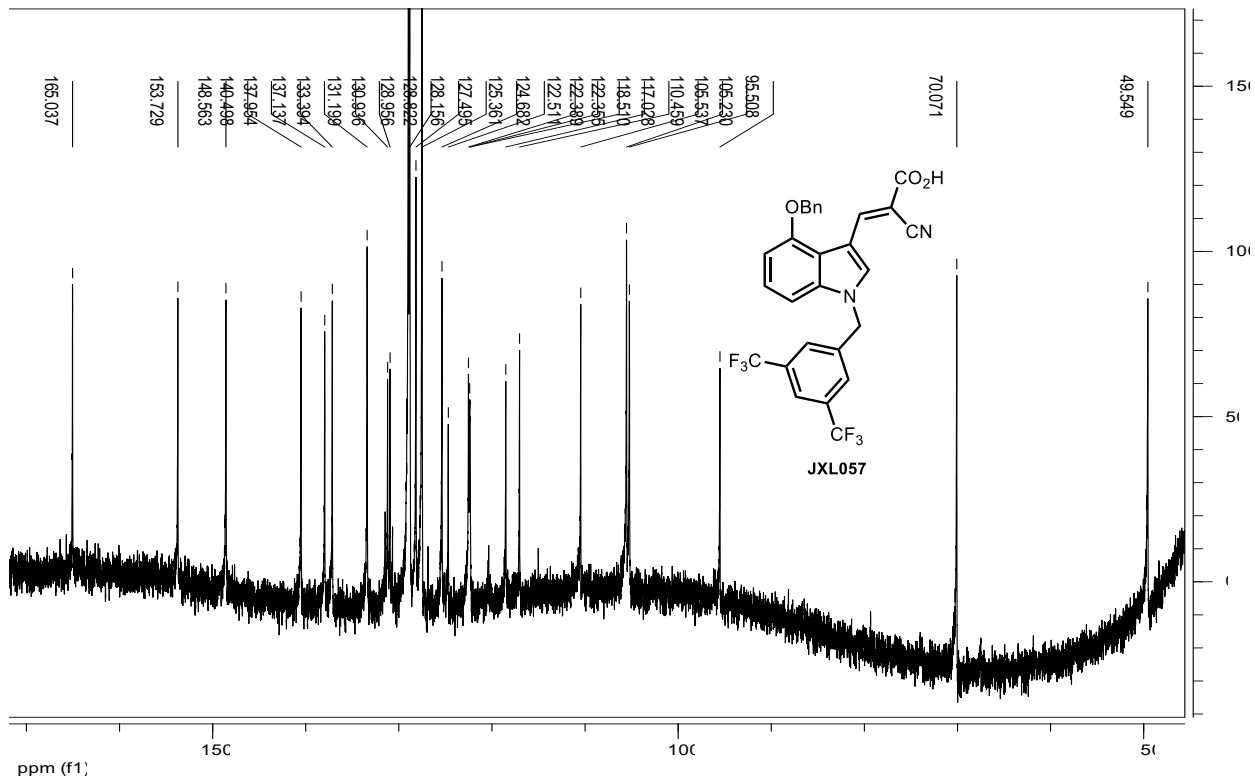

<sup>13</sup>C NMR (126 MHz, DMSO-d<sub>6</sub>)

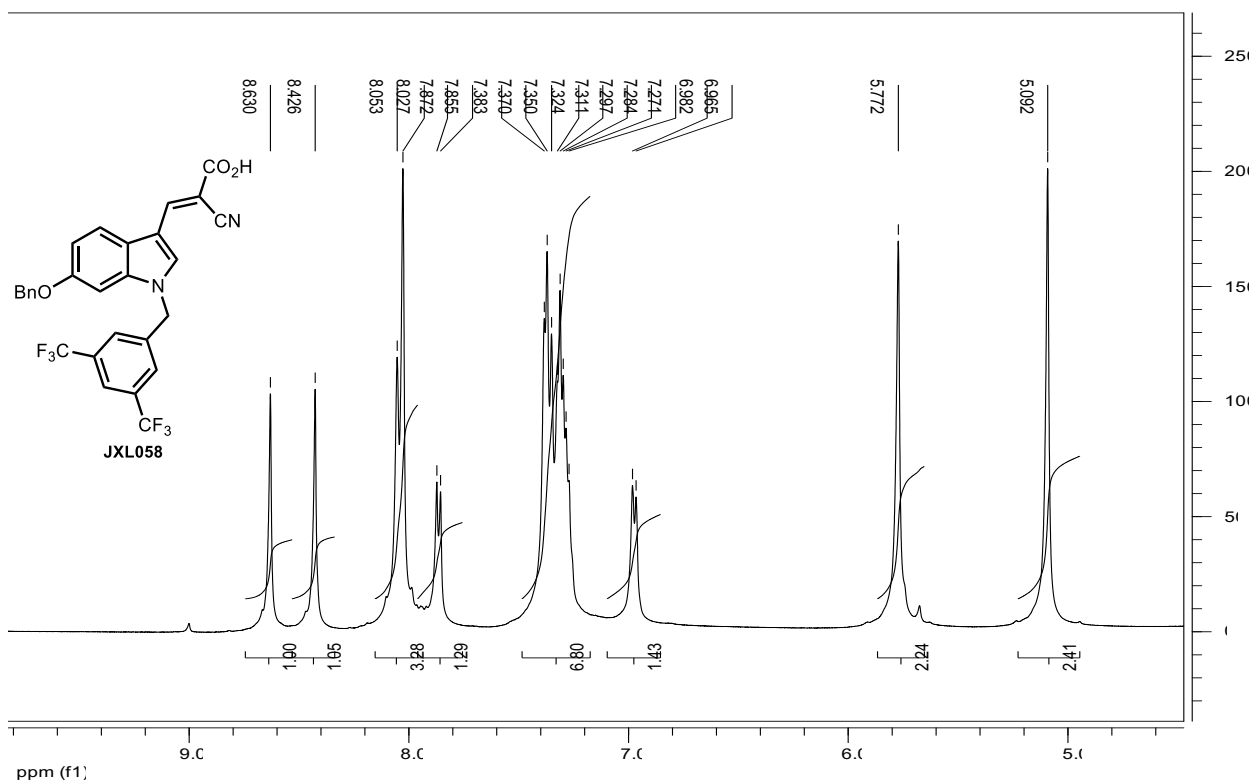

<sup>1</sup>H NMR (500 MHz, DMSO-d<sub>6</sub>)

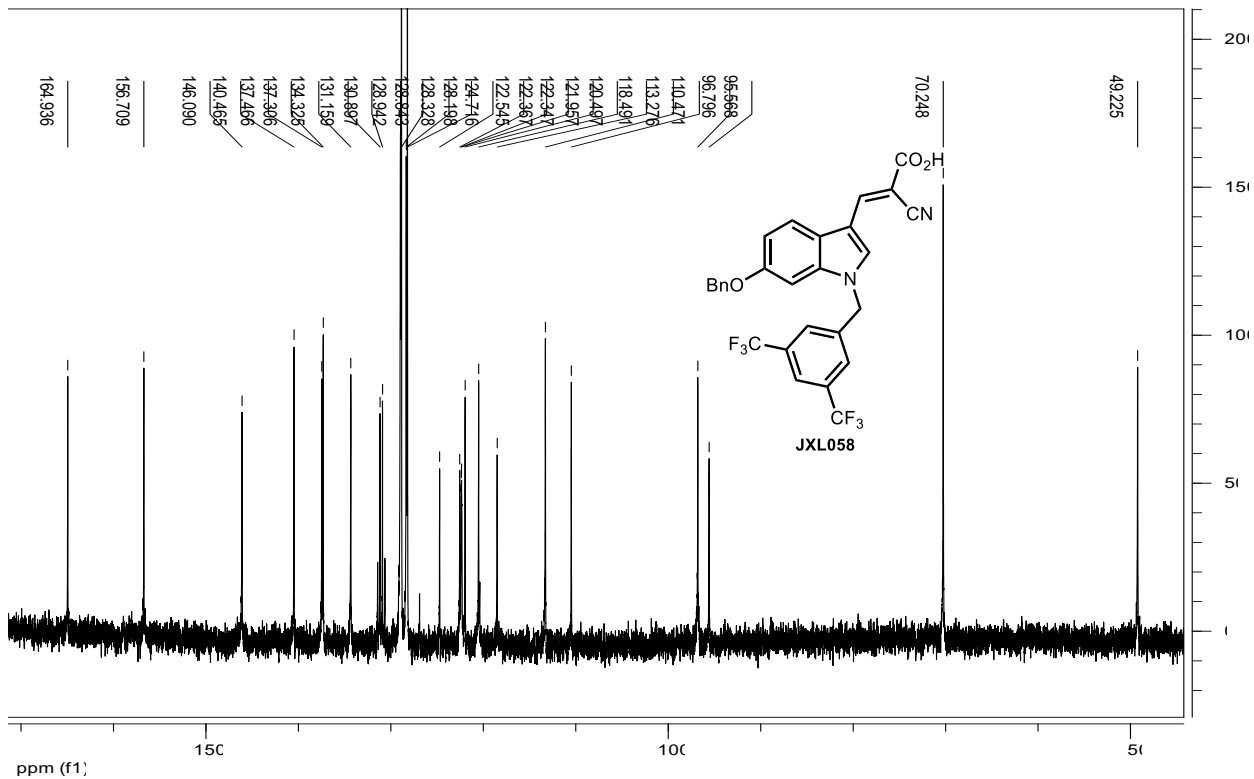

<sup>13</sup>C NMR (126 MHz, DMSO-d<sub>6</sub>)

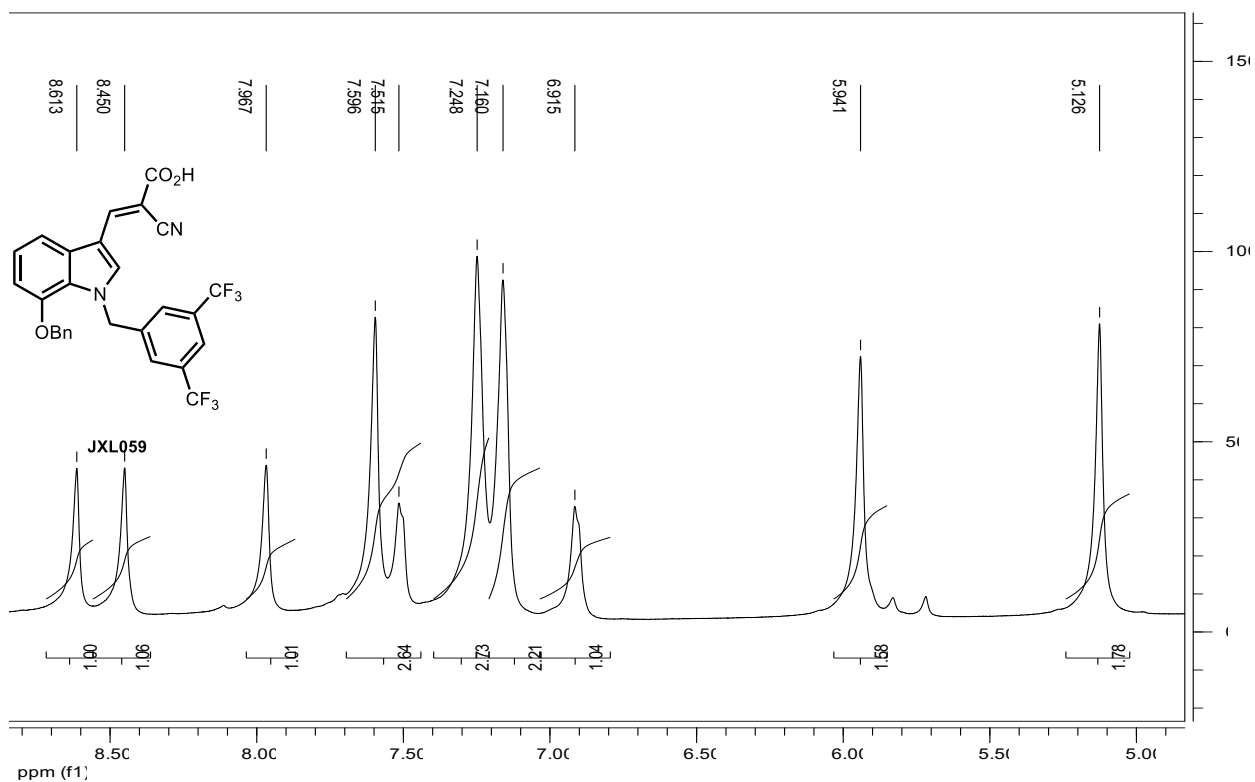

**<sup>1</sup>H NMR (500 MHz, DMSO-d<sub>6</sub>)**

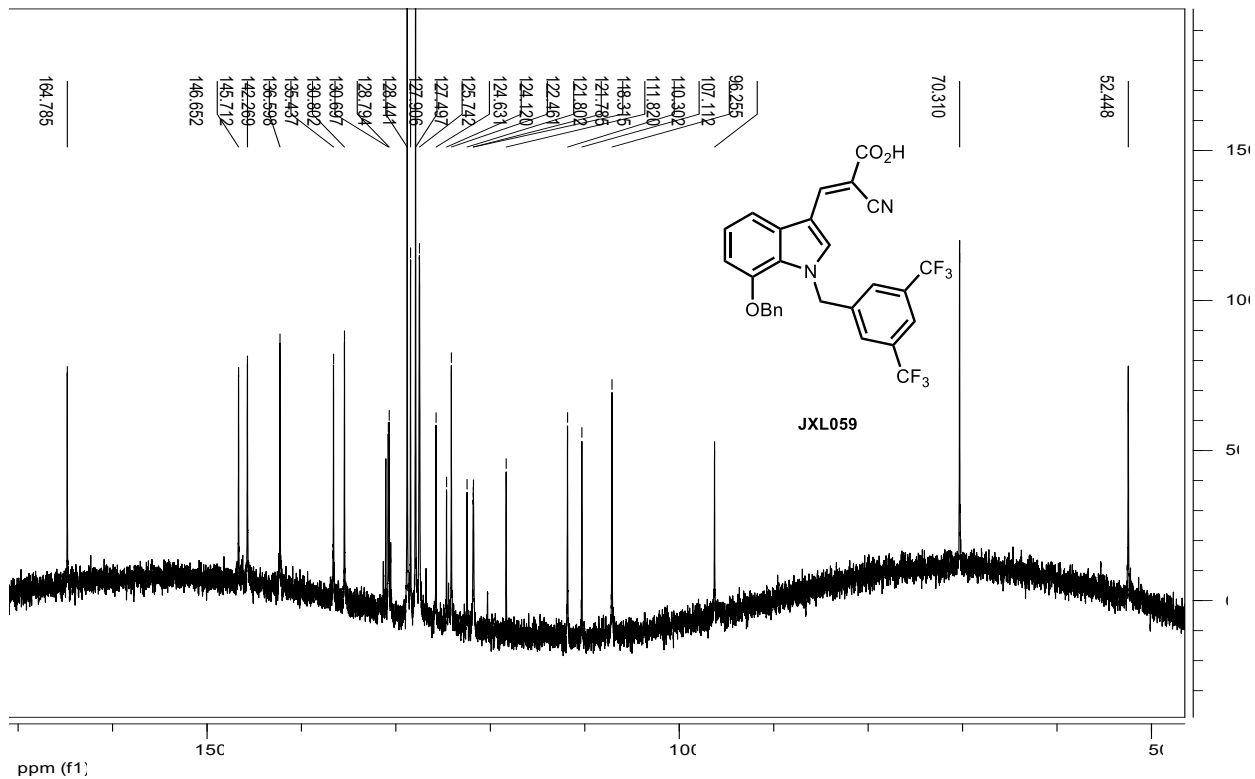

**<sup>13</sup>C NMR (126 MHz, DMSO-d<sub>6</sub>)**

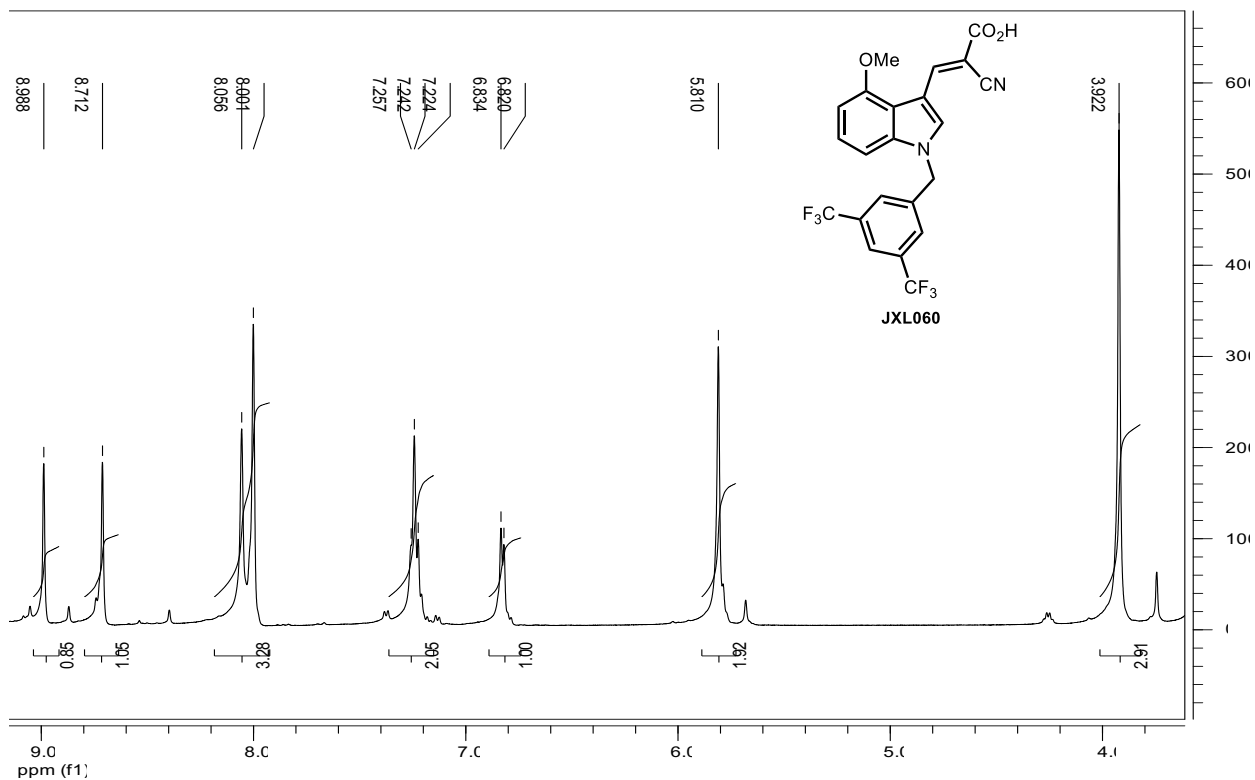

**<sup>1</sup>H NMR (500 MHz, DMSO-d<sub>6</sub>)**

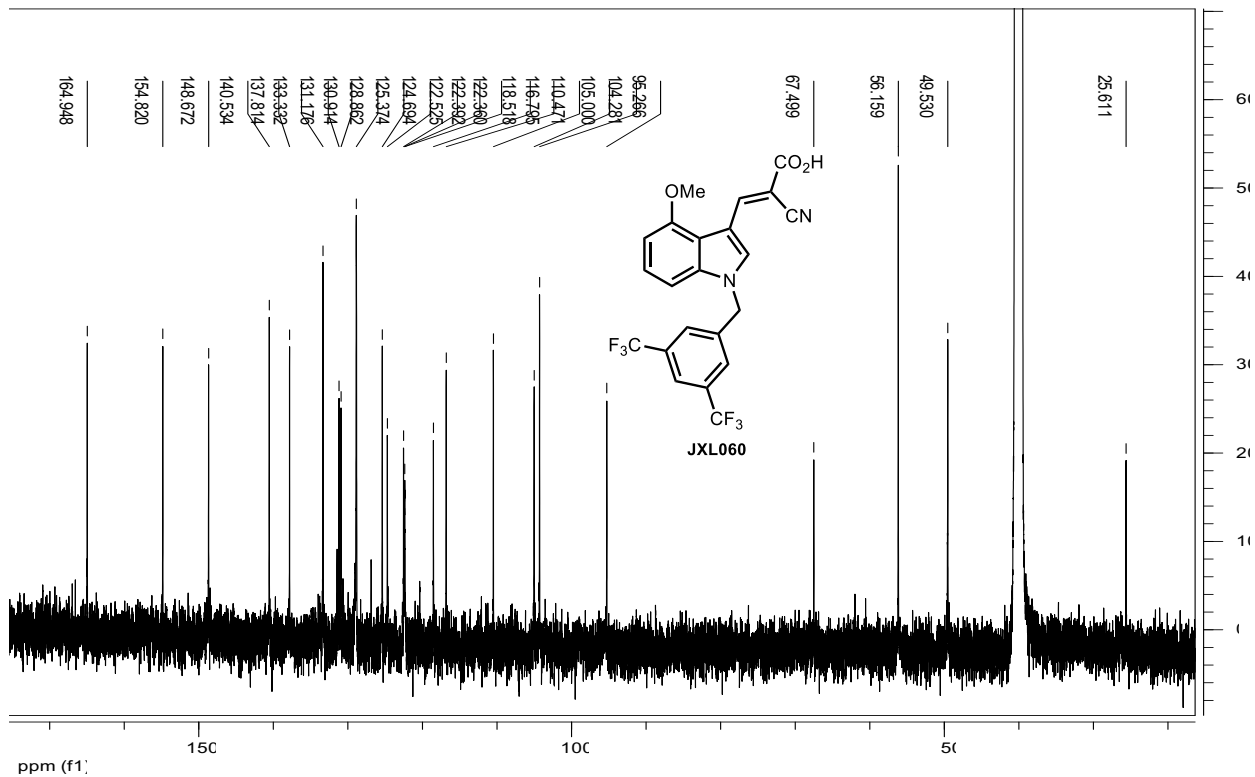

**<sup>13</sup>C NMR (126 MHz, DMSO-d<sub>6</sub>)**



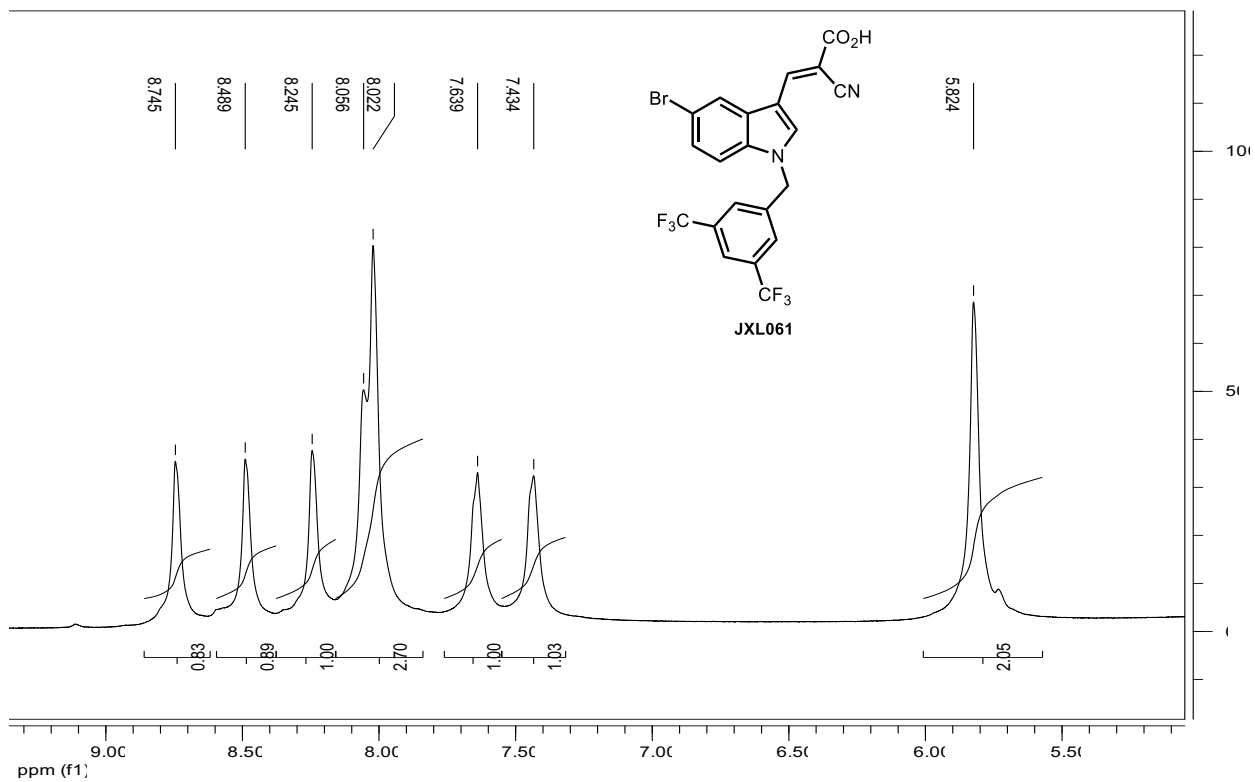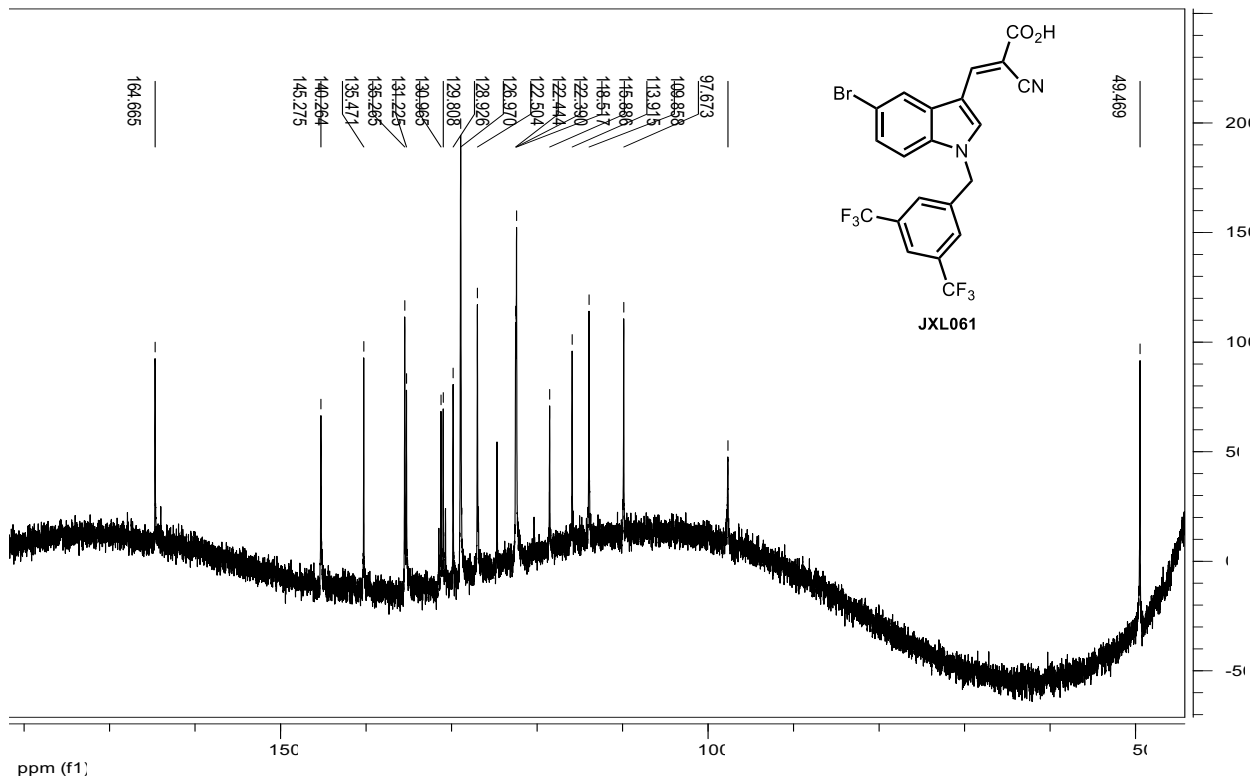

**<sup>13</sup>C NMR (126 MHz, DMSO-d<sub>6</sub>)**

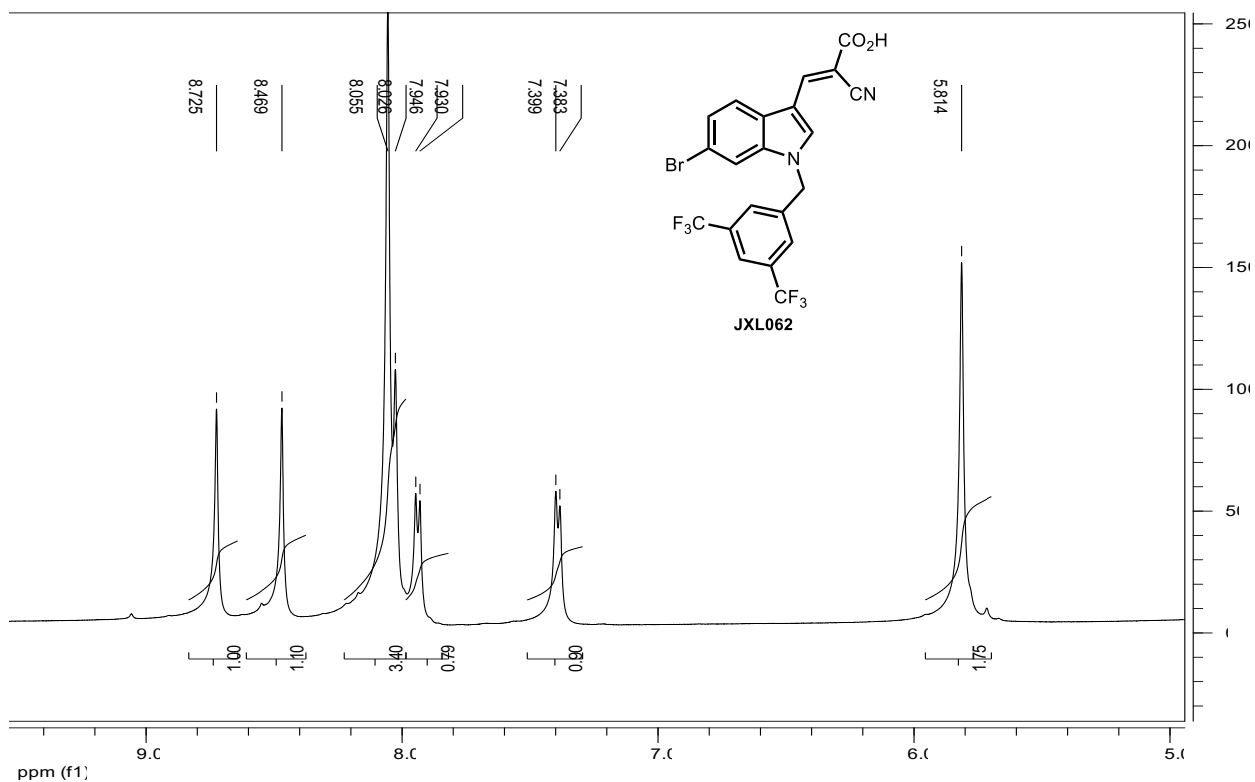

<sup>1</sup>H NMR (500 MHz, DMSO-d<sub>6</sub>)

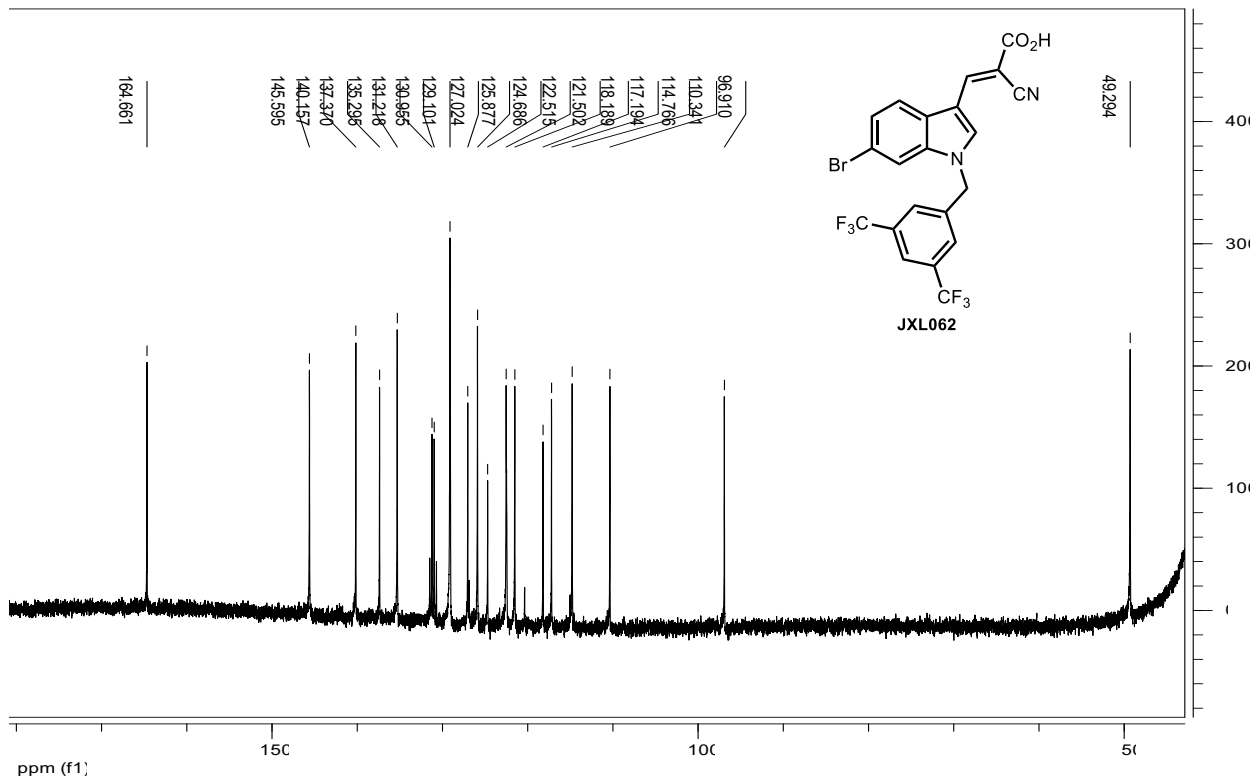

<sup>13</sup>C NMR (126 MHz, DMSO-d<sub>6</sub>)

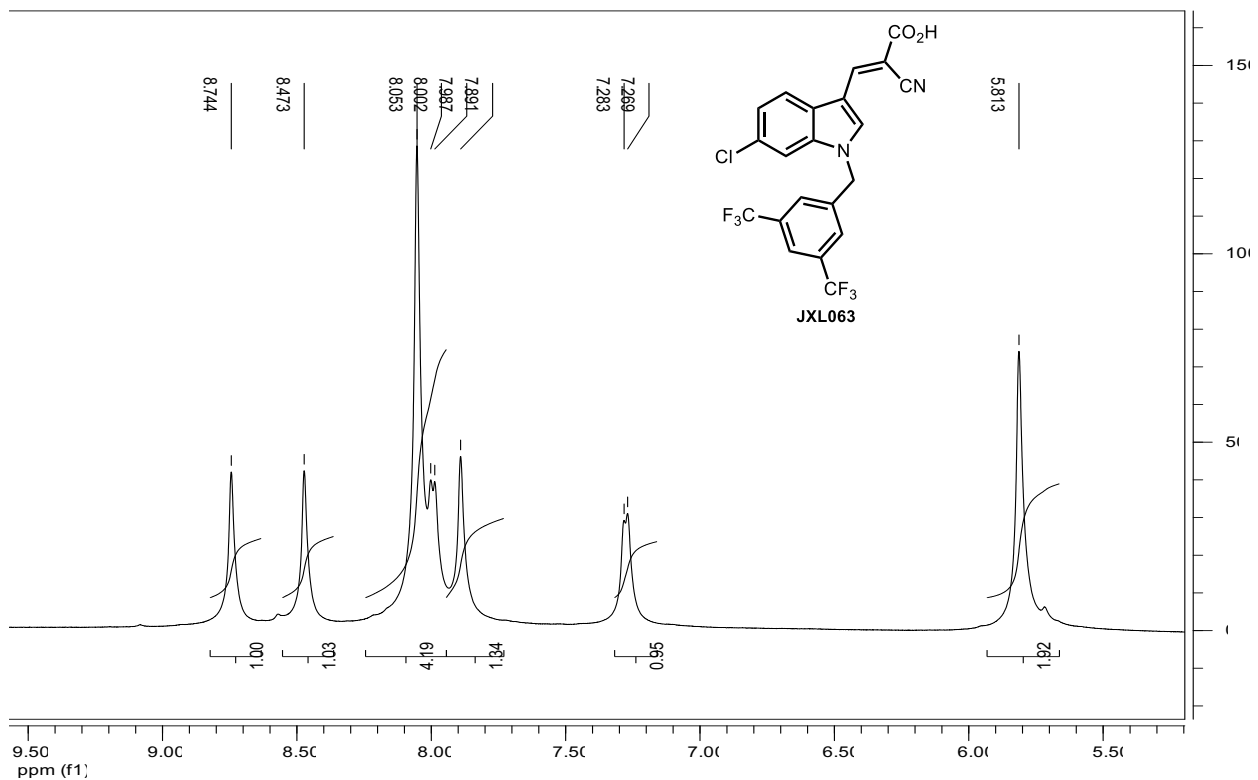

<sup>1</sup>H NMR (500 MHz, DMSO-d<sub>6</sub>)

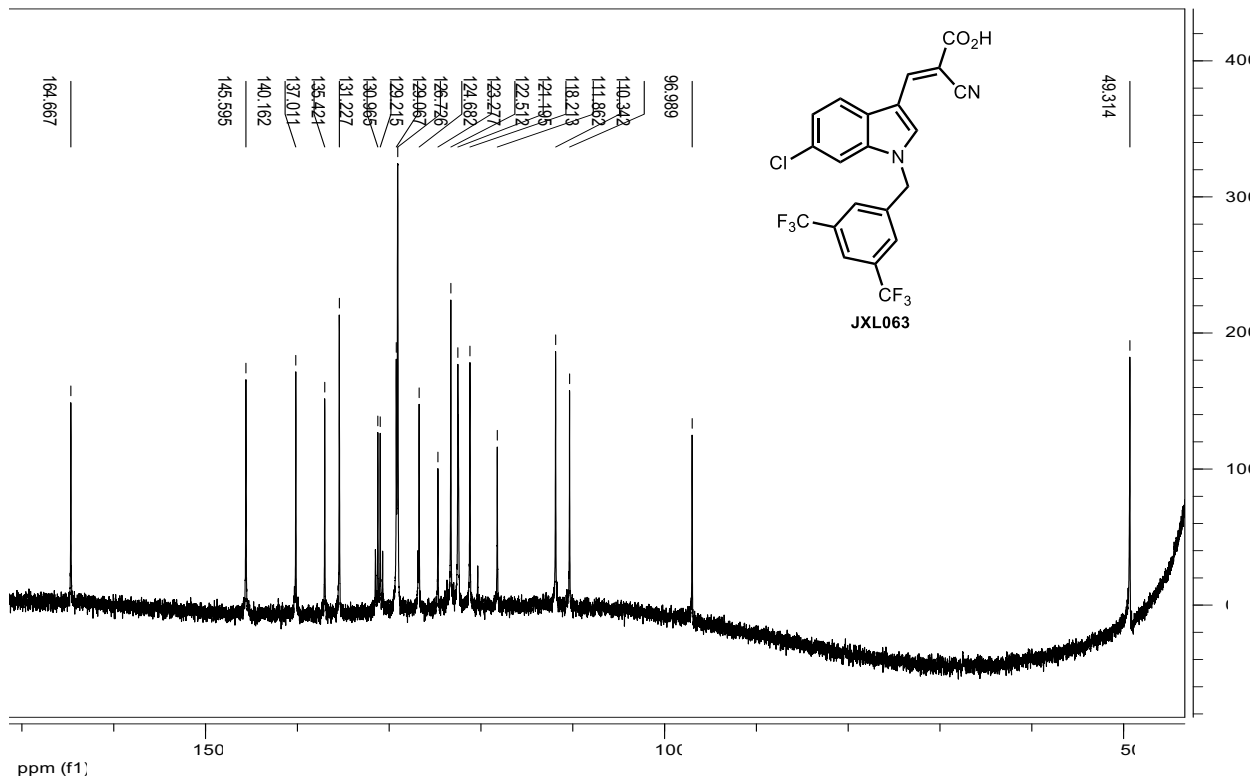

<sup>13</sup>C NMR (126 MHz, DMSO-d<sub>6</sub>)

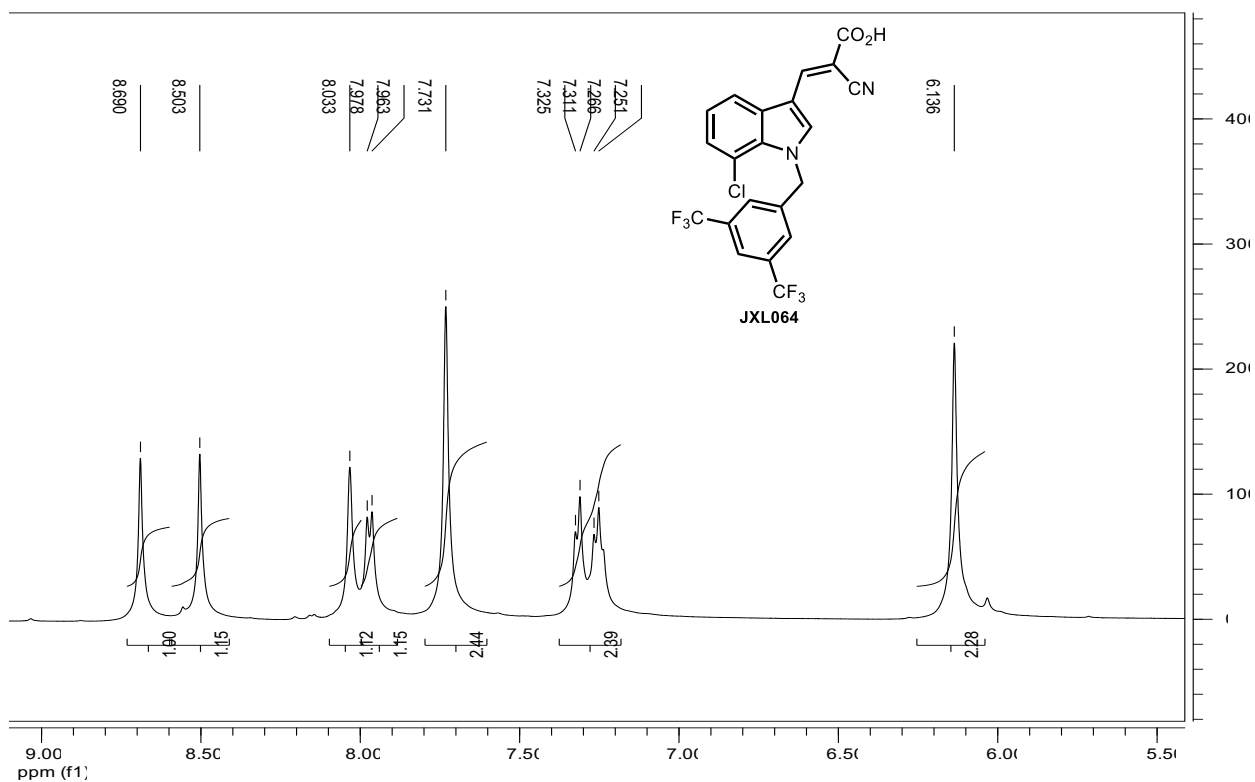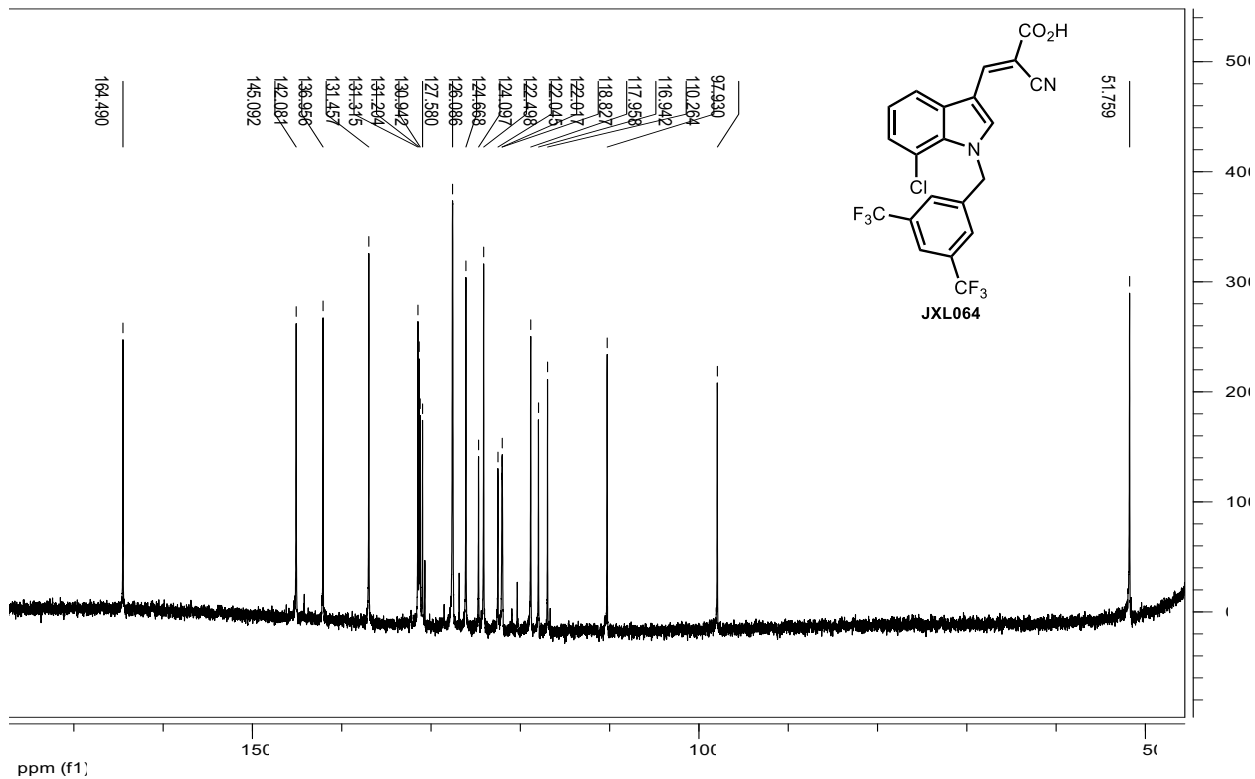

<sup>13</sup>C NMR (126 MHz, DMSO-d<sub>6</sub>)

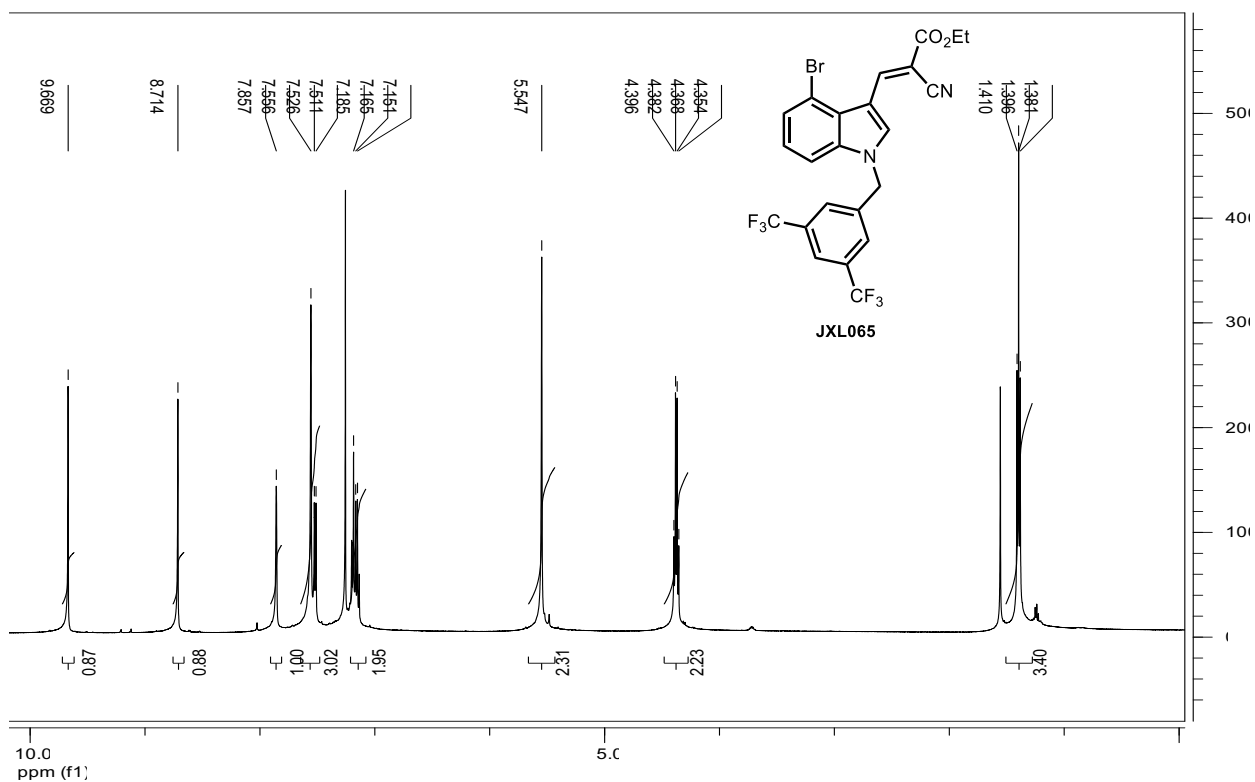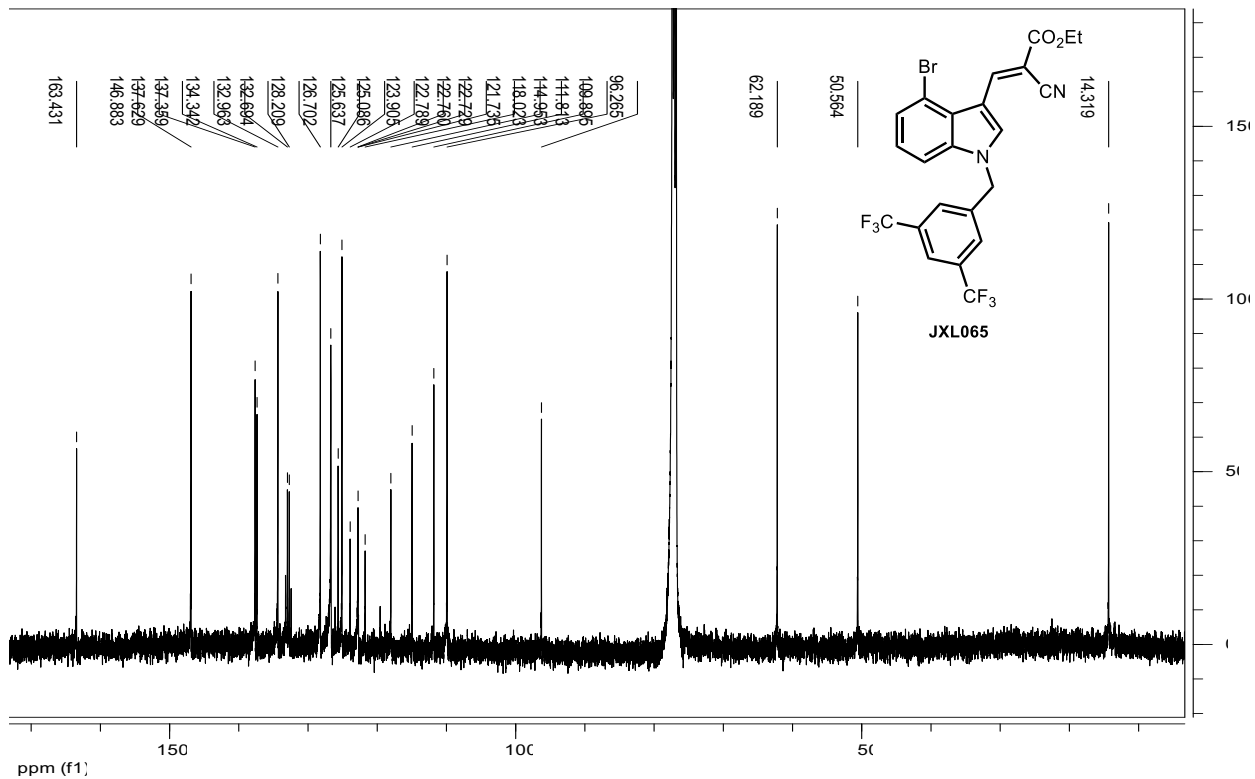

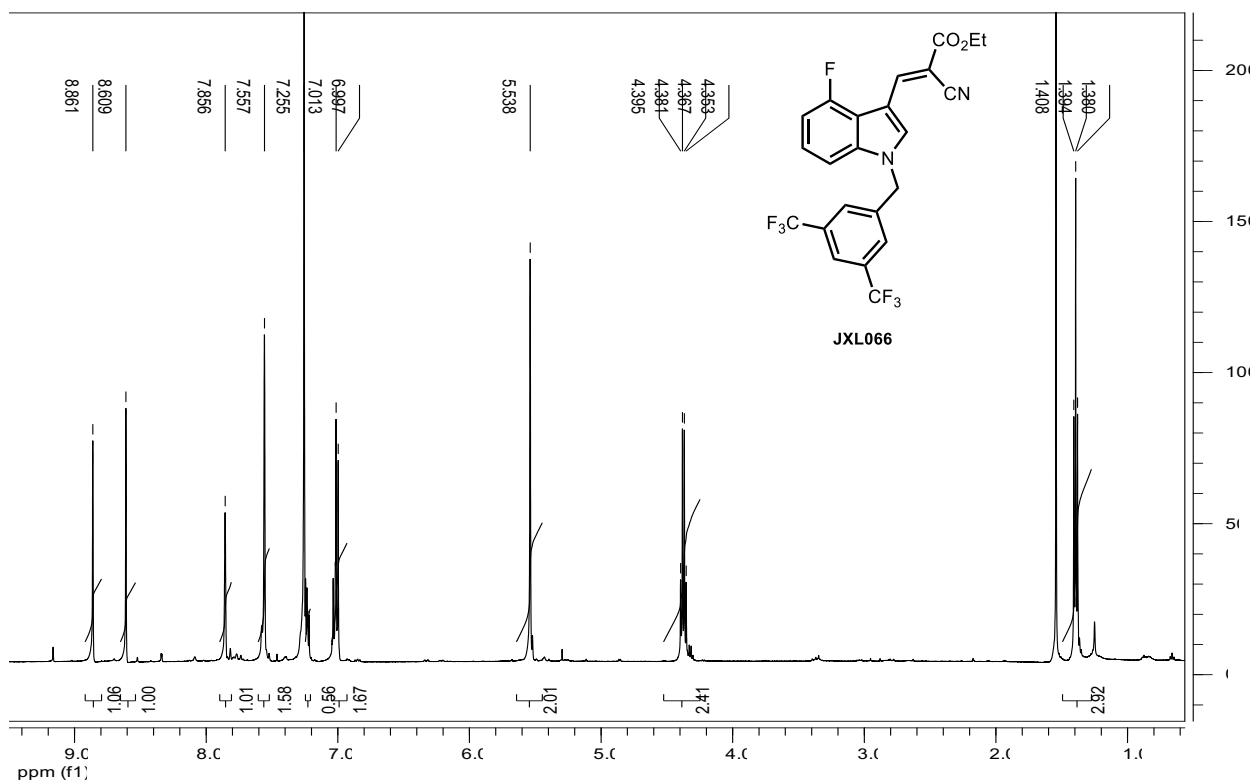

<sup>1</sup>H NMR (500 MHz, DMSO-d<sub>6</sub>)

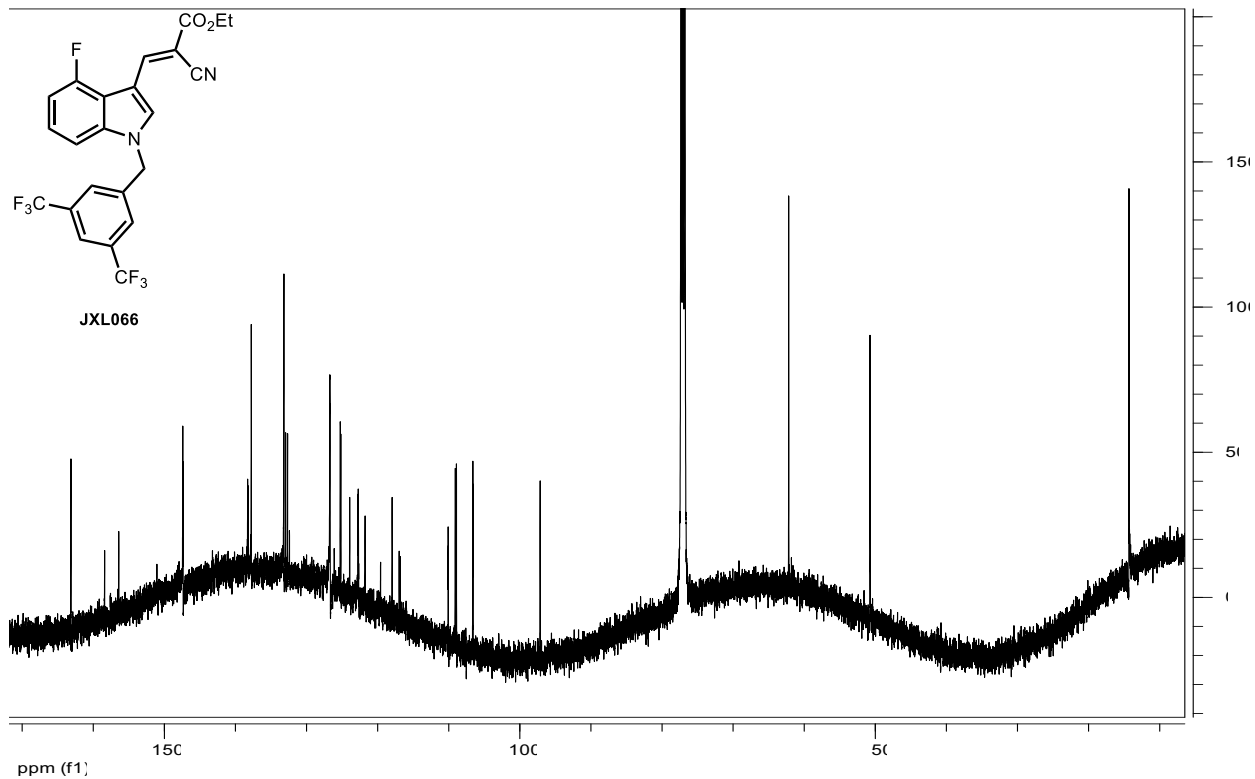

<sup>13</sup>C NMR (126 MHz, DMSO-d<sub>6</sub>)

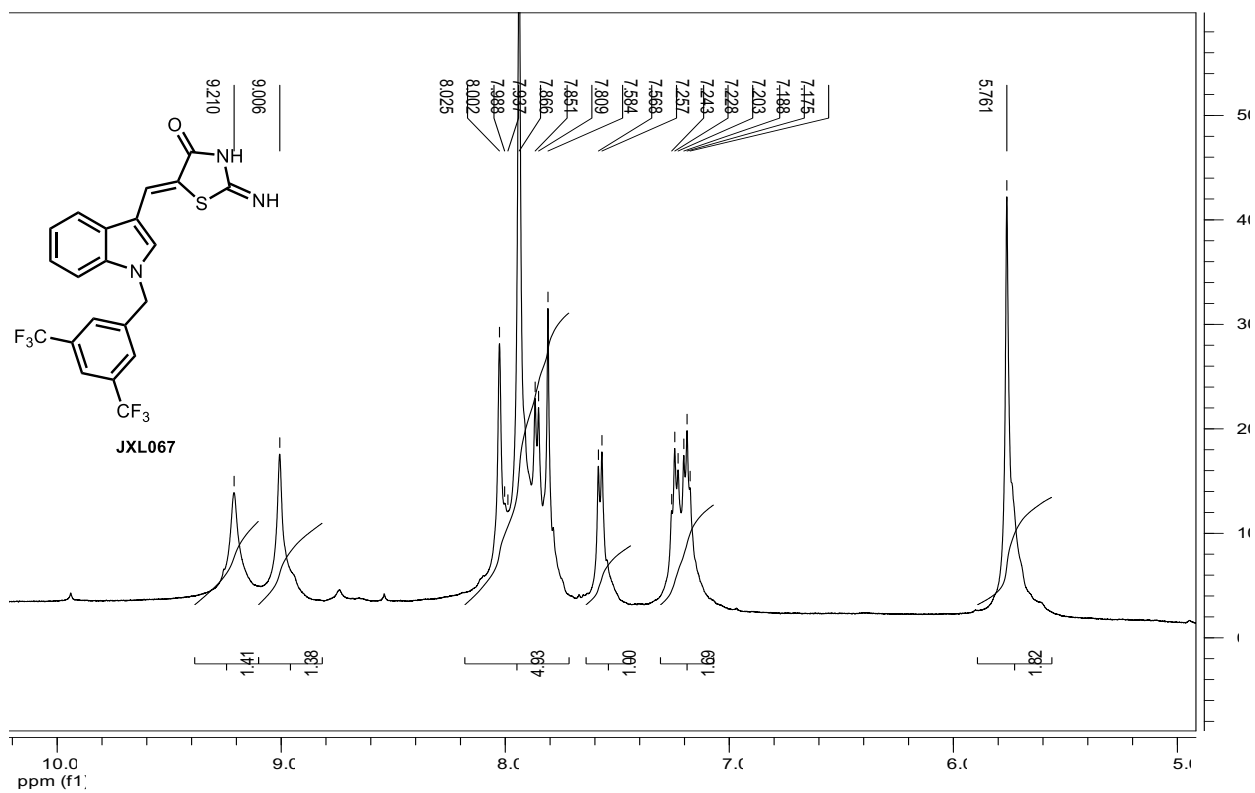

<sup>1</sup>H NMR (500 MHz, DMSO-d<sub>6</sub>)

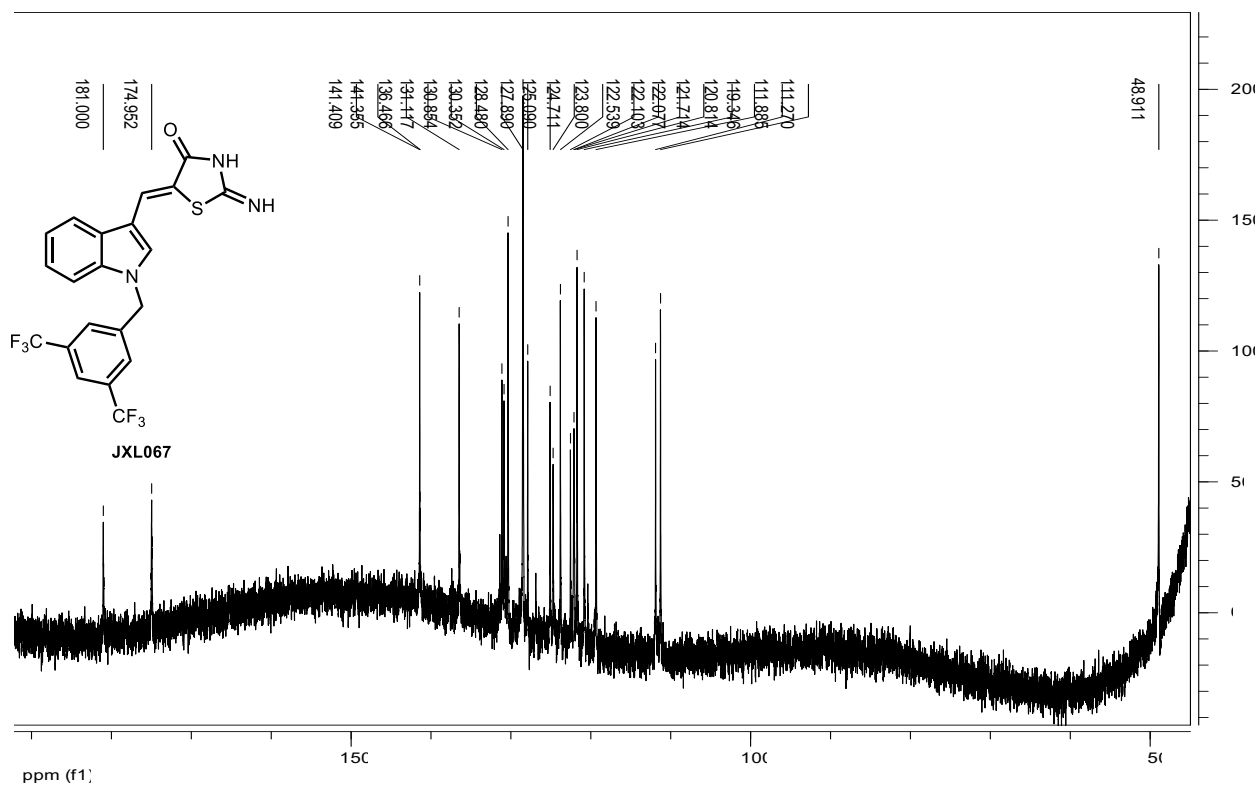

<sup>13</sup>C NMR (126 MHz, DMSO-d<sub>6</sub>)





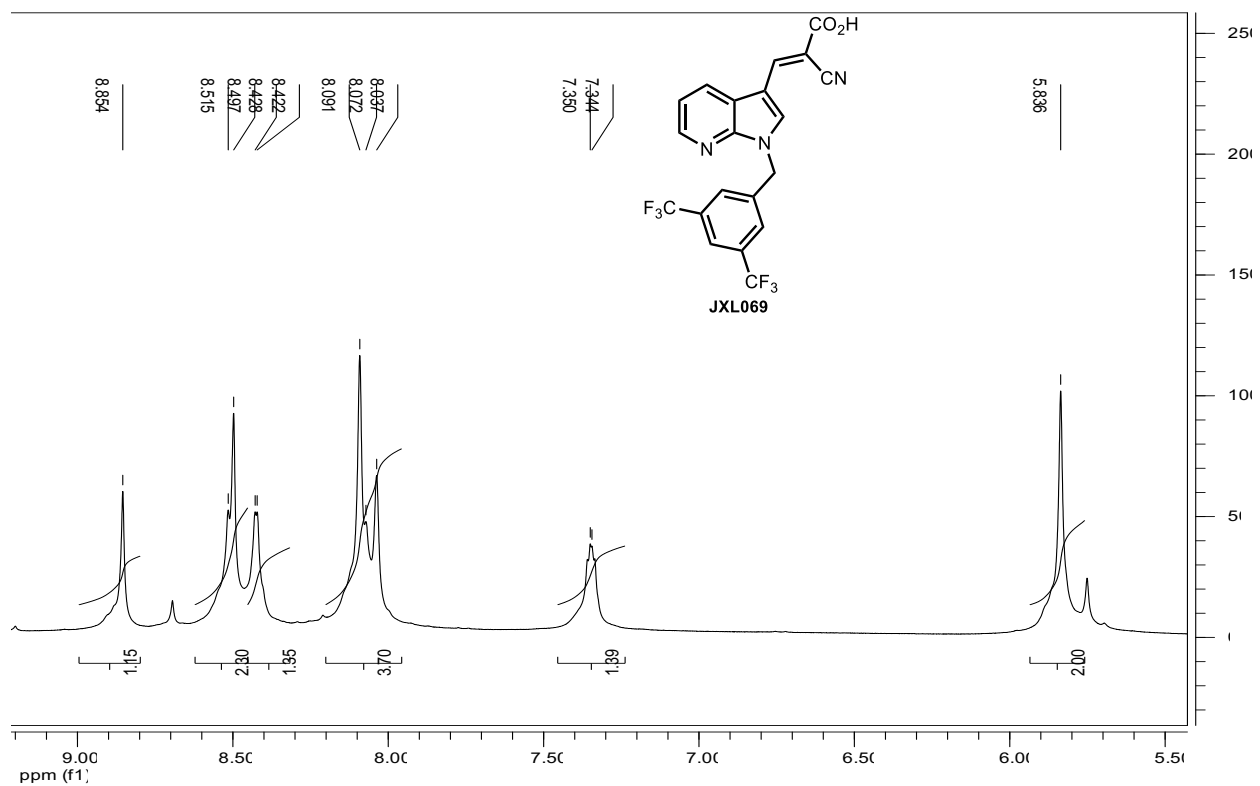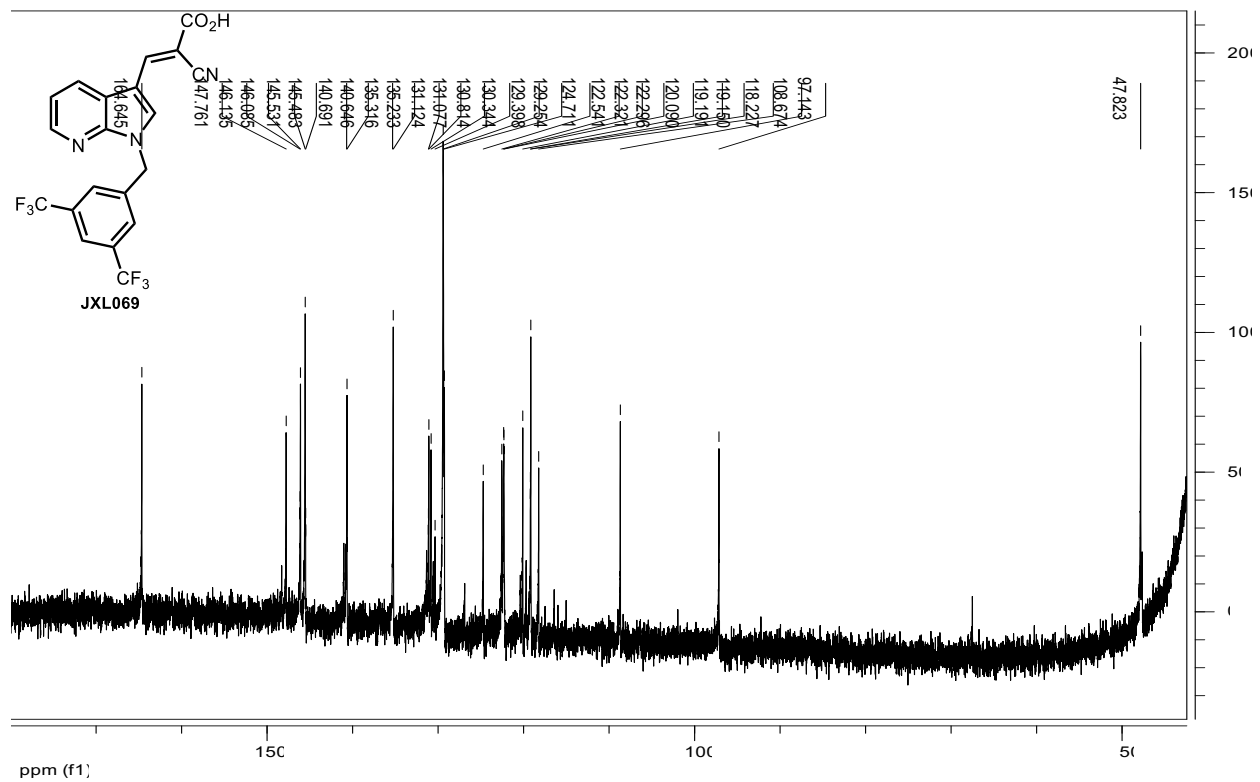

<sup>13</sup>C NMR (126 MHz, DMSO-d<sub>6</sub>)

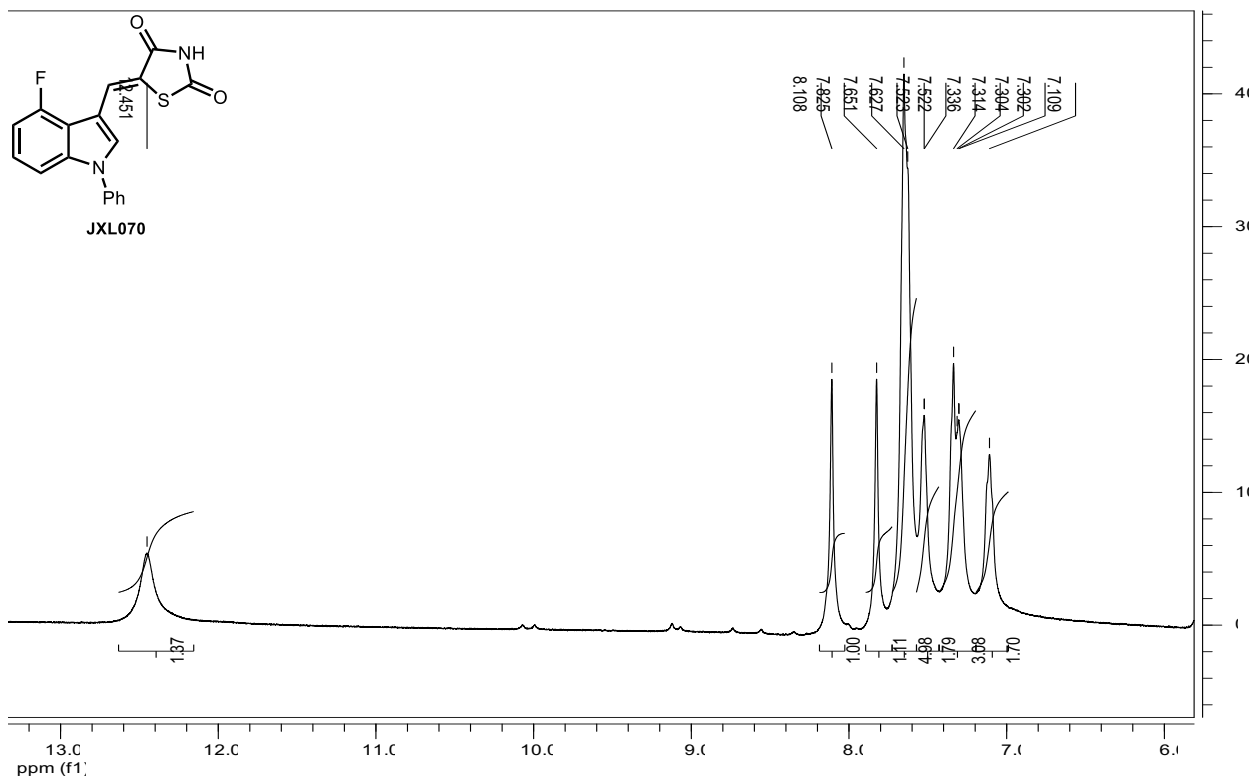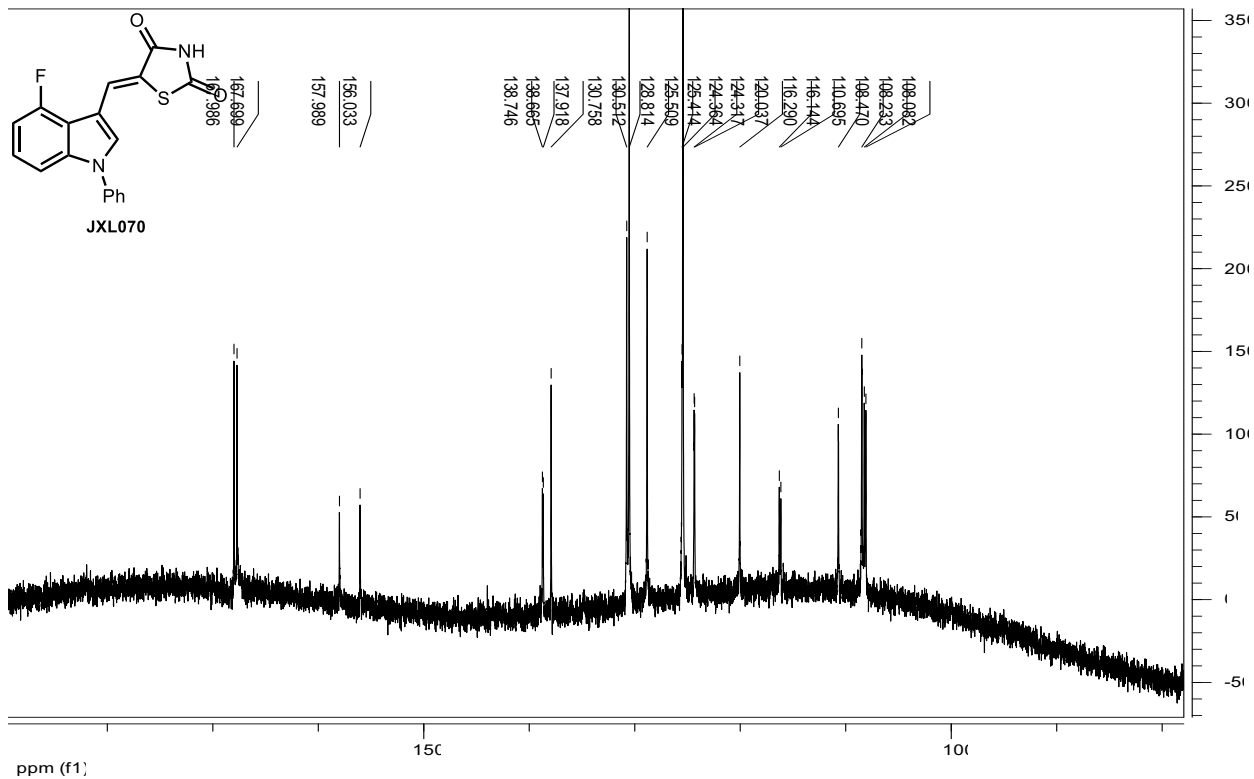

**<sup>13</sup>C NMR (126 MHz, DMSO-d<sub>6</sub>)**

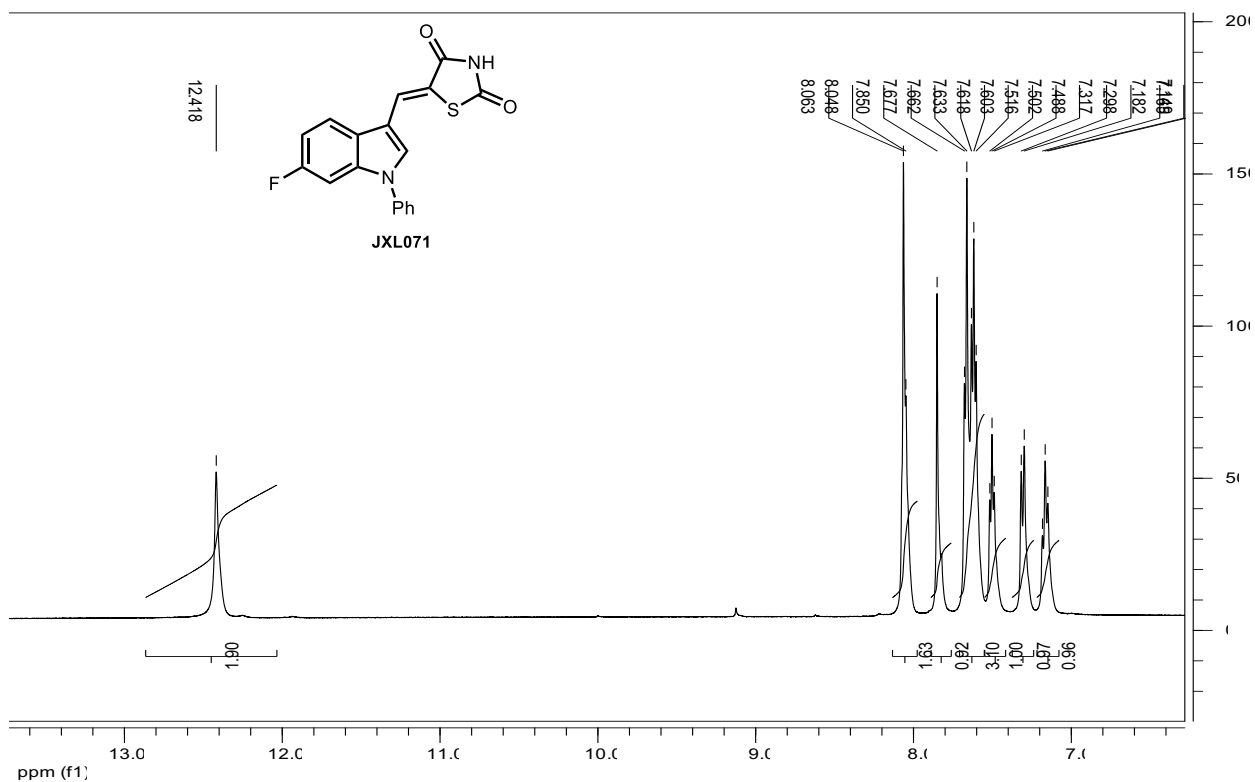

<sup>1</sup>H NMR (500 MHz, DMSO-d<sub>6</sub>)

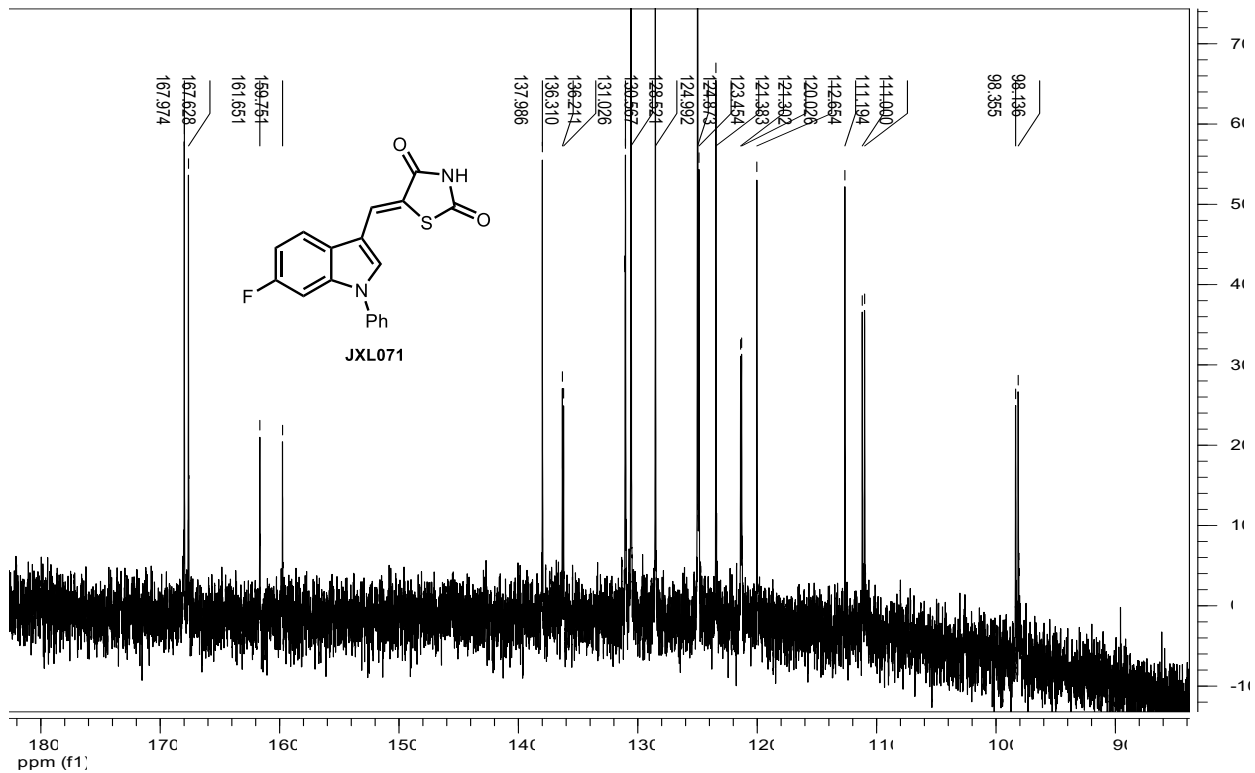

<sup>13</sup>C NMR (126 MHz, DMSO-d<sub>6</sub>)

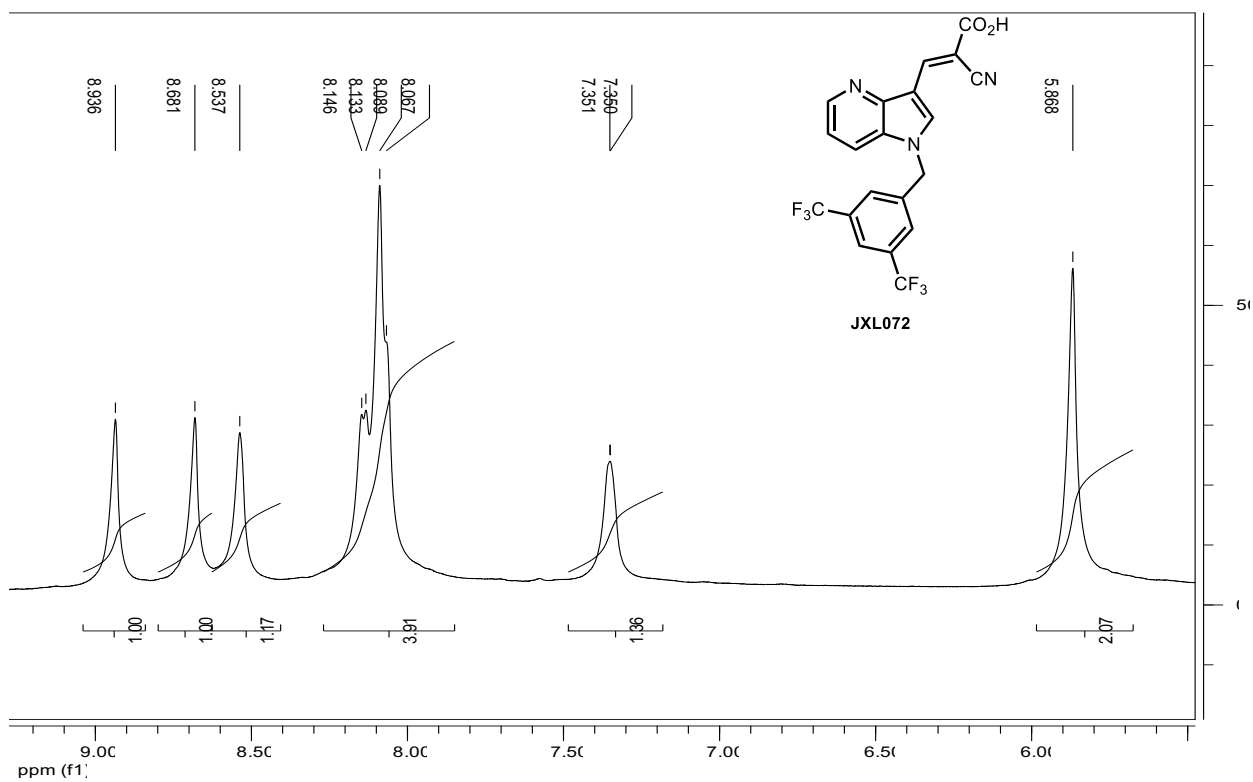

<sup>1</sup>H NMR (500 MHz, DMSO-d<sub>6</sub>)

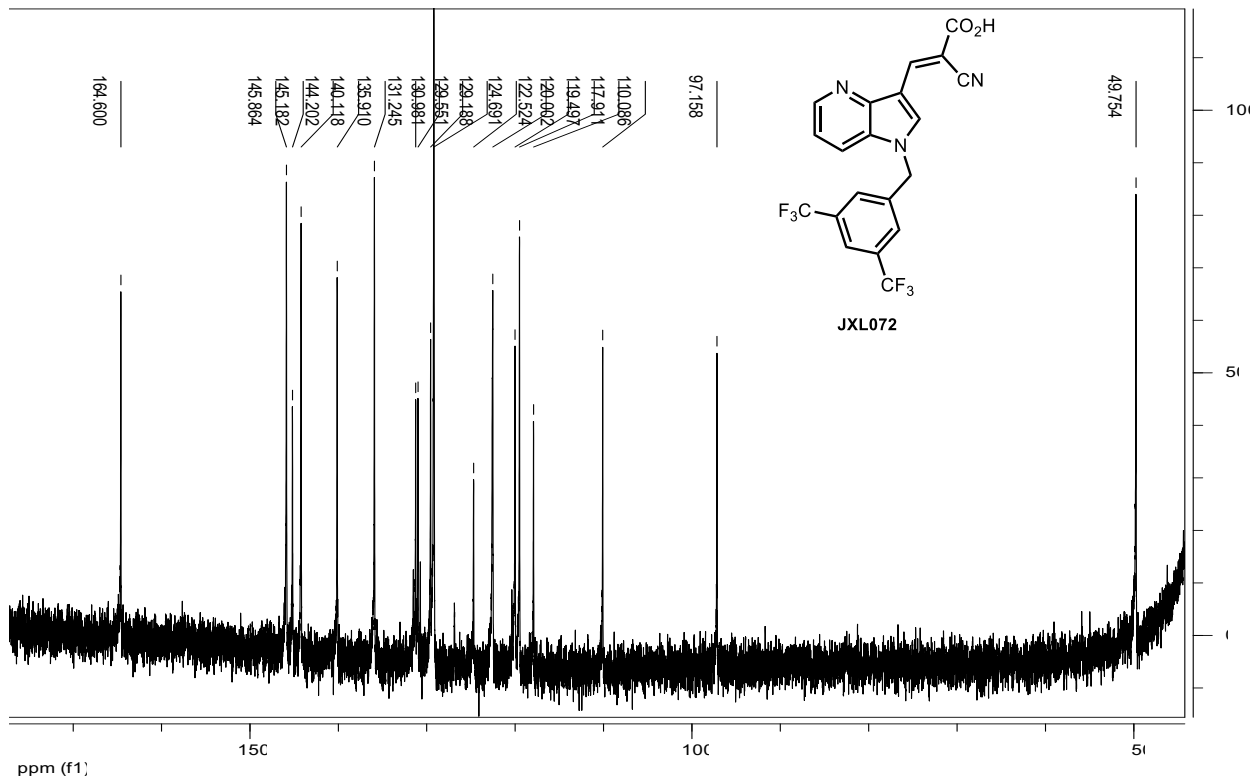

<sup>13</sup>C NMR (126 MHz, DMSO-d<sub>6</sub>)

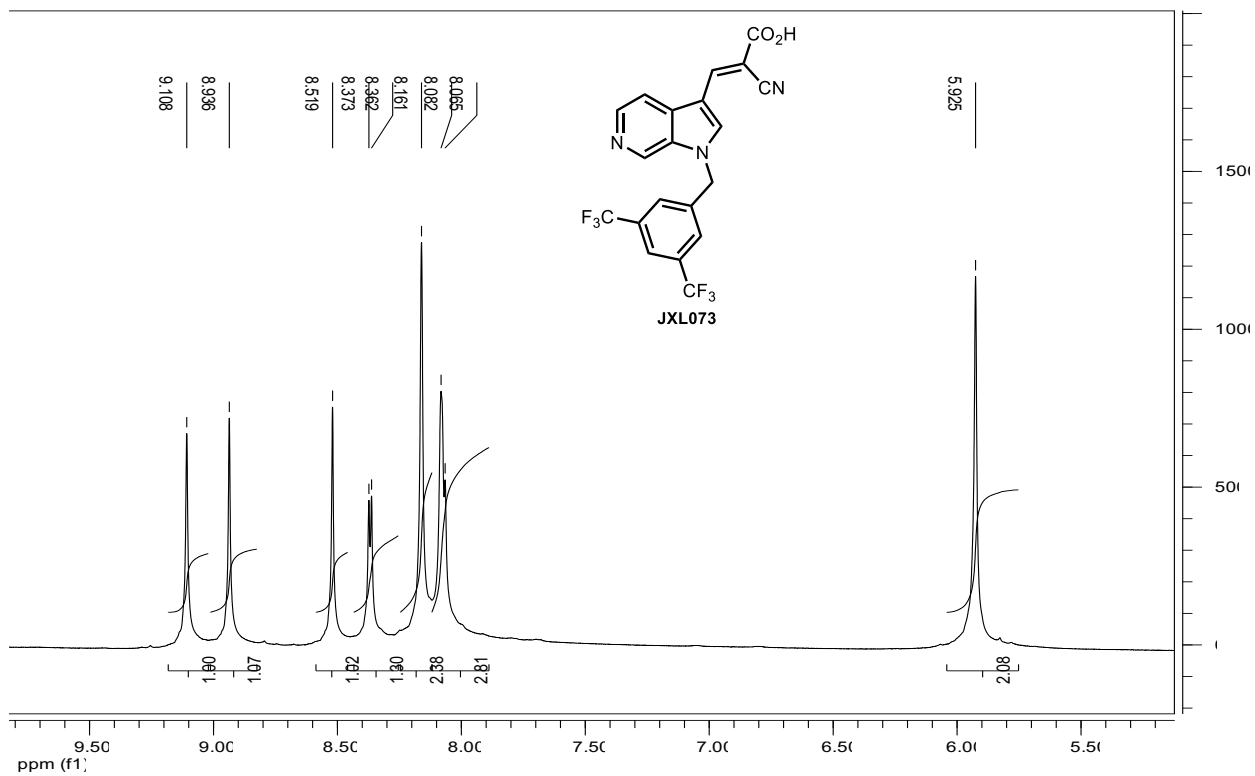

<sup>1</sup>H NMR (500 MHz, DMSO-d<sub>6</sub>)

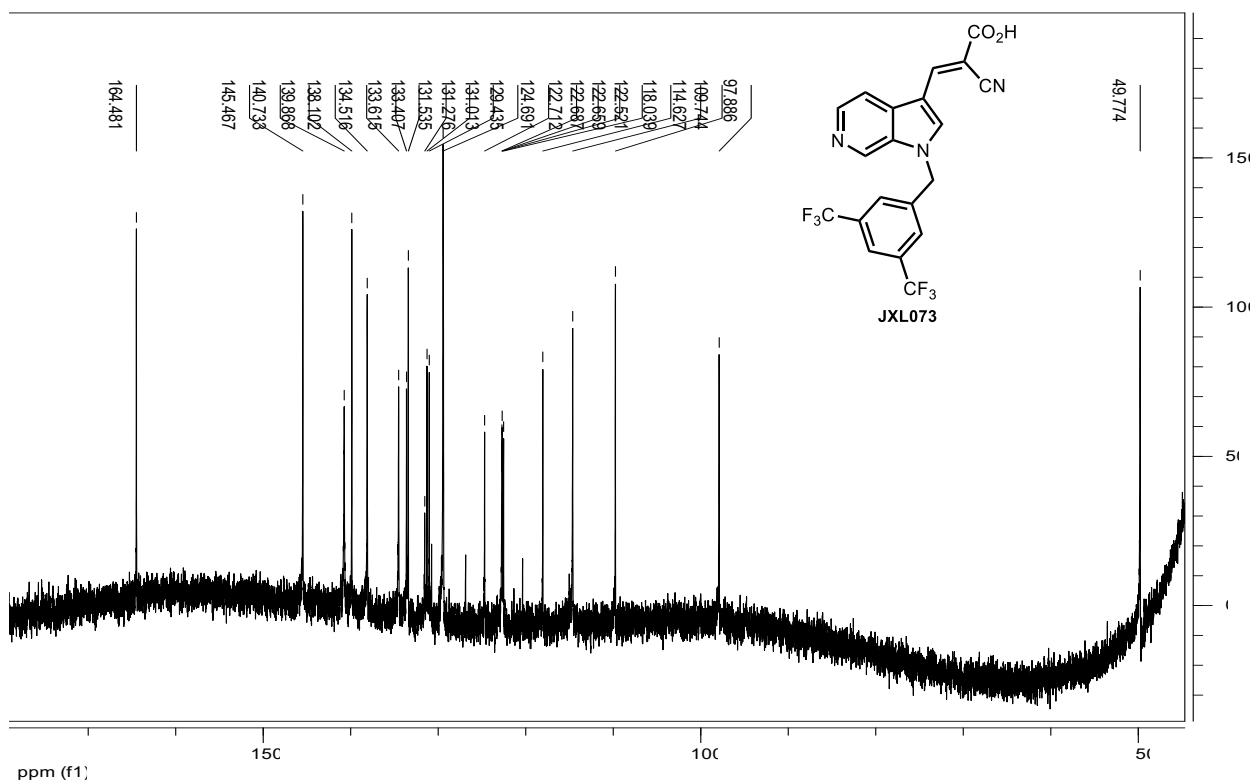

<sup>13</sup>C NMR (126 MHz, DMSO-d<sub>6</sub>)

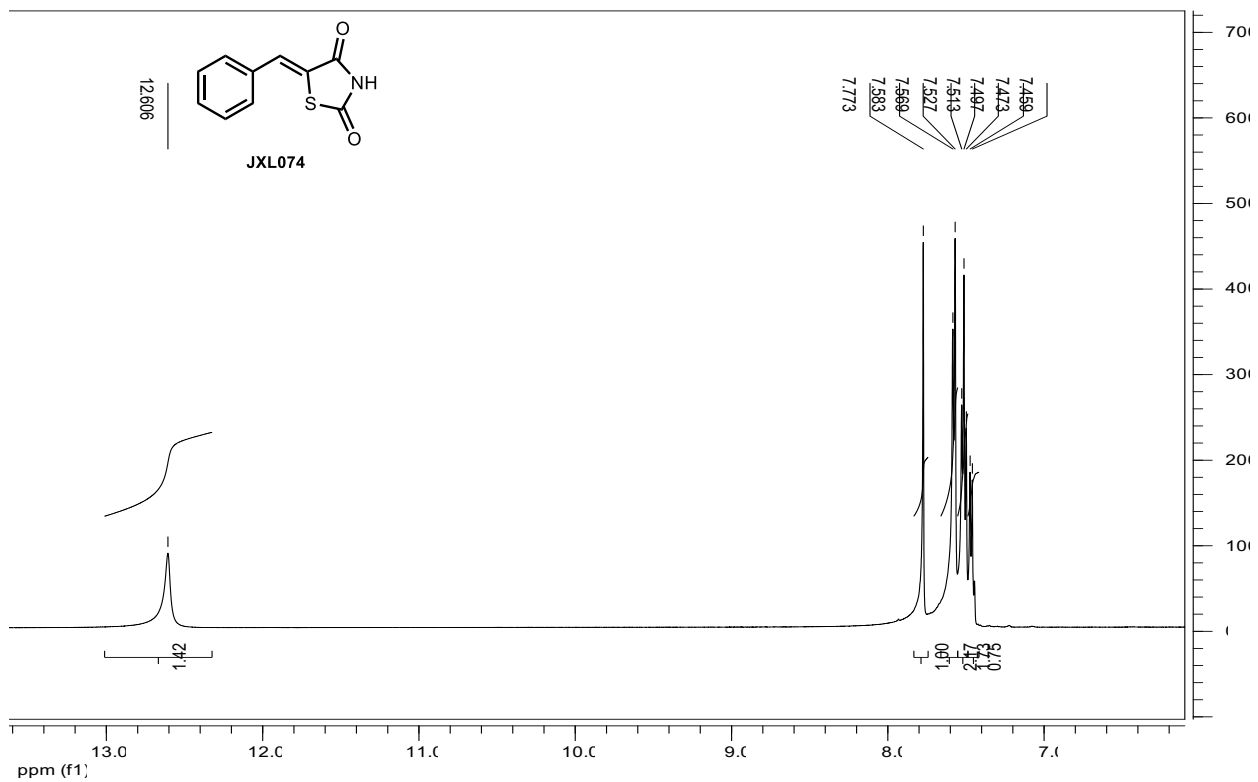

<sup>1</sup>H NMR (500 MHz, DMSO-d<sub>6</sub>)

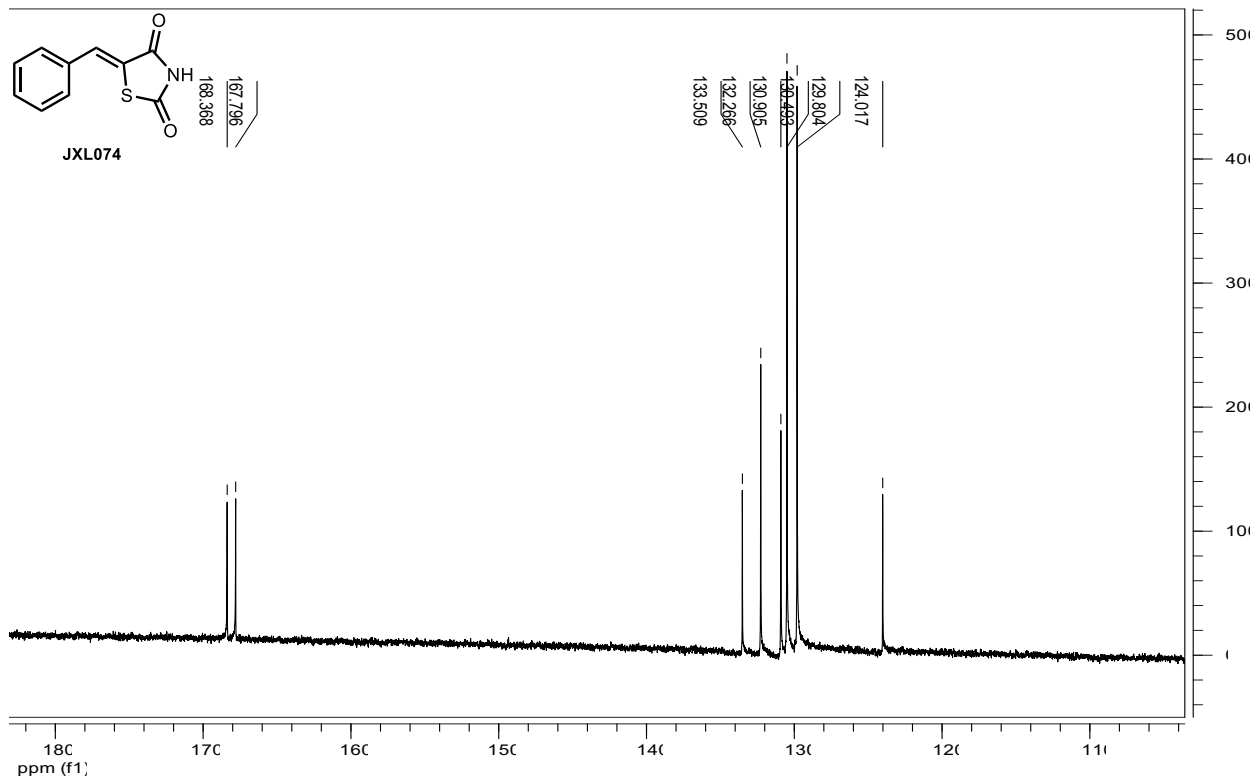

<sup>13</sup>C NMR (126 MHz, DMSO-d<sub>6</sub>)

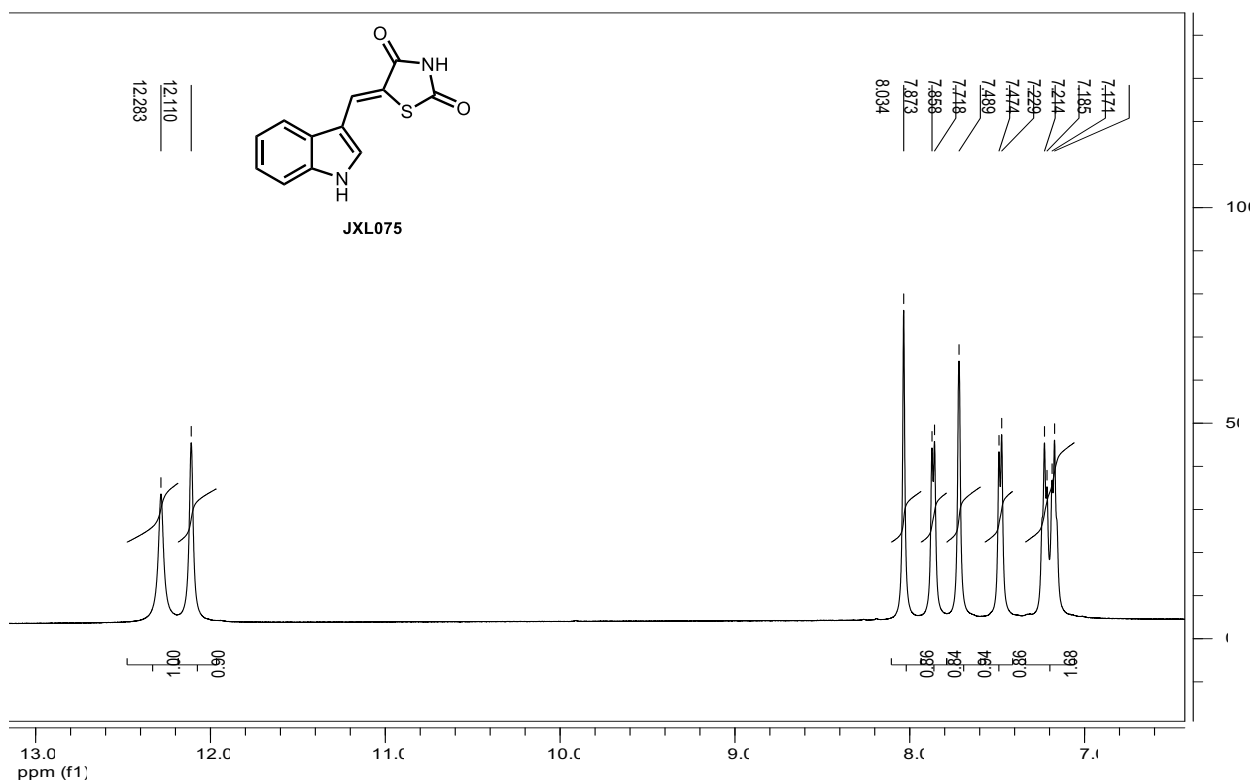

**<sup>1</sup>H NMR (500 MHz, DMSO-d<sub>6</sub>)**

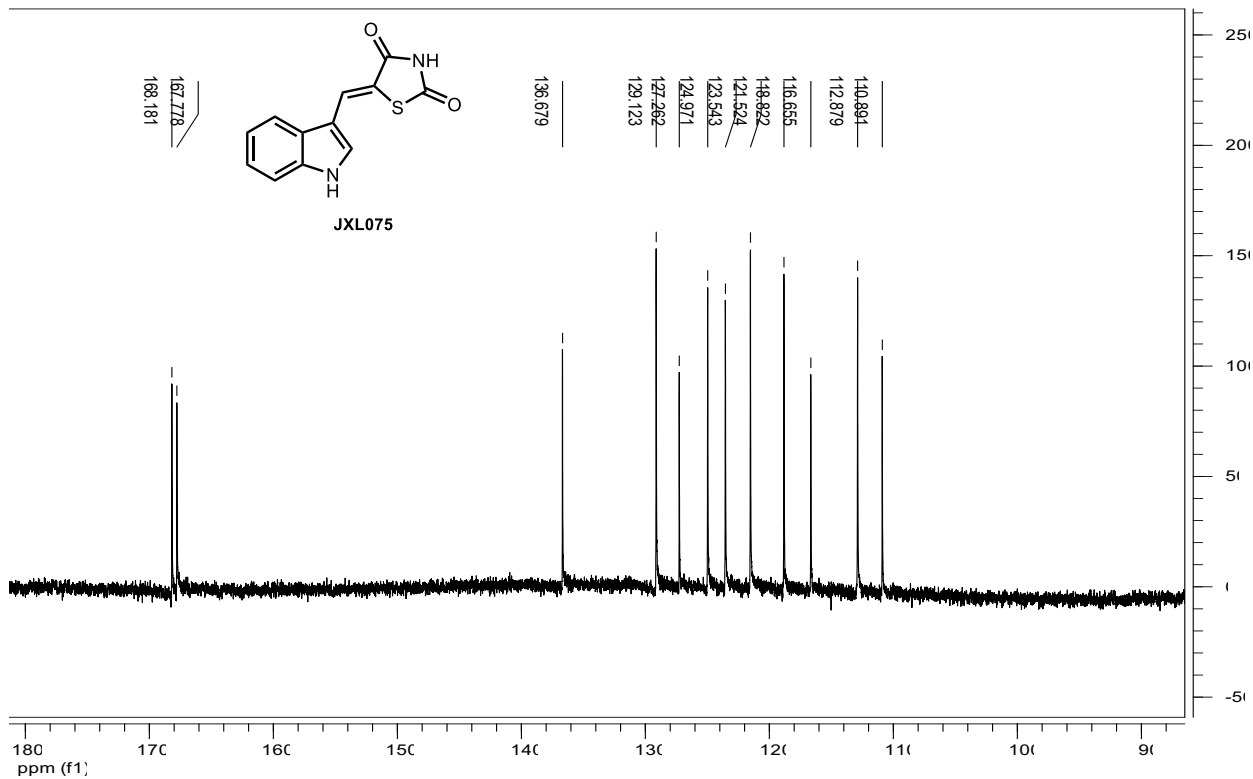

**<sup>13</sup>C NMR (126 MHz, DMSO-d<sub>6</sub>)**

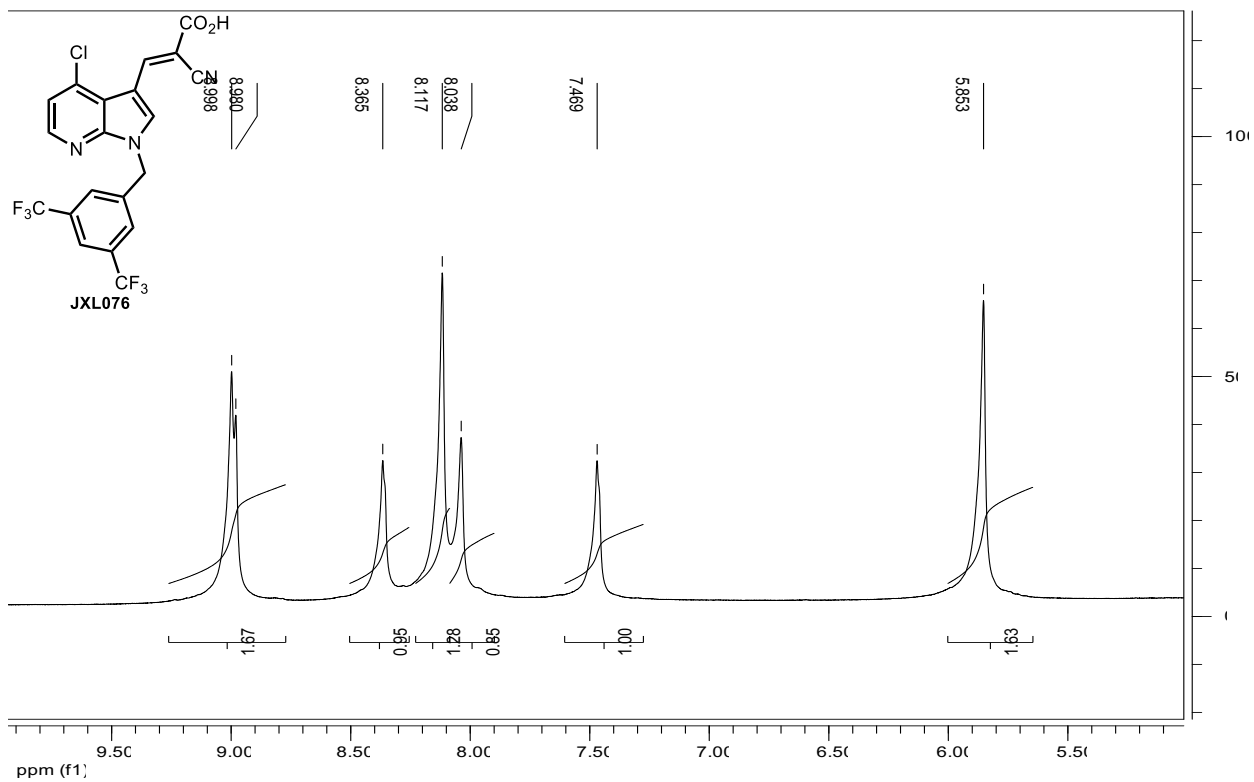

<sup>1</sup>H NMR (500 MHz, DMSO-d<sub>6</sub>)

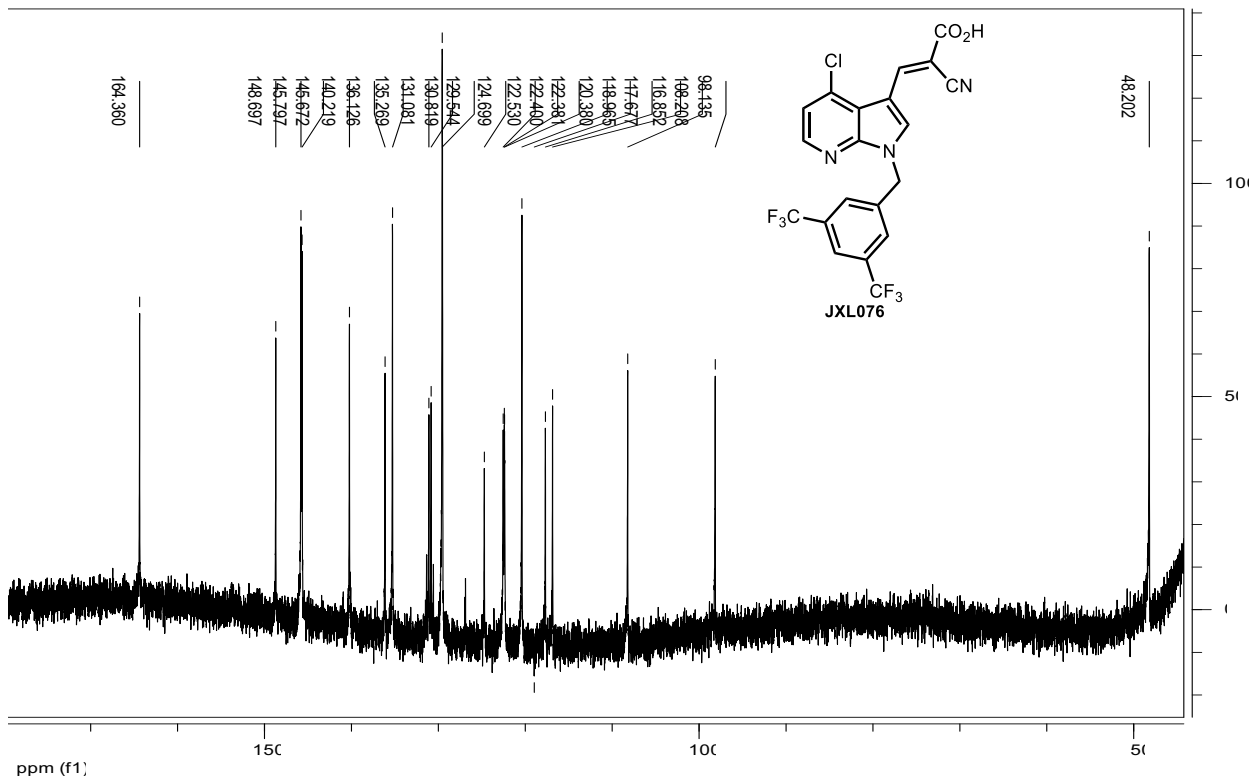

<sup>13</sup>C NMR (126 MHz, DMSO-d<sub>6</sub>)



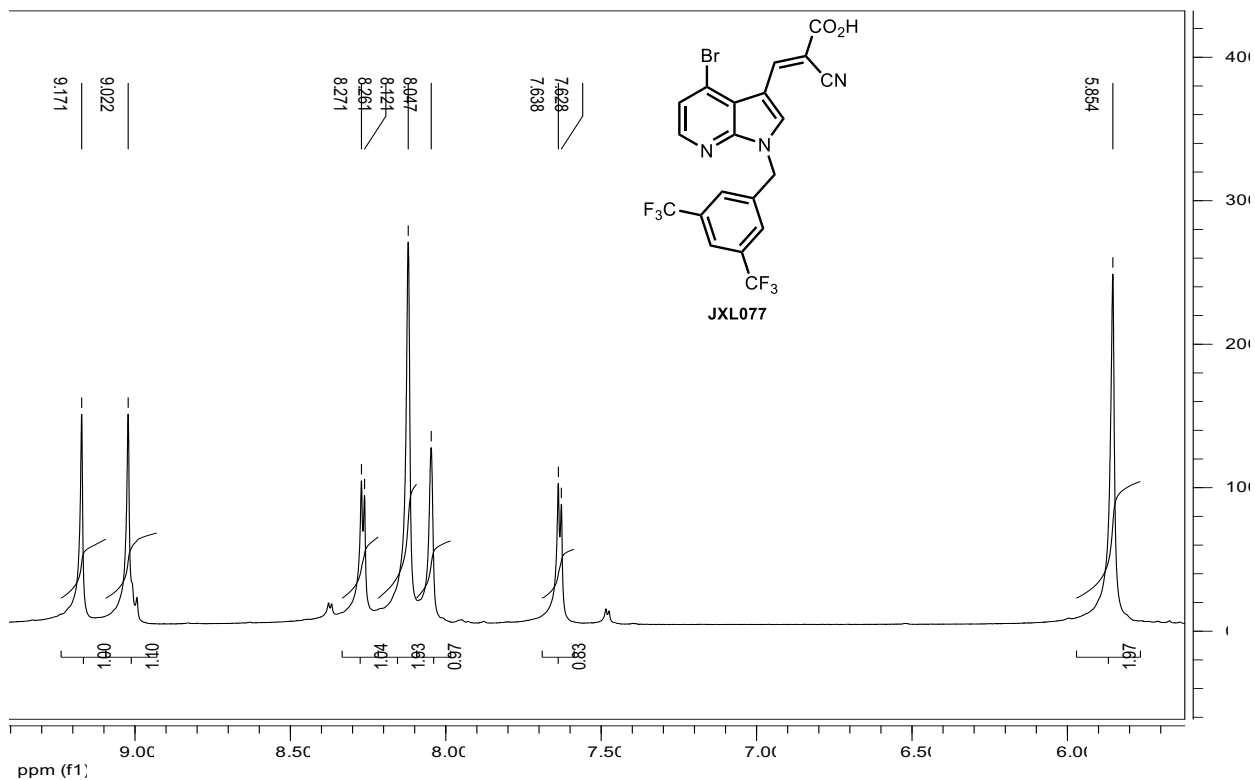

**<sup>1</sup>H NMR (500 MHz, DMSO-d<sub>6</sub>)**

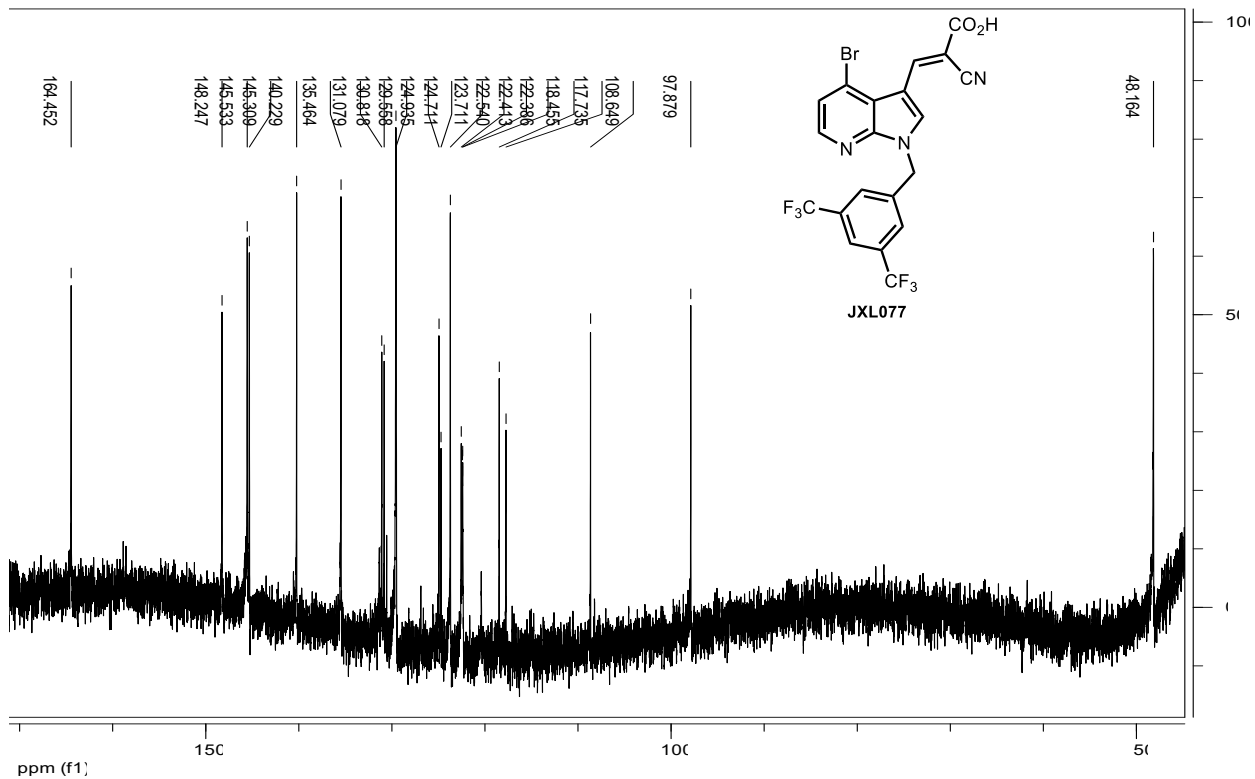

**<sup>13</sup>C NMR (126 MHz, DMSO-d<sub>6</sub>)**

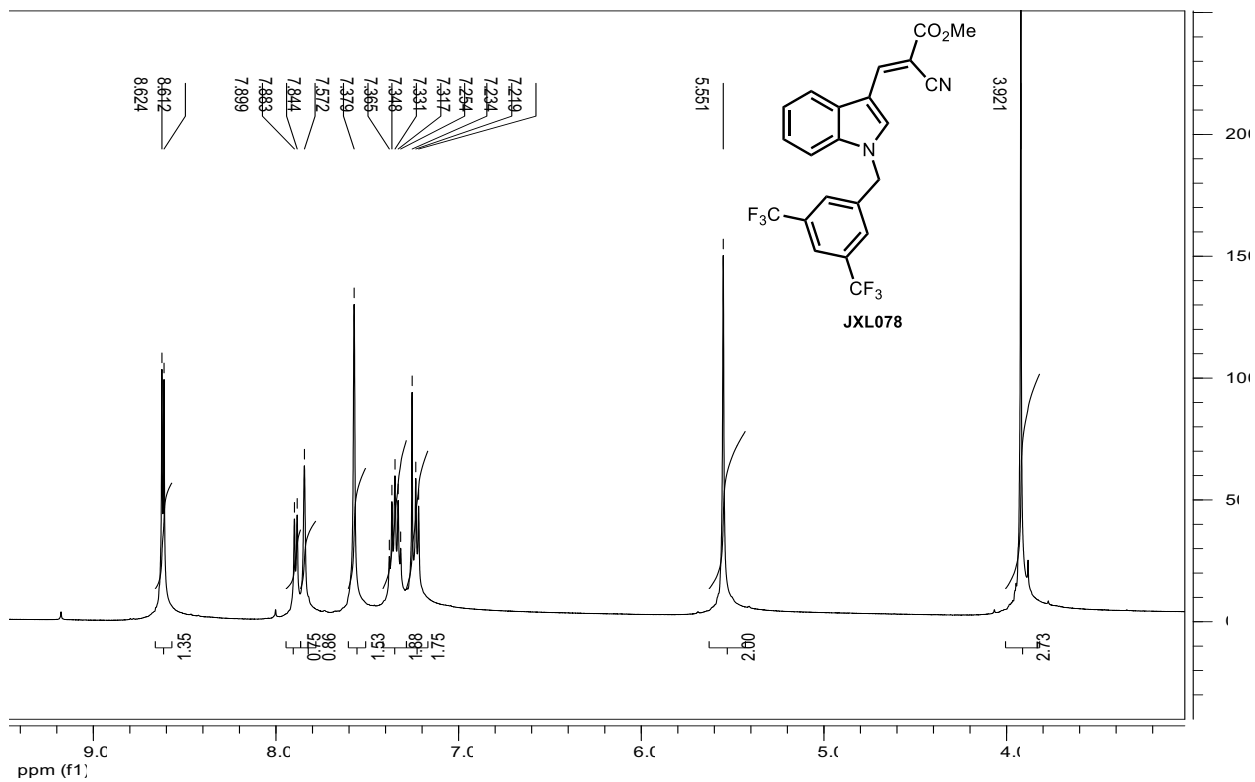

<sup>1</sup>H NMR (500 MHz, CDCl<sub>3</sub>)

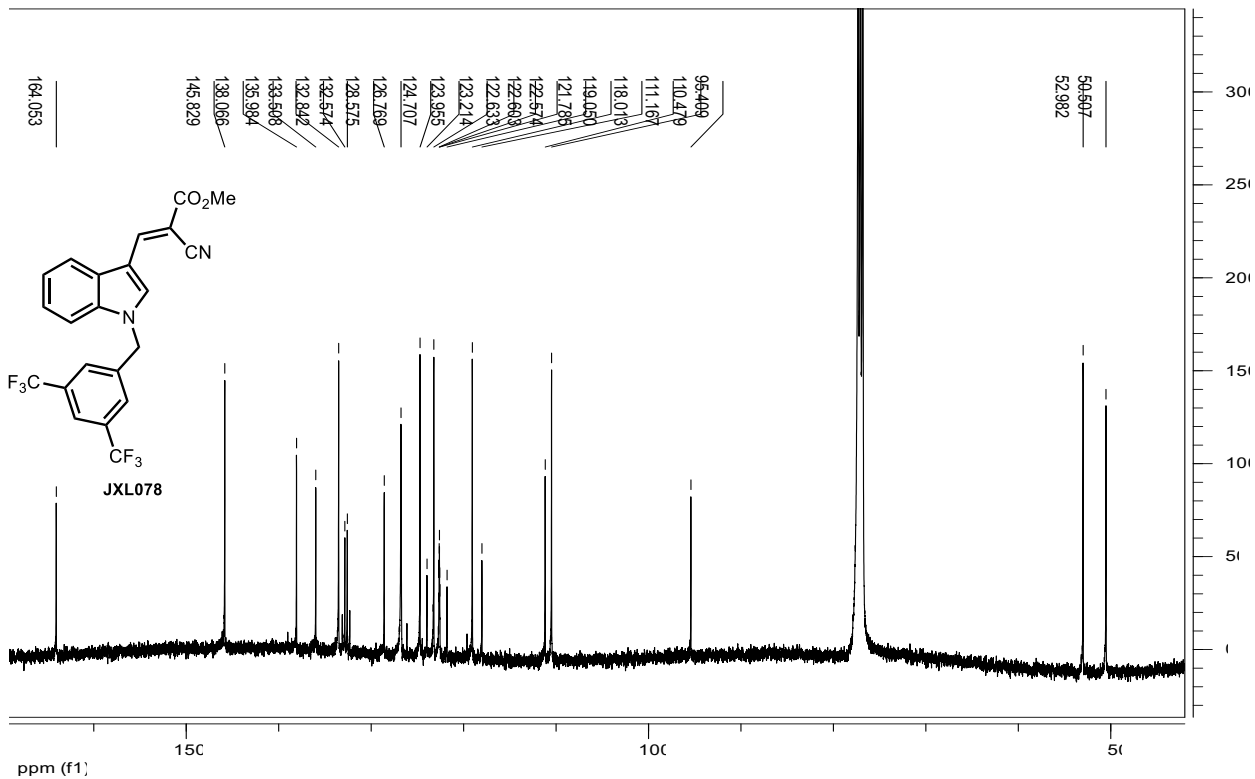

<sup>13</sup>C NMR (126 MHz, CDCl<sub>3</sub>)

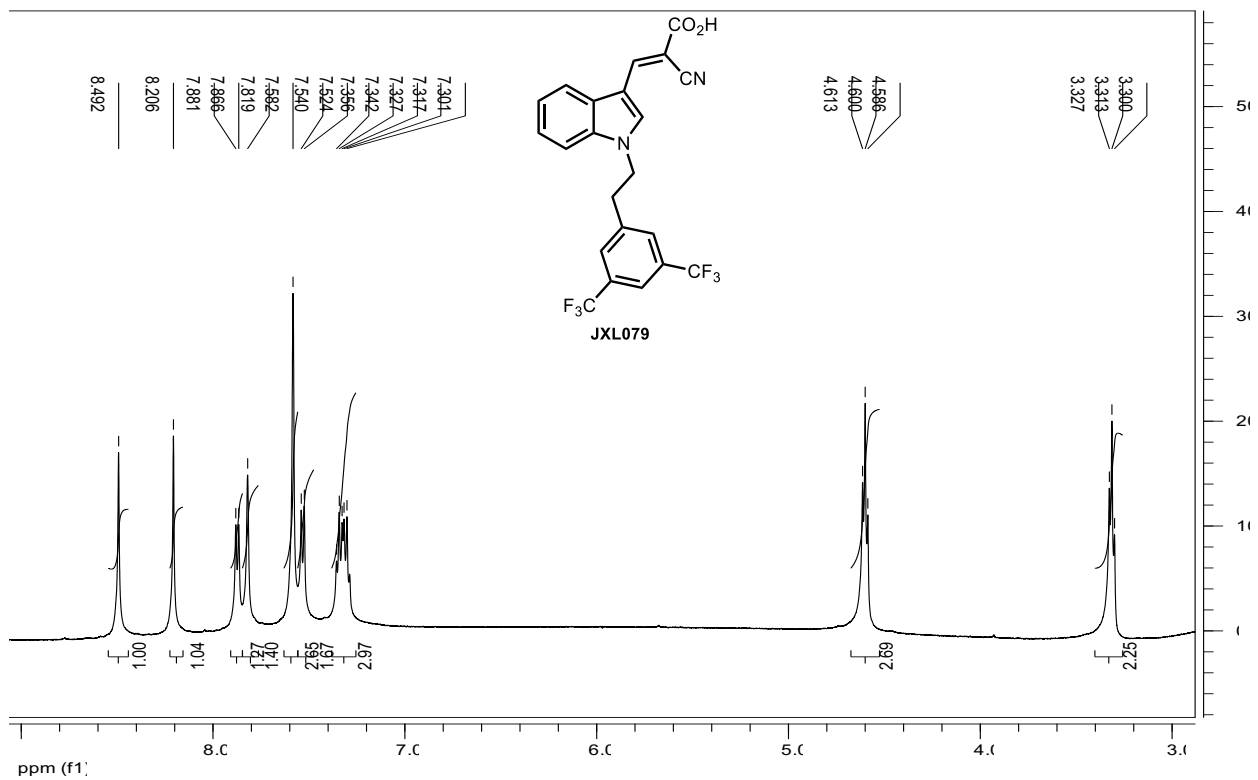

<sup>1</sup>H NMR (500 MHz, DMSO-d<sub>6</sub>)

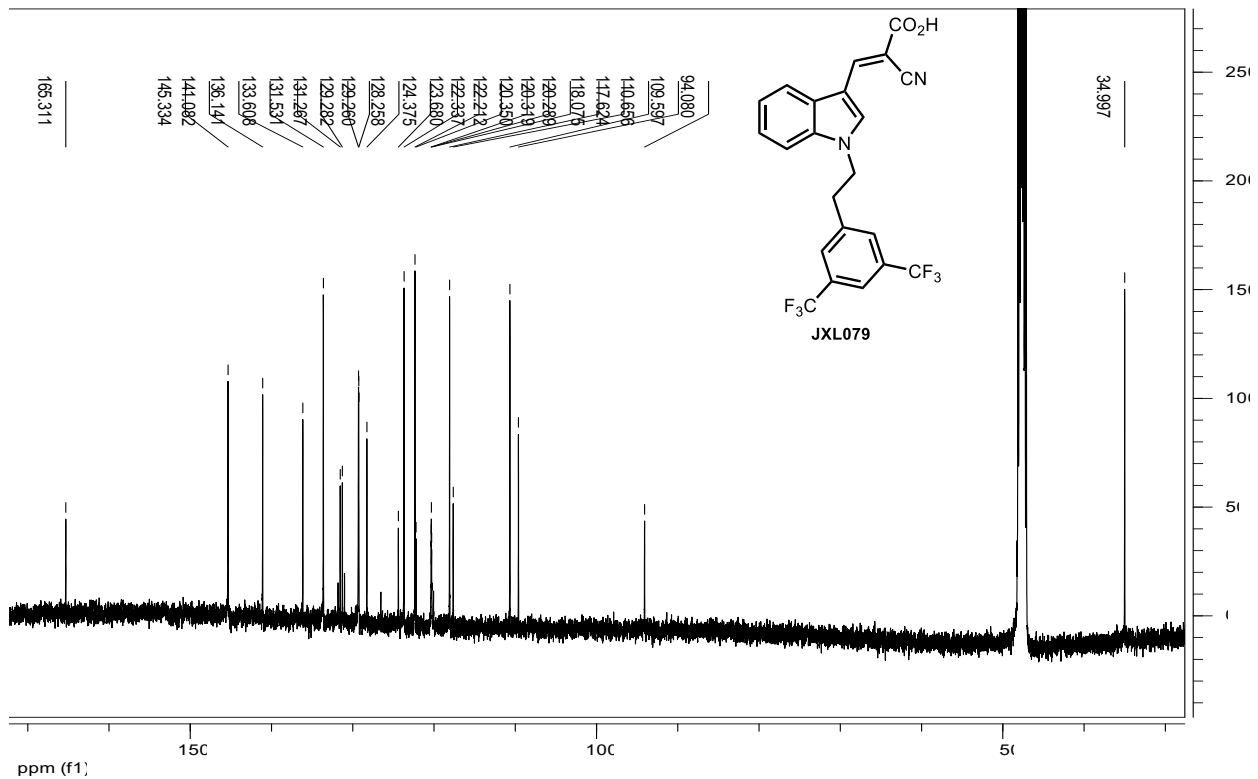

<sup>13</sup>C NMR (126 MHz, DMSO-d<sub>6</sub>)



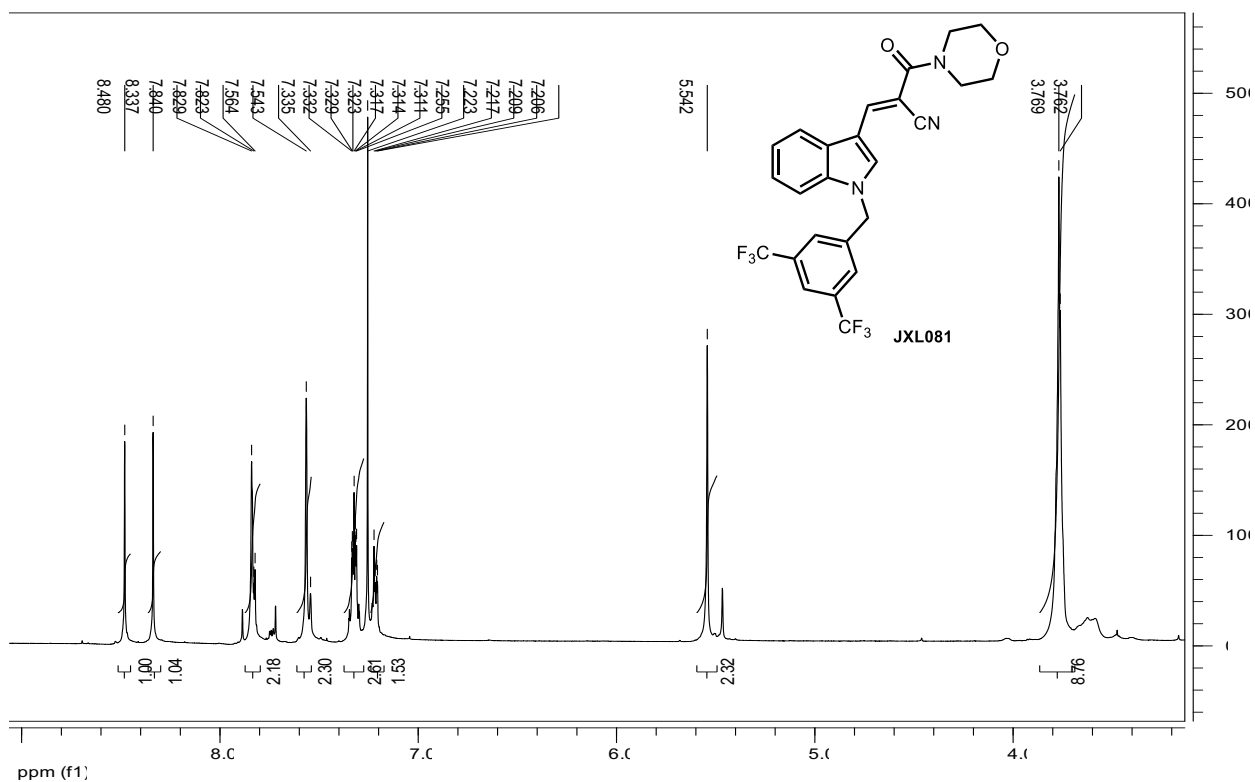

**<sup>1</sup>H NMR (500 MHz, CDCl<sub>3</sub>)**

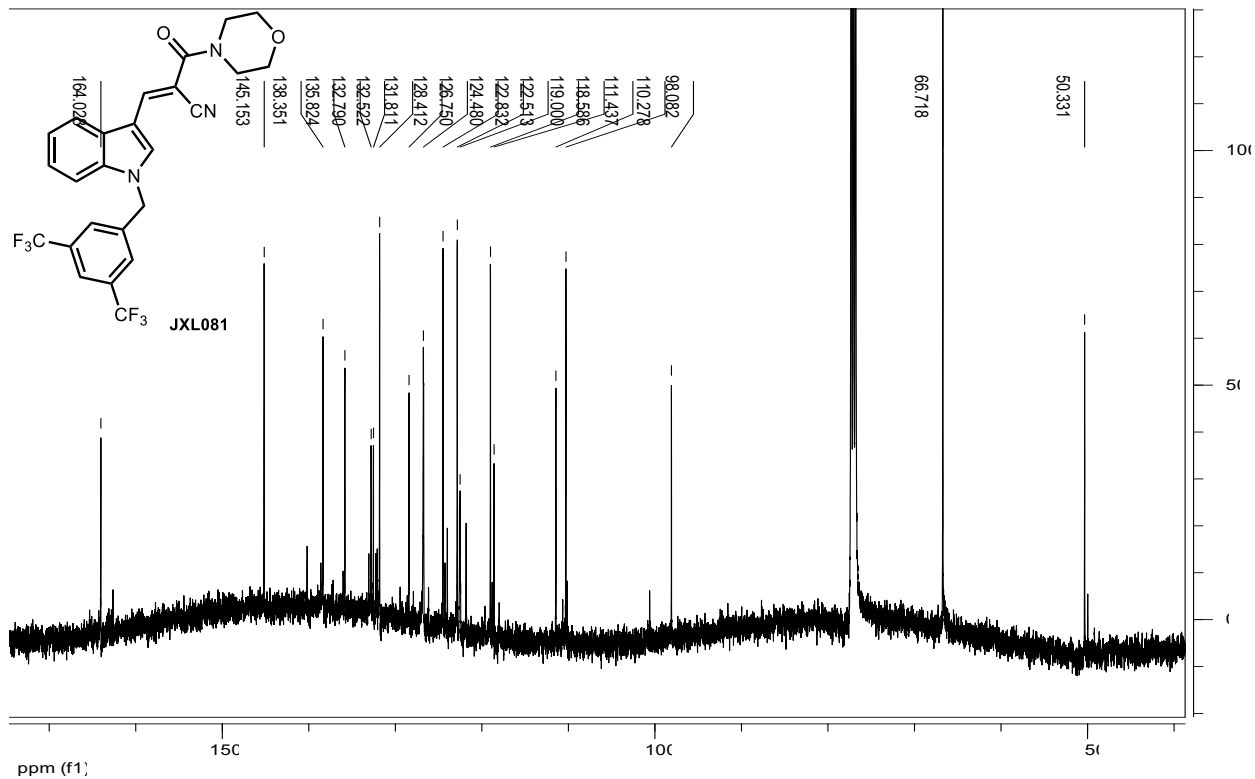

**<sup>13</sup>C NMR (126 MHz, CDCl<sub>3</sub>)**

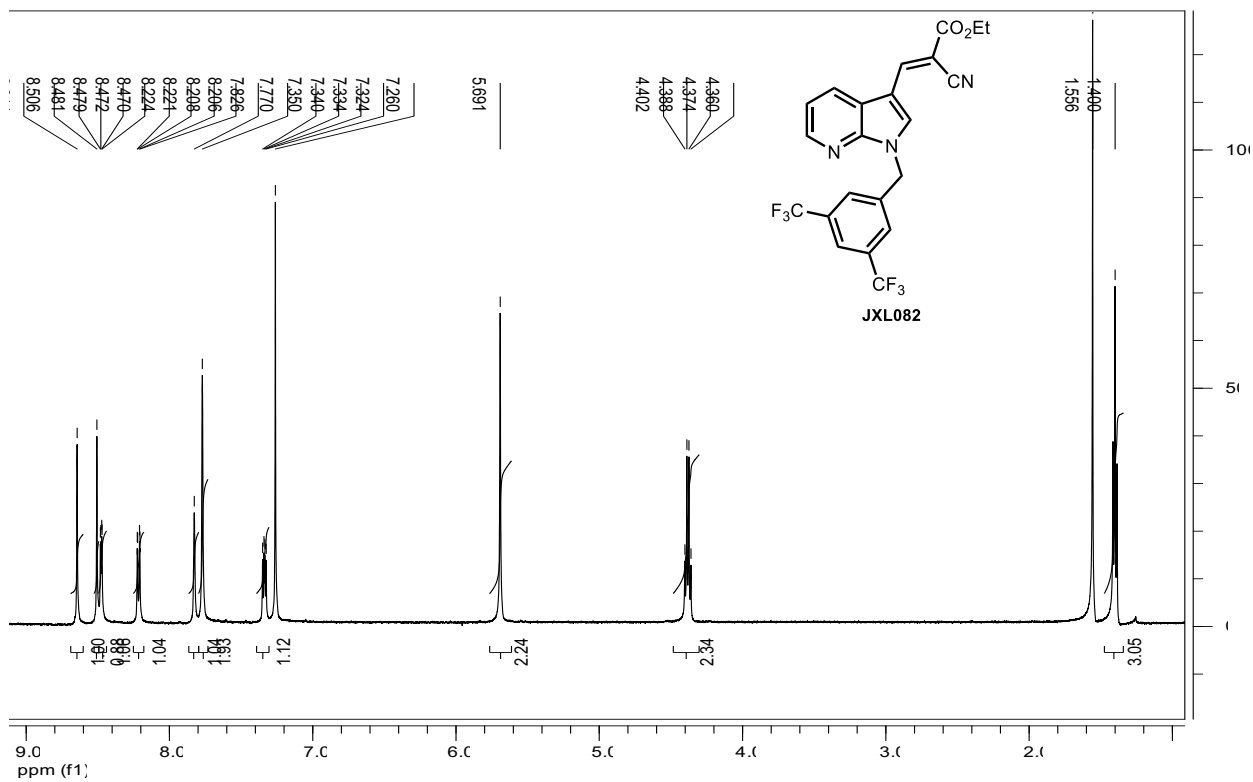

<sup>1</sup>H NMR (500 MHz, CDCl<sub>3</sub>)

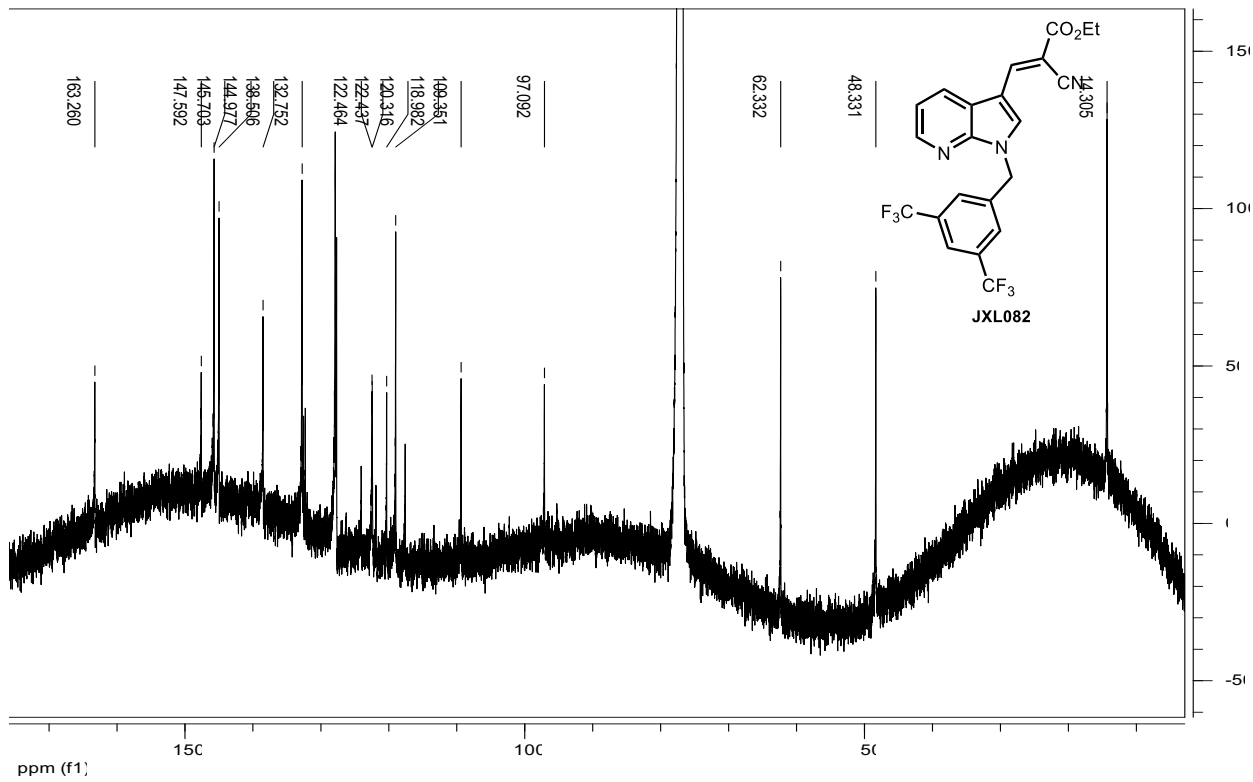

<sup>13</sup>C NMR (126 MHz, CDCl<sub>3</sub>)

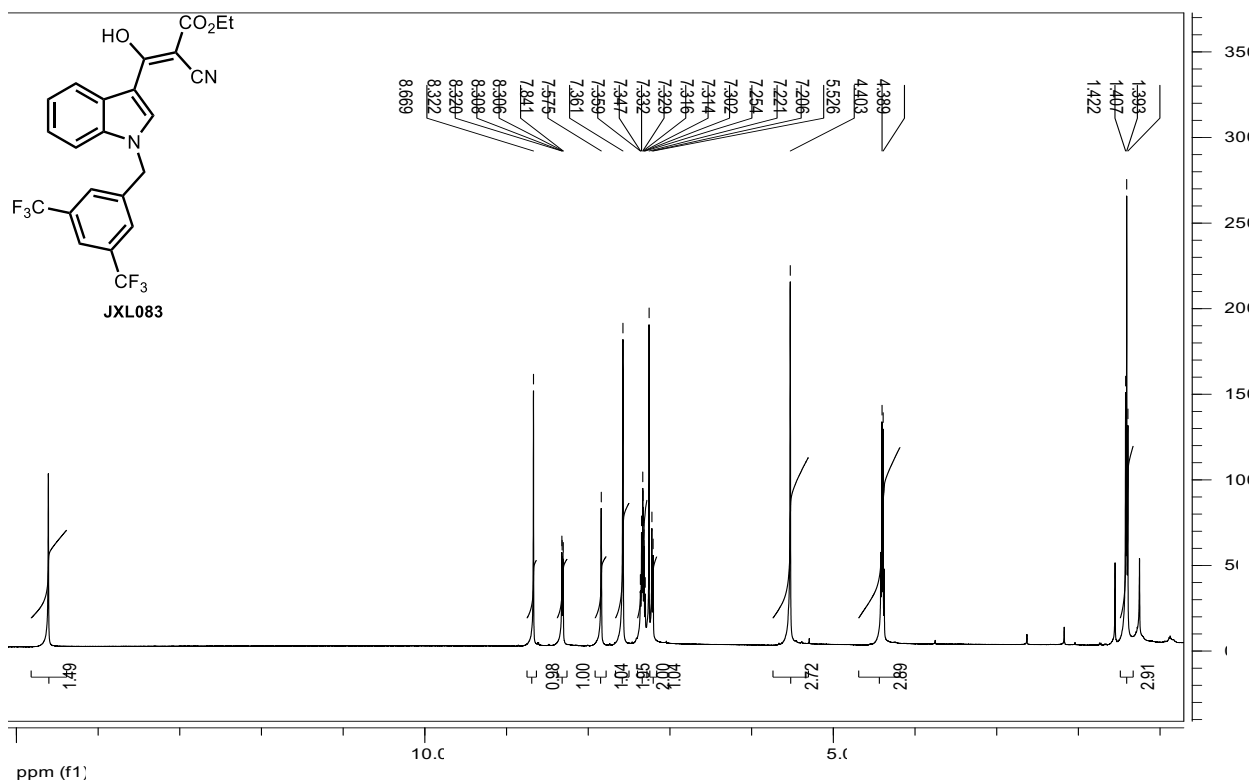

<sup>1</sup>H NMR (500 MHz, CDCl<sub>3</sub>)

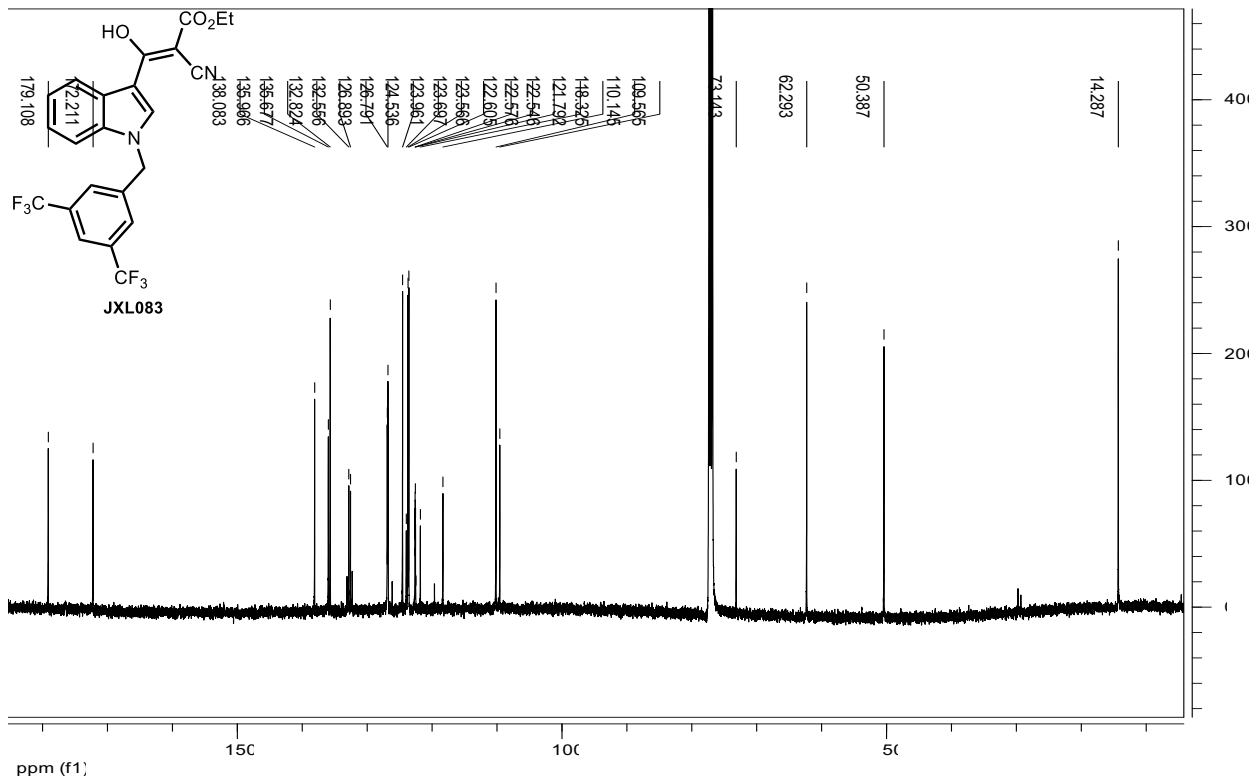

<sup>13</sup>C NMR (126 MHz, CDCl<sub>3</sub>)

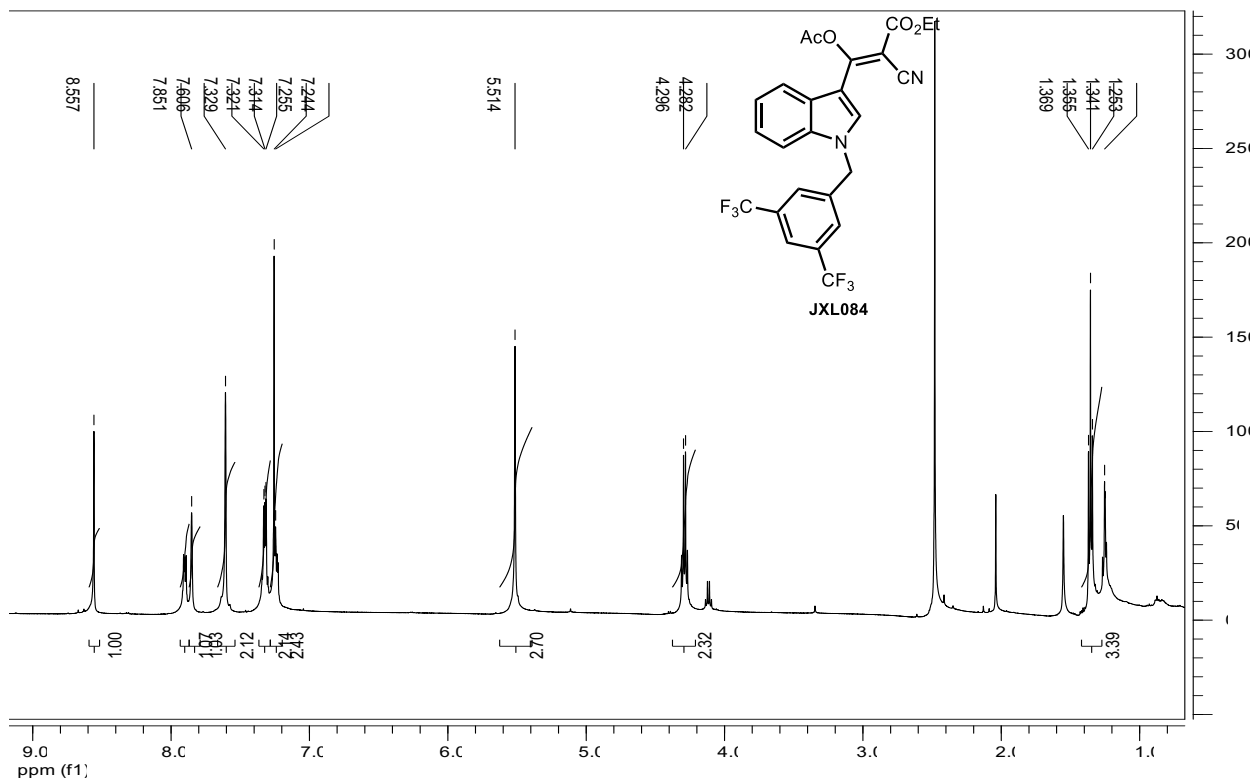

<sup>1</sup>H NMR (500 MHz, CDCl<sub>3</sub>)

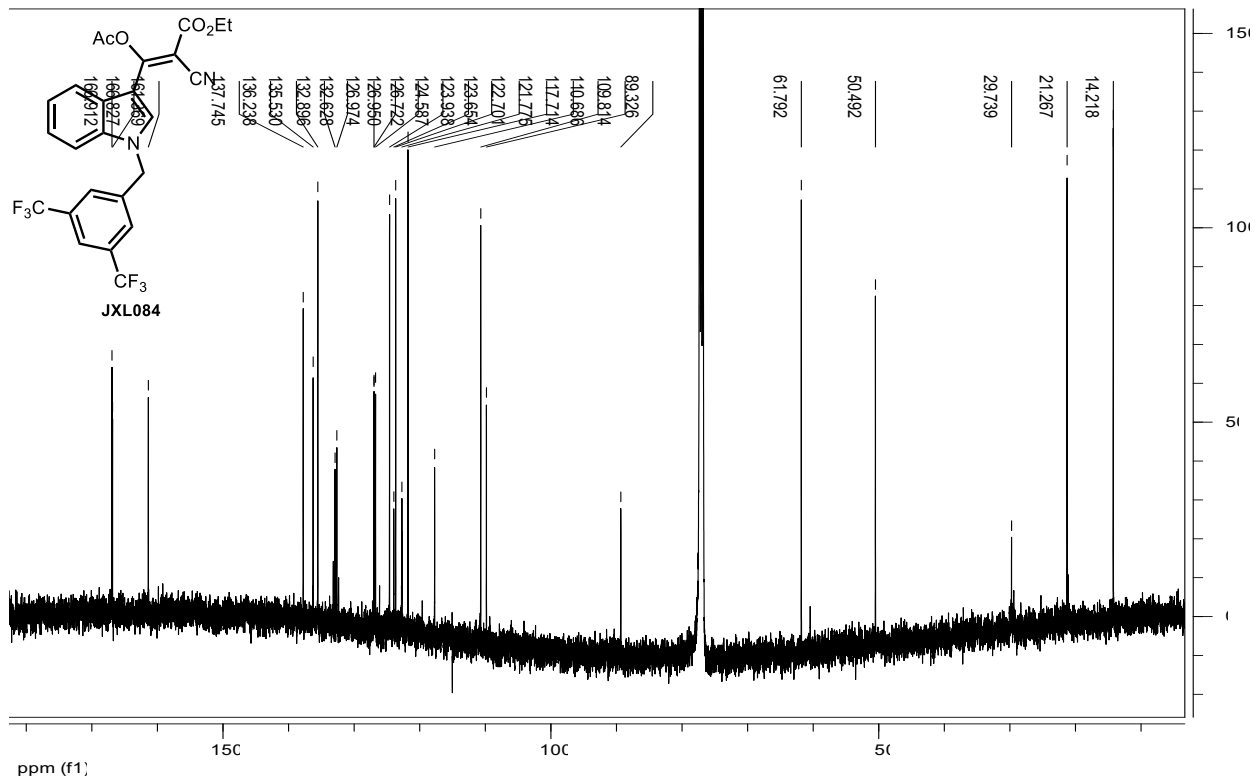

<sup>13</sup>C NMR (126 MHz, CDCl<sub>3</sub>)





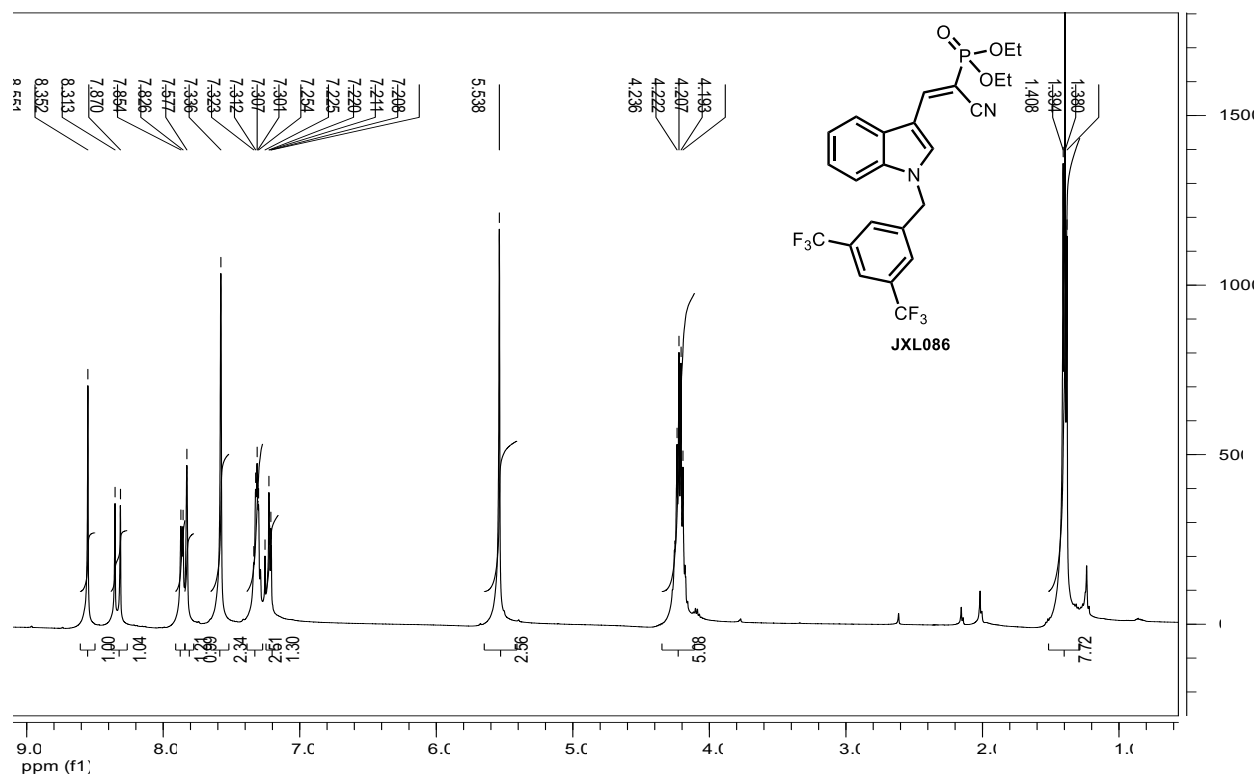

**<sup>1</sup>H NMR (500 MHz, CDCl<sub>3</sub>)**

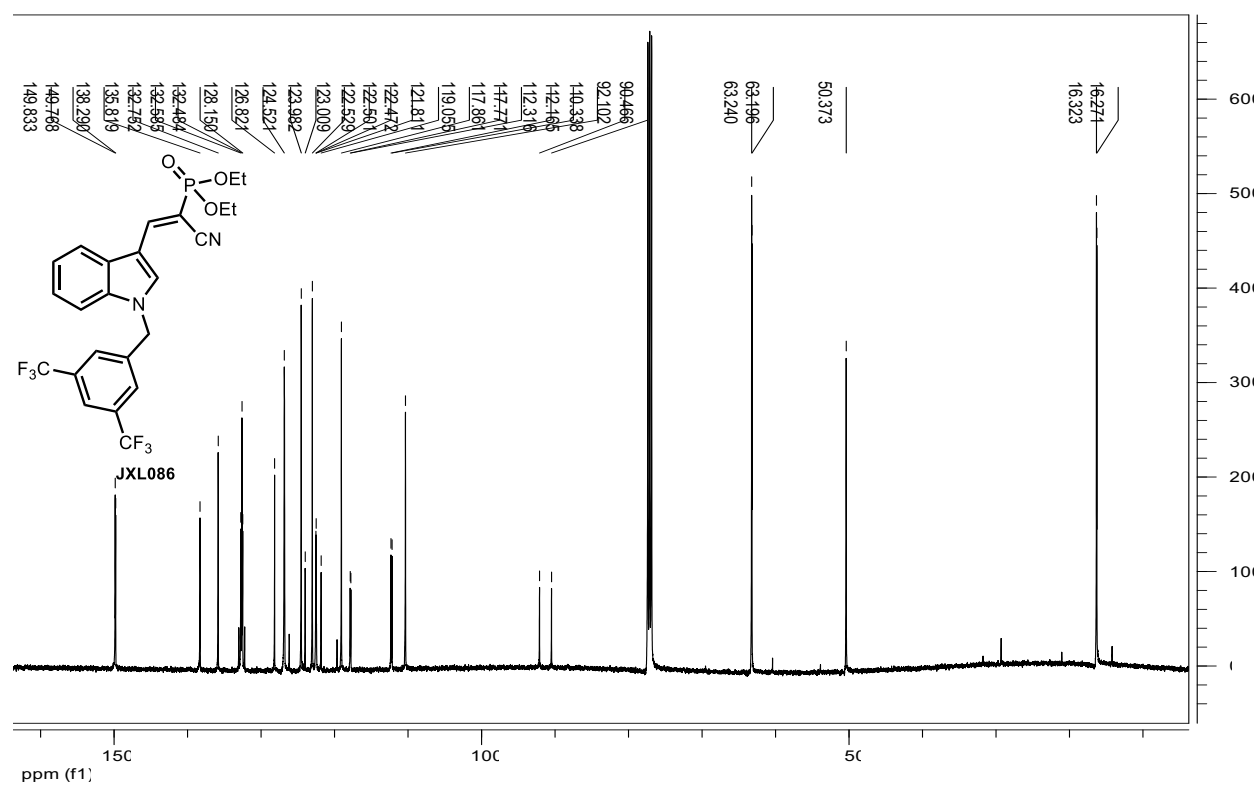

**<sup>13</sup>C NMR (126 MHz, CDCl<sub>3</sub>)**

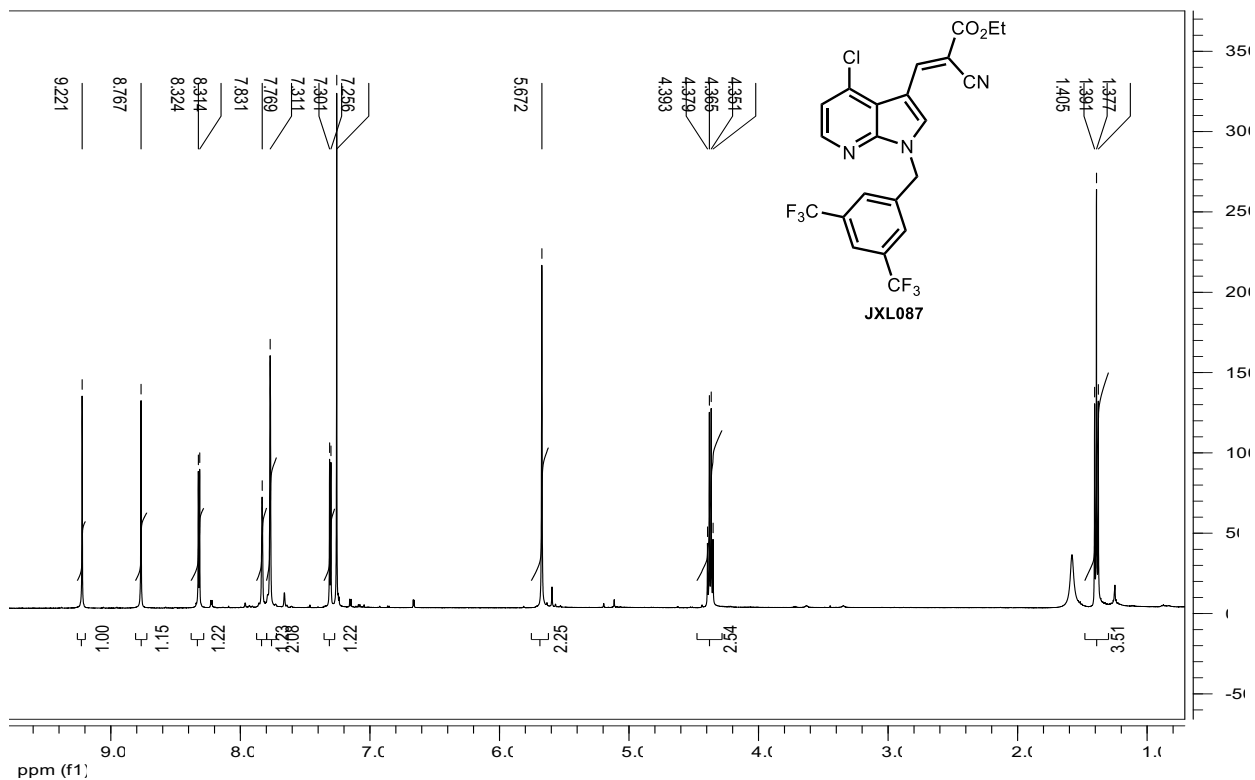

<sup>1</sup>H NMR (500 MHz, CDCl<sub>3</sub>)

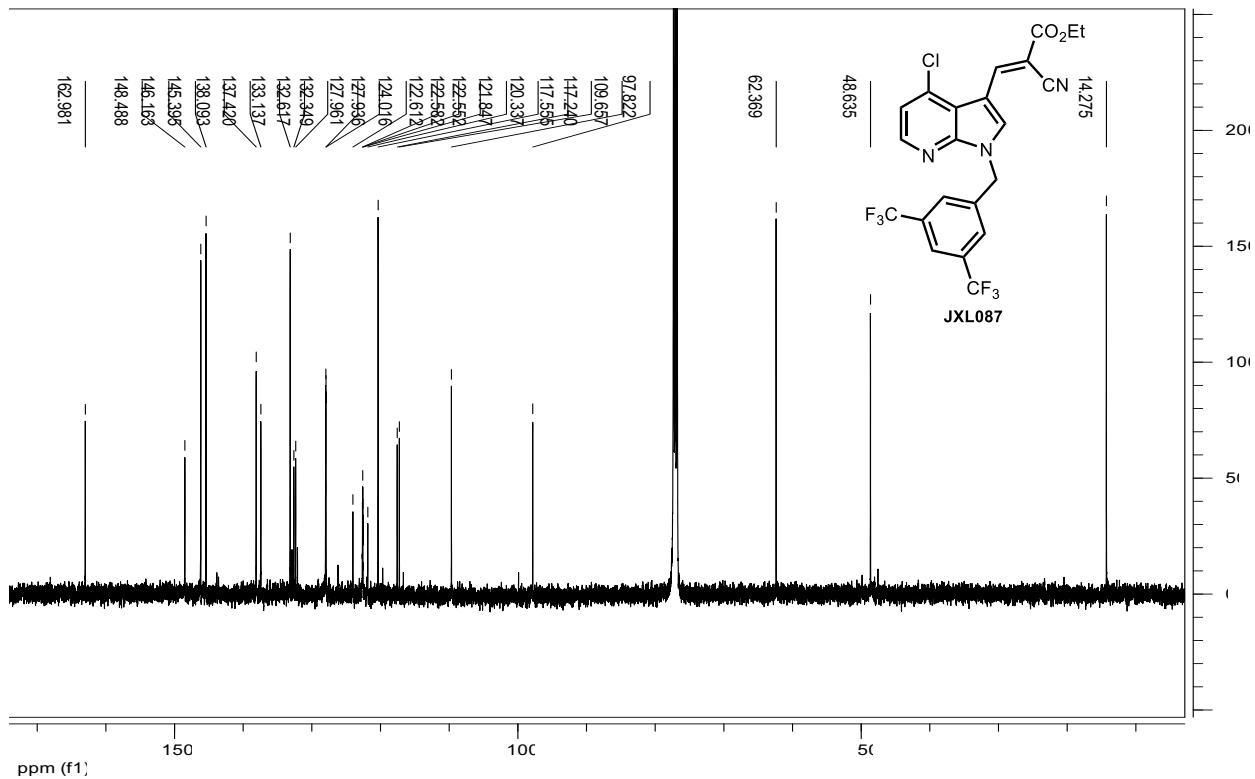

<sup>13</sup>C NMR (126 MHz, CDCl<sub>3</sub>)

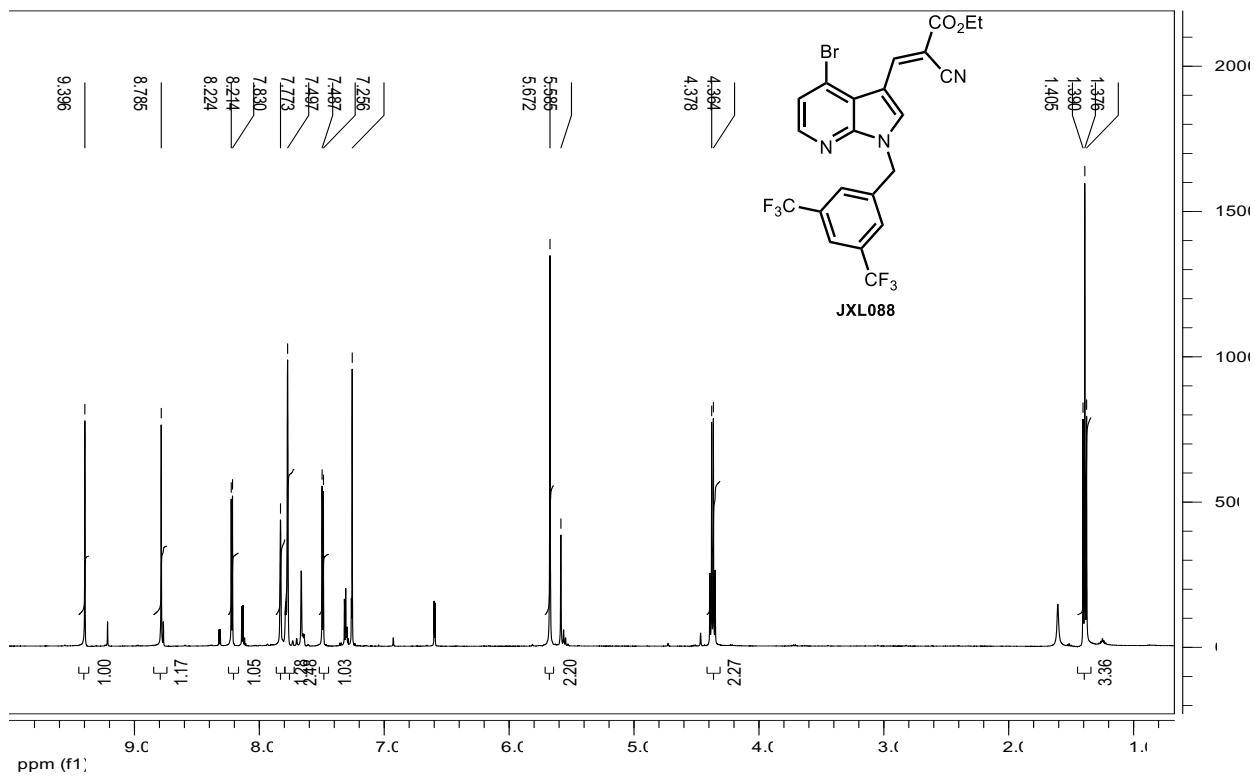

<sup>1</sup>H NMR (500 MHz, CDCl<sub>3</sub>)

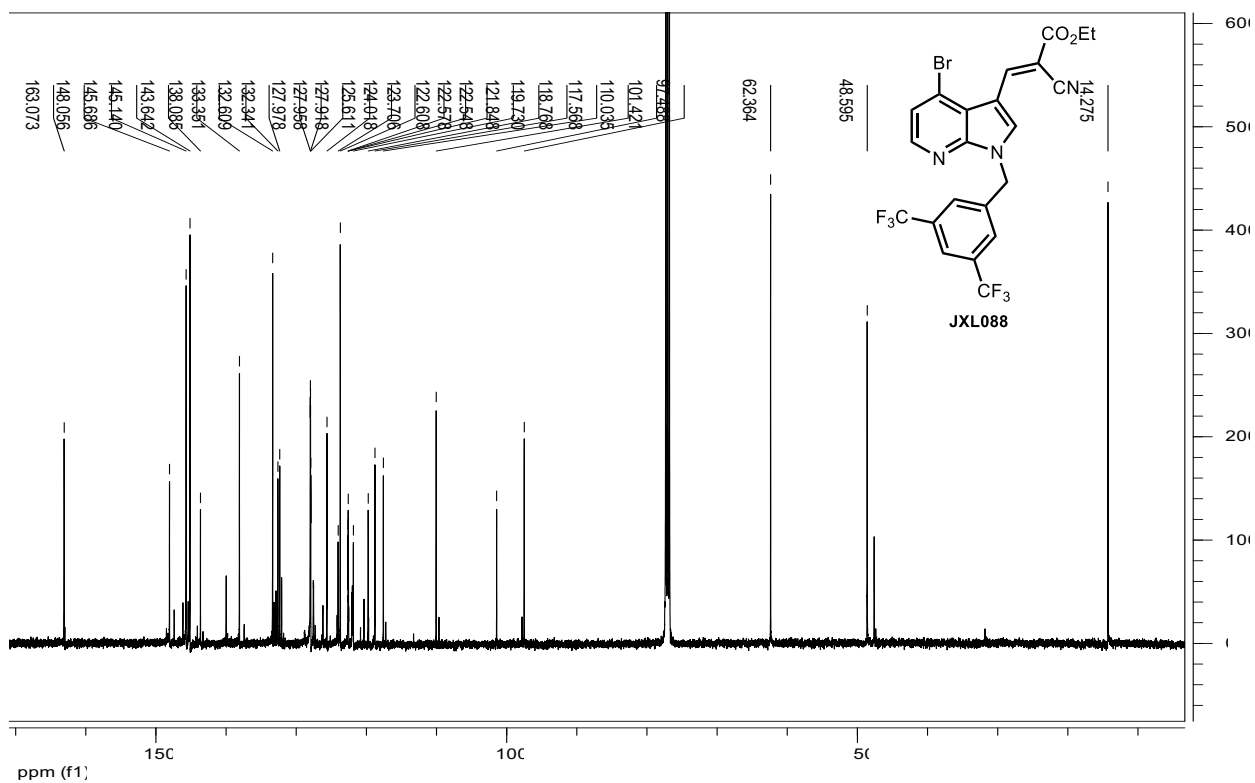

<sup>13</sup>C NMR (126 MHz, CDCl<sub>3</sub>)

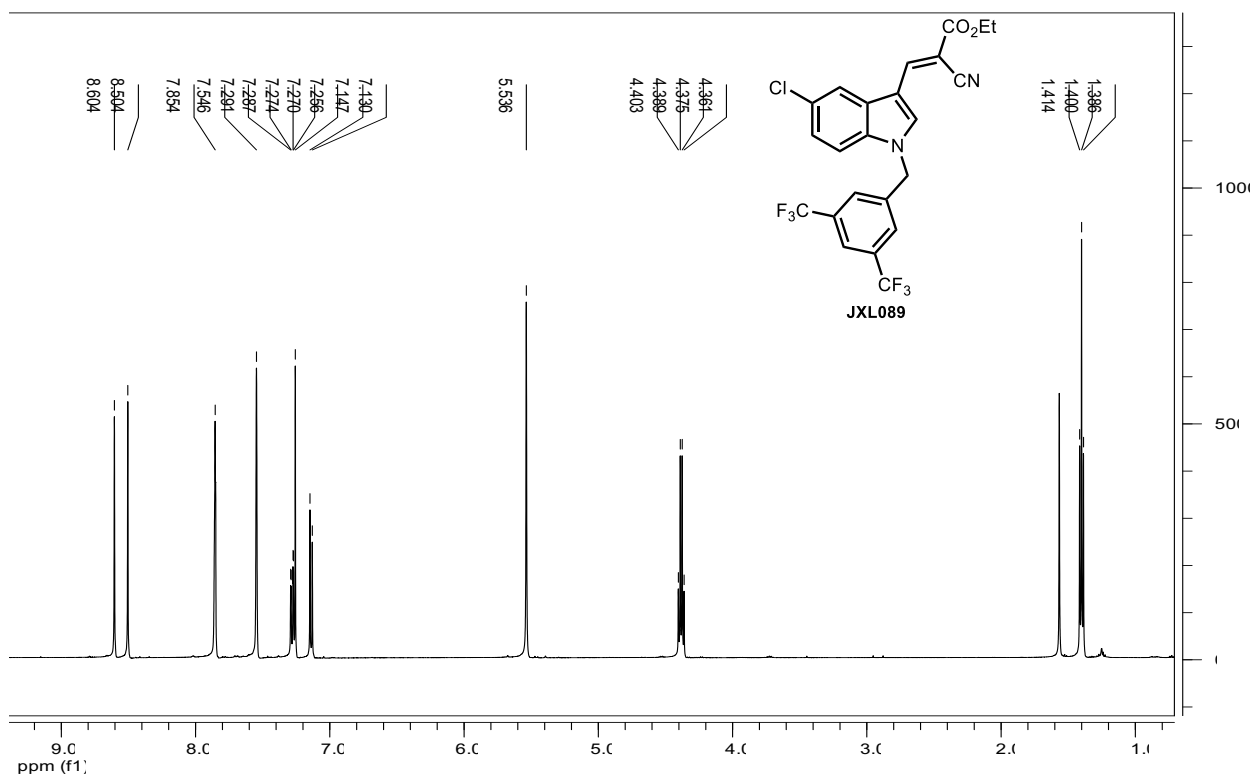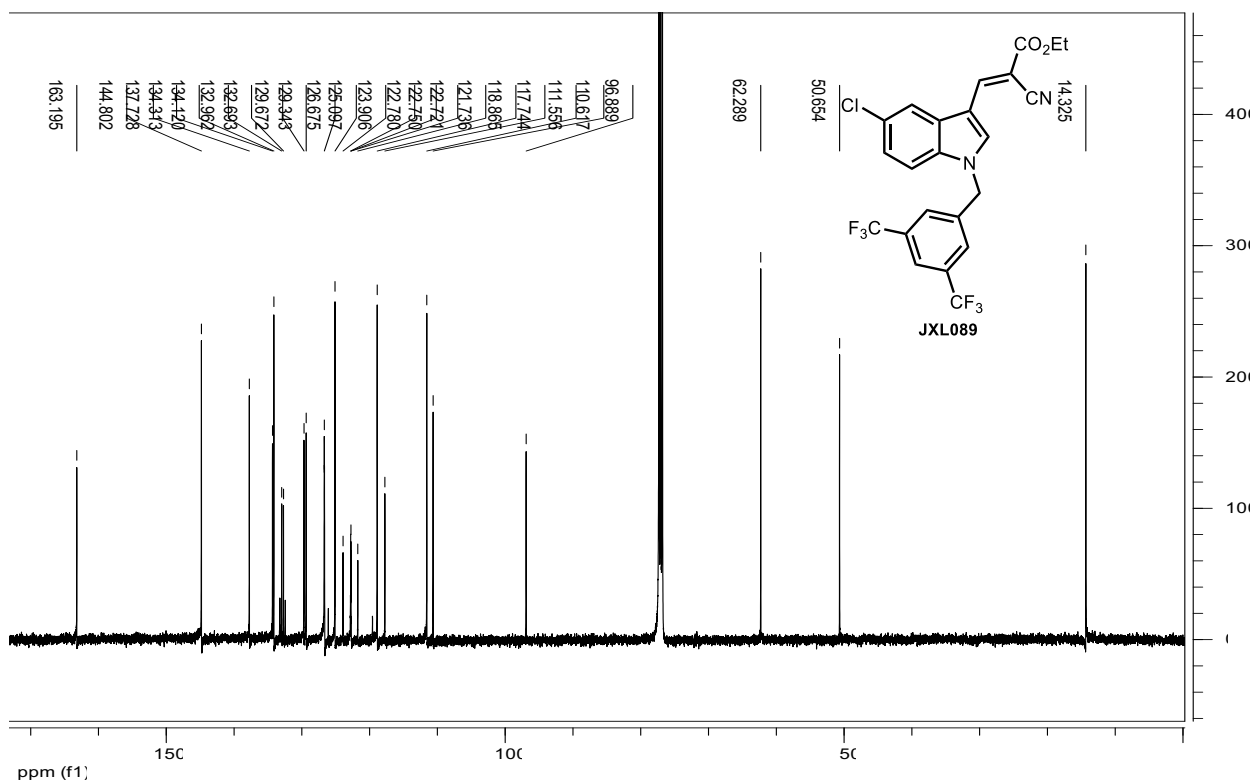

**<sup>13</sup>C NMR (126 MHz, CDCl<sub>3</sub>)**

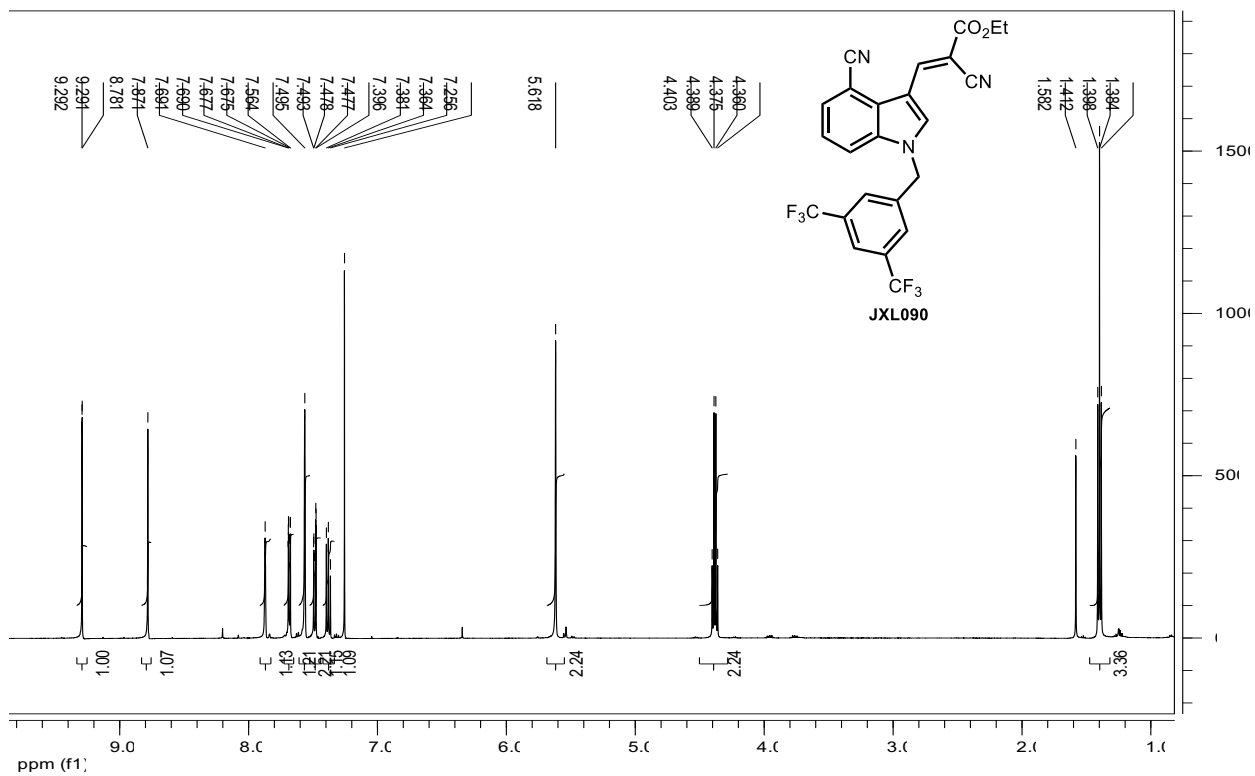

**<sup>1</sup>H NMR (500 MHz, CDCl<sub>3</sub>)**

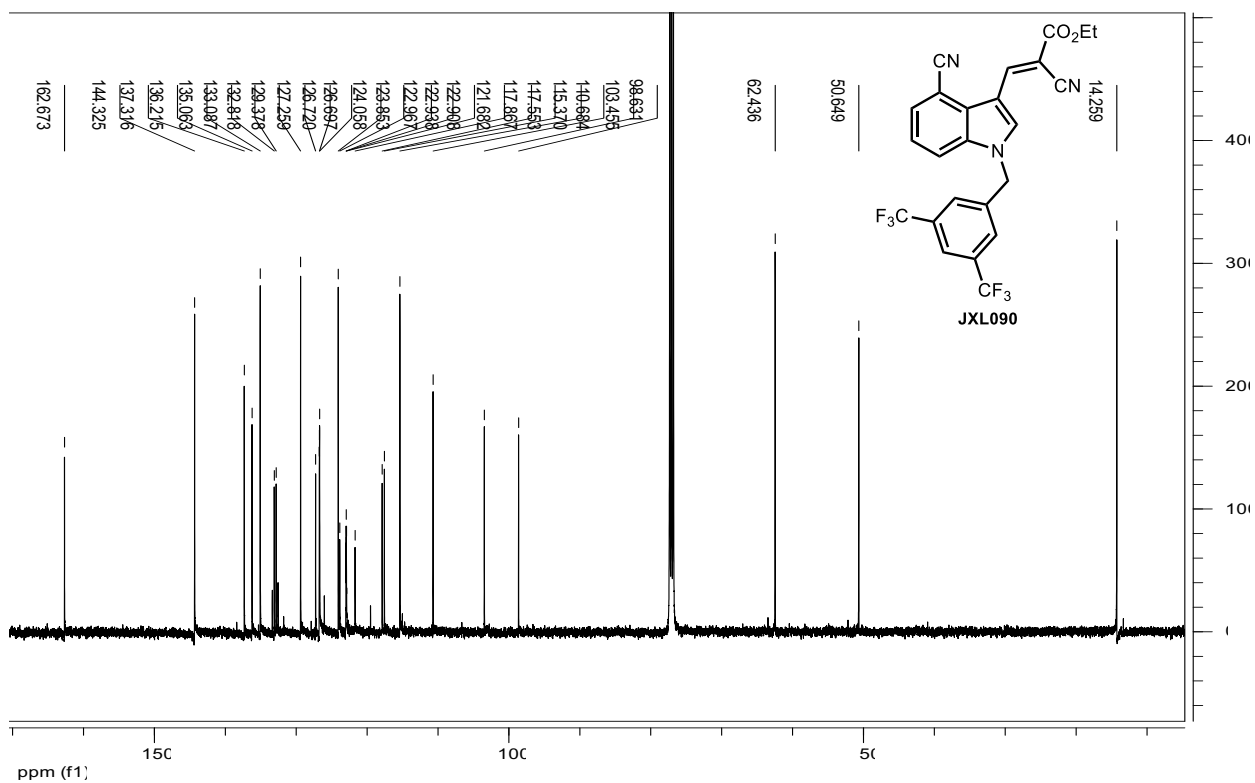

**<sup>13</sup>C NMR (126 MHz, CDCl<sub>3</sub>)**

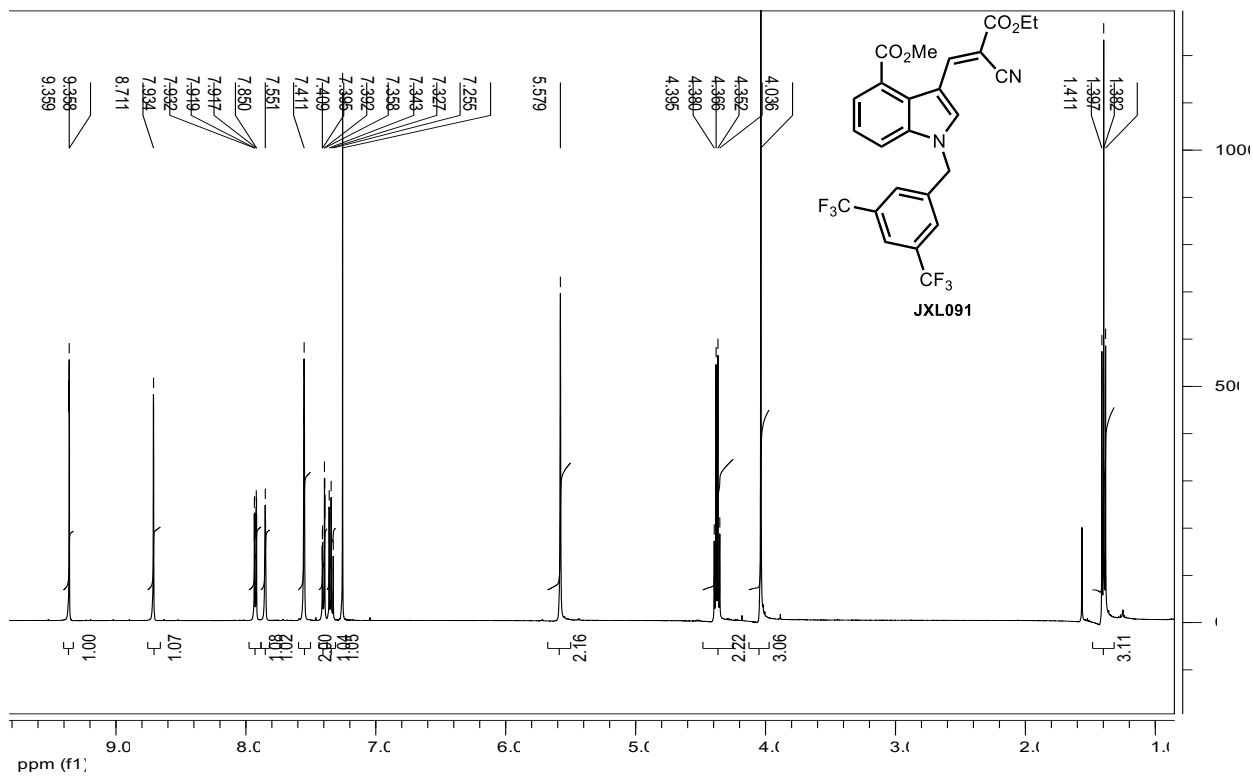

**<sup>1</sup>H NMR (500 MHz, CDCl<sub>3</sub>)**

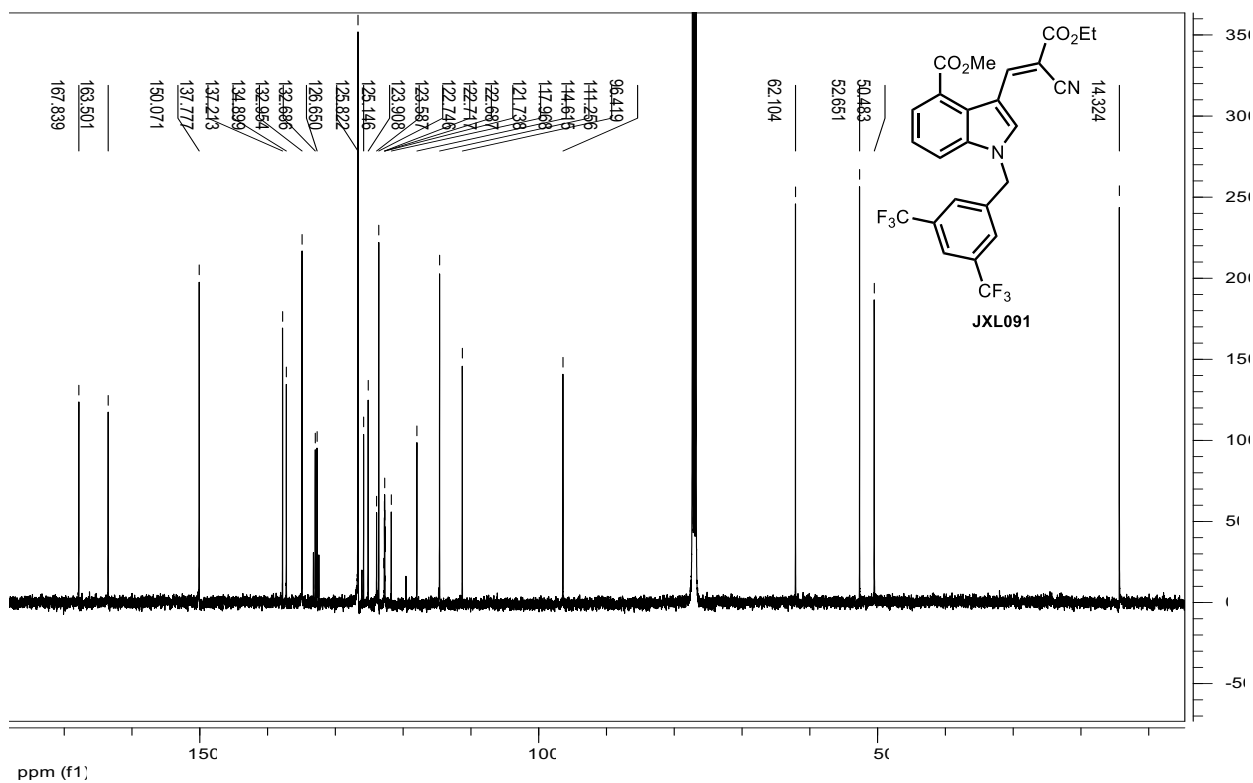

**<sup>13</sup>C NMR (126 MHz, CDCl<sub>3</sub>)**

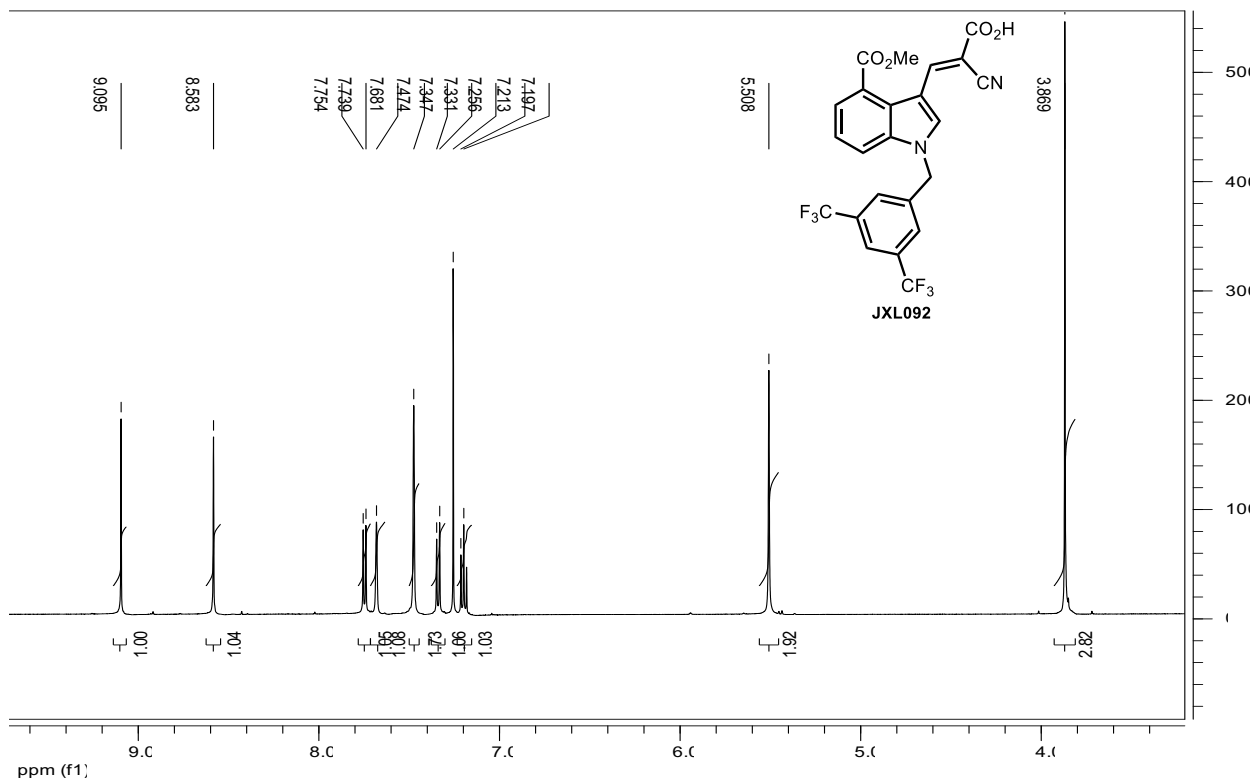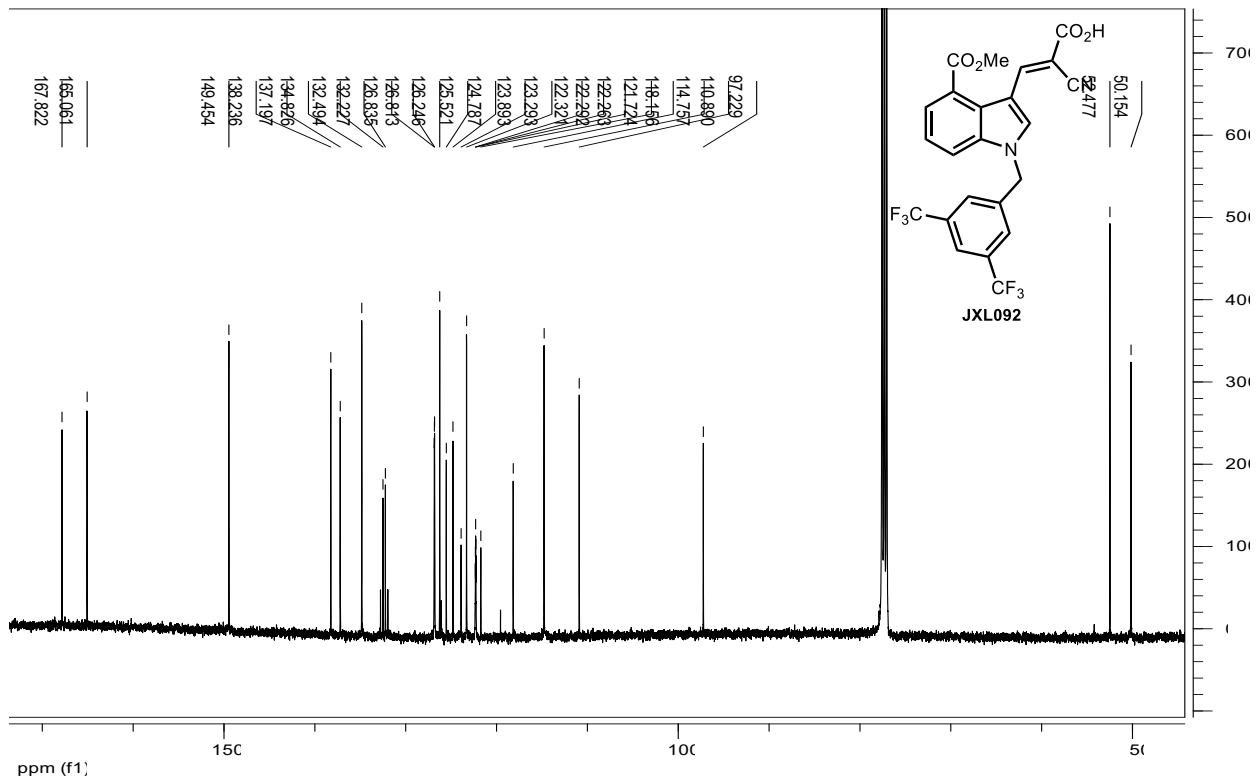





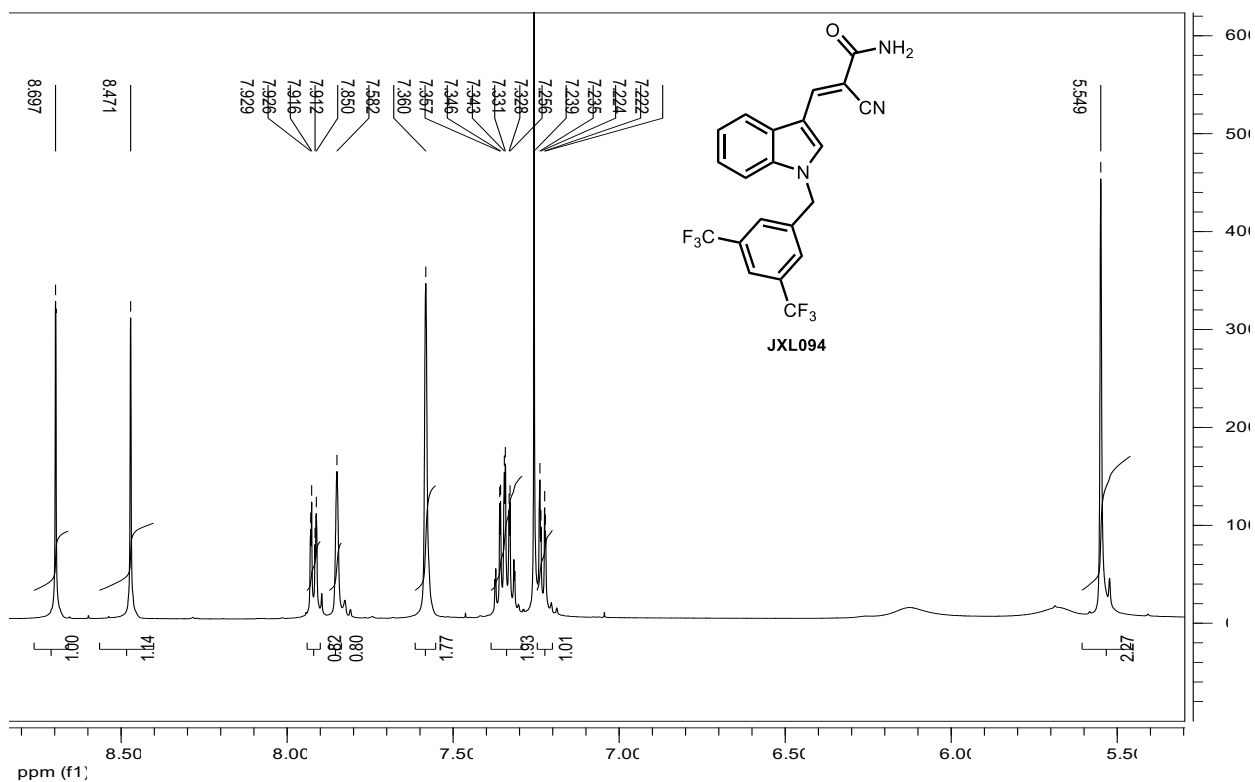

<sup>1</sup>H NMR (500 MHz, CDCl<sub>3</sub>)

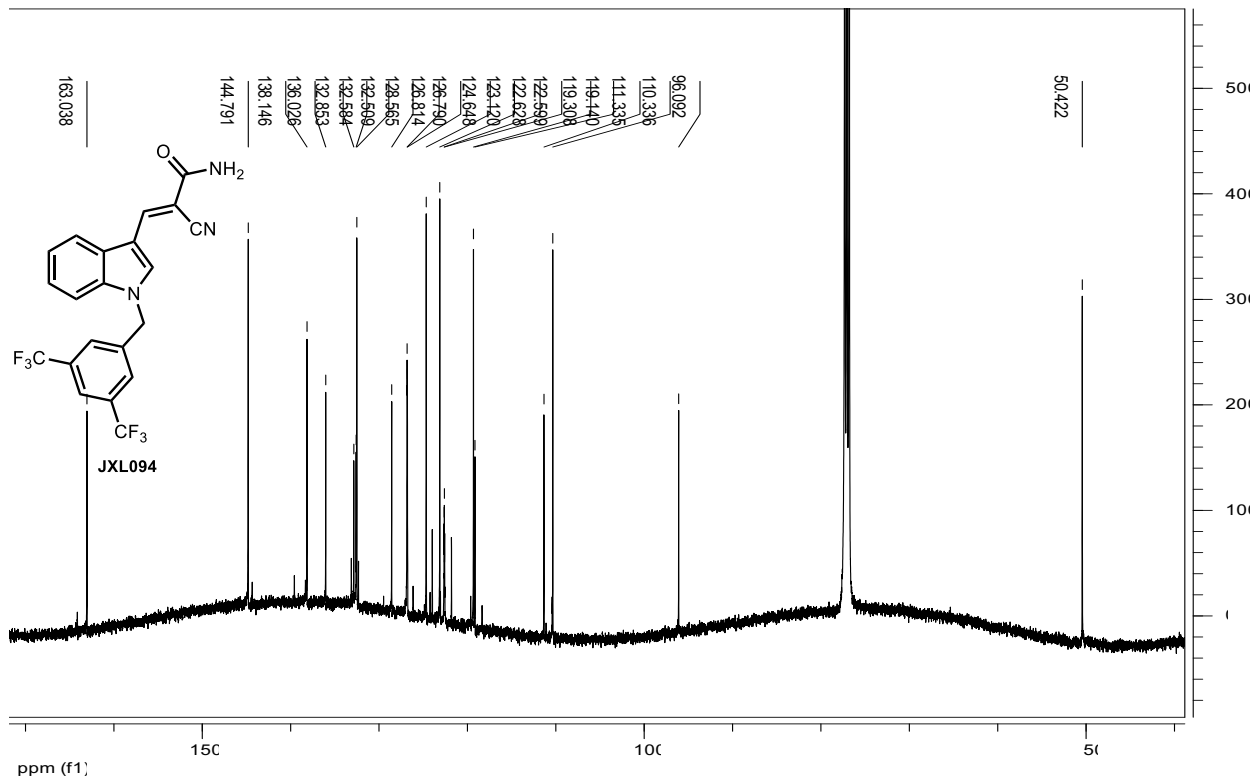

<sup>13</sup>C NMR (126 MHz, CDCl<sub>3</sub>)

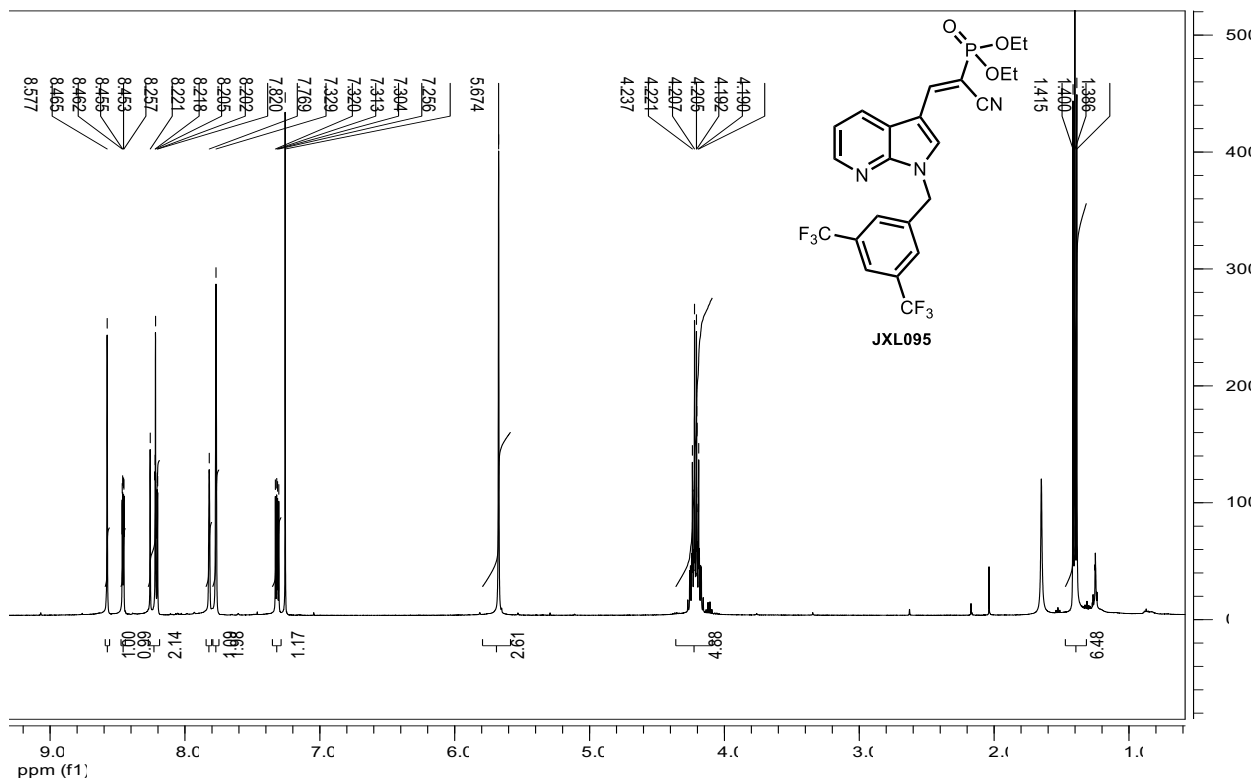

**<sup>1</sup>H NMR (500 MHz, CDCl<sub>3</sub>)**

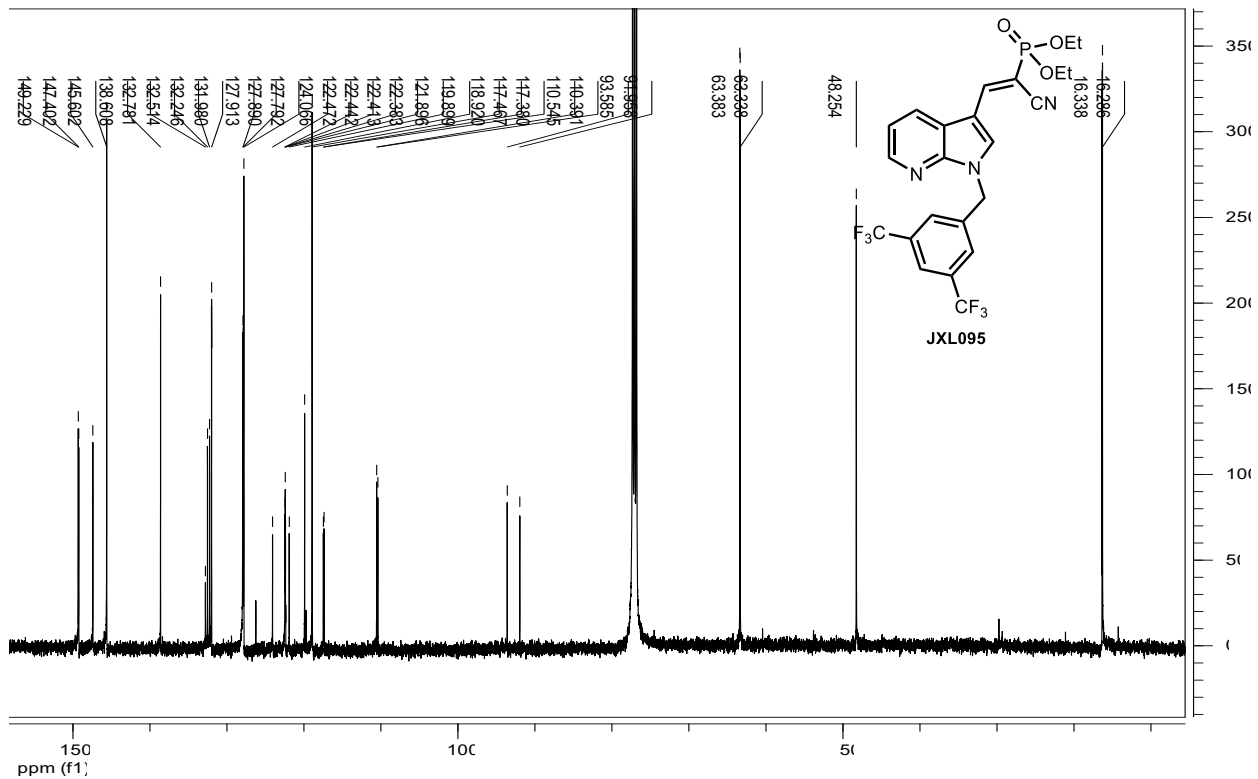

**<sup>13</sup>C NMR (126 MHz, CDCl<sub>3</sub>)**

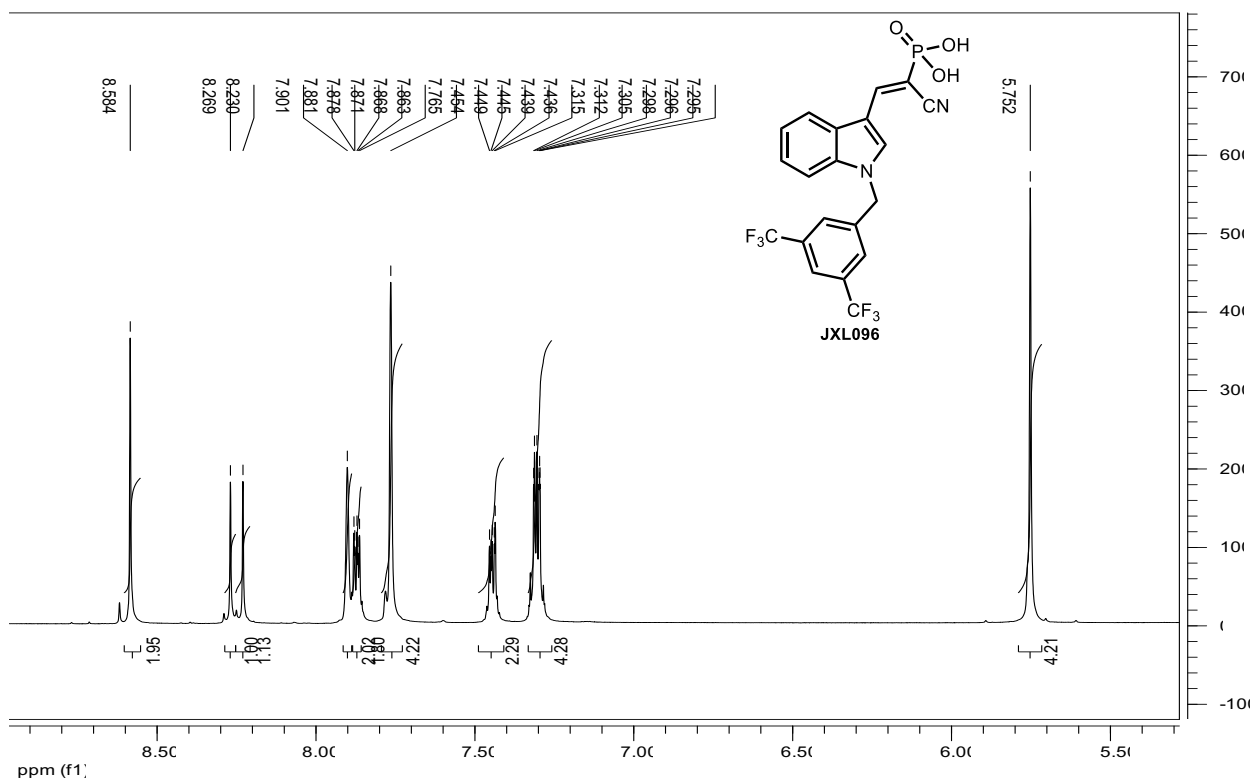

<sup>1</sup>H NMR (500 MHz, DMSO-d<sub>6</sub>)

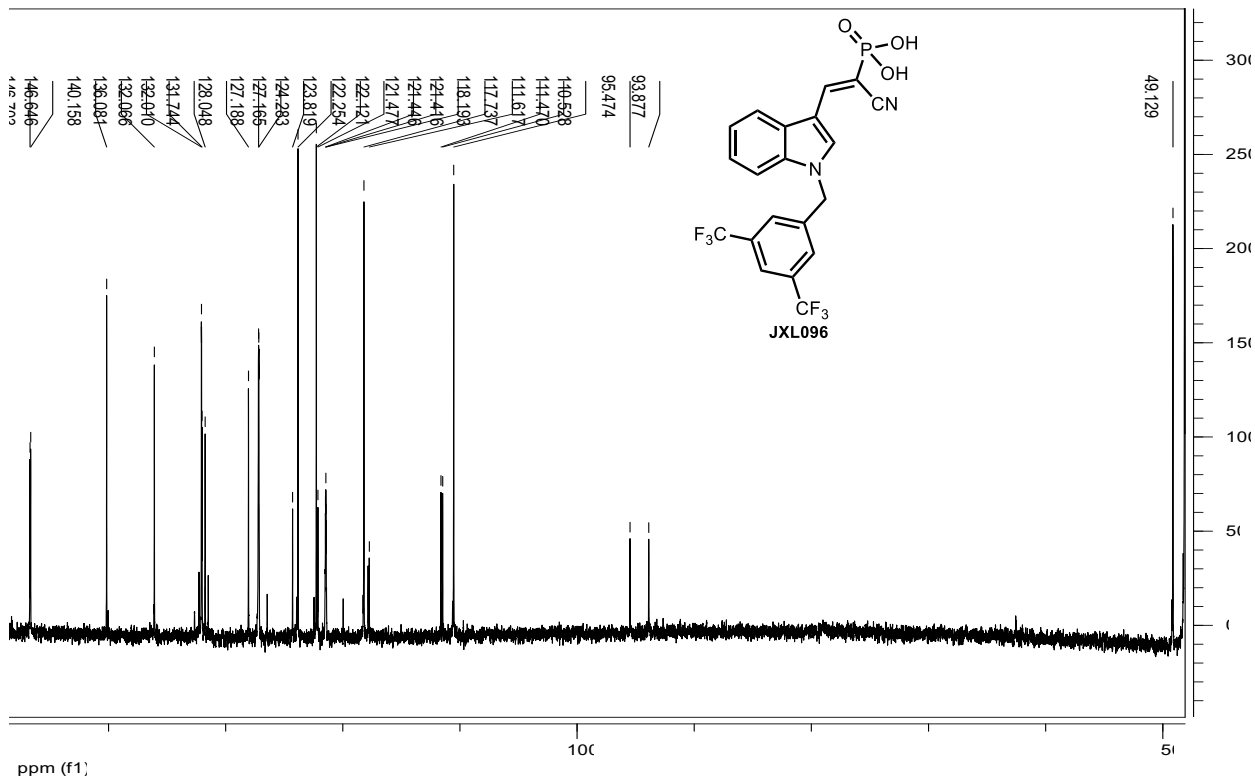

<sup>13</sup>C NMR (126 MHz, DMSO-d<sub>6</sub>)
